# Supplementary material for: Dynamics Geomagnetic Storm on 7–10 September 2015 as Observed by TWINS and Simulated by CIMI
Source: Copernicus journal article supplement (doi:10.5194/angeo-2018-64), 2018-06-25
Supplement: Supplementary file [file angeo-2018-64-AC8-supplement.pdf]

Anonymous Referee #1

Received and published: 11 July 2018

[GENERAL COMMENTS]

This paper presents the equatorial plasma pressure distributions obtained by the TWINS observation and by the drift kinetic simulation CIMI for the moderate storms of 7-10 September 2015. The general features of the plasma pressure in the inner magnetosphere are similar to each other, whereas some differences are found in terms of peak location, anisotropy, and spatial distribution. The authors attributed the differences to the shielding effect and spatially-localized, short-duration injections of hot plasma.

The direct comparison between a sophisticated observation and an advanced drift kinetic equation is highly valuable, and is promising to overcome the difficulties arising from in-situ satellite observations. The provided data is basically very interesting, and I admire the authors' efforts to derive the pressure and anisotropy.

**The authors thank the referee for the thoughtful and helpful comments. We respond positively below to each question and comment individually. Nevertheless, we cannot answer every question posed by referee with a full, unambiguous explanation. Such requires extensive investigations that are underway but are beyond the scope of this paper. We believe what many have said, i.e., good research raises at least as many questions as it answers.**

**Our responses are shown in bold font for ease of distinguishing our responses and the referee's comments.**

However, I have 3 major concerns as follows:

First, the physical interpretations made by the authors are unclear. Because of the lack of proper interpretations, I cannot catch new scientific knowledge or insights in the current version of the manuscript.

**We certainly hope that our specific responses allow the referee and other readers to "catch new scientific knowledge or insights. . ."**

Secondly, the reliability of the plasma pressure obtained by TWINS is also unclear. The spectral shape of the ion flux is almost the same at 4 different points, which seems unlikely to occur.

**The intent of showing the spectral shapes in Figure 10 was not to present an extended discussion of the spectra but rather to indicate that there were two peaks, one at low energy, i.e., below 20 keV, and a second near 40 keV and to illustrate why the paths of 40 keV particles are shown. We are not sure that this is unlikely to occur. Details of the magnitude and shape of the energy spectra will be addressed in an extensive study that is underway.**

**As to the overall reliability of the plasma pressure, that is a difficult question to answer definitively and quantitatively. In the description of the methodology used to obtain the ion pressure from the TWINS ENA images, we have referenced the extensive testing of the ion distributions obtained from**

**the TWINS ENA images. (See Section 2.2, lines 190 ff in the version of the paper where corrections are accepted and lines 194 ff in the version of the paper where corrections are marked.)**

Thirdly, the plasma pressure mentioned in this paper is "partial" so that the "true" distribution of the plasma pressure would be different. Careful description is needed when the authors intend to say the distribution of the pressure.

**The referee is correct. What we show in this paper are "partial" pressures. The intent is to have the TWINS and CIMI results consider as nearly as possible a similar energy range. In the revised paper, all references to the particular pressures from TWINS and CIMI are now designated as partial pressure.**

[SPECIFIC COMMENTS]

1. On the interpretations. The authors concluded that the difference between the observation and the simulation can be best explained by enhanced electric and magnetic shielding and/or spatially-localized, short-duration injections. First of all, please explain the meaning of the electric and magnetic shielding in more detail. Most of the readers may not understand the meaning of it. The electric shielding is supposed to result from the ionospheric electric field redistributed by the Region 2 field-aligned current.

**Excellent suggestion. We include in the revised version an explanation as to what we mean by electric shielding. [See Lines 436-445]**

What is the magnetic shielding?

**"magnetic shielding" was an improper term. Better to say enhanced electric field shielding and/or induction electric fields caused by spatially-localized, short duration injections. The term is omitted in the revised version.**

What is the expected effect of the shielding on the pressure distribution and pressure anisotropy?

**It has been demonstrated that the electric shielding can affect the ring current morphology. [See Lines 90-94 in the revised document.] The purpose of this paper is to show much more explicitly what are the expected effects. We are currently undertaking a project to couple the CIMI code in the inner magnetosphere with a 3D hybrid code that simulates the rest of the magnetosphere. We expect the results to address these issues in even greater detail.**

CIMI/RCM takes into account the shielding. What physical processes or parameters does CIMI/RCM need to consider properly to explain the observations?

**The CIMI simulations presented in this paper do not have localized injections into the inner magnetosphere. This has been demonstrated to have an effect on the pressure distributions. [See Lines 524-526 in the revised document.] While the CIMI simulations in this paper do include some contributions from induction electric fields, the Tsyganenko magnetic field is not updated on short enough time scale to capture all of the induction electric fields. We, of course, do not know whether the steps we are taking to provide localized and short term injection effects will answer all the questions.**

Have the authors tested CIMI/RCM with different conditions/parameters to explain the observations?

There have been investigations that demonstrate that changing the input at the boundary of the CIMI simulations does impact the ring current morphology. Also it has been shown that injecting non-isotropic pitch angle distributions impacts the parameter of the ring current. [See Lines 507-509 in the revised document] The authors have not tried, however, to reverse engineer the input to the CIMI simulations presented in this paper to attempt to match the data.

(1) On reliability of the plasma pressure. In Figure 10, the differential fluxes of the ions are shown as a function of energy at 4 points. The intensity of the flux is different but the spectral shape is almost the same with each other. Why is the spectral shape of the flux almost the same at the 4 points? According to in-situ observations, the spectral shape of the flux depends on L-value and magnetic local time (e.g., Milillo et al., 2001, 10.1029/2000JA900158), so that it seems quite unlikely to be the same spectral shape at 4 points. Please explain the validity of the spectral shape of the flux and the plasma pressure distribution presented in this paper.

We reference the published examples of validation of all the features of the ion distributions through comparisons with in-situ measurements. [See Lines 191-202.] These examples were chosen because the satellites happen to be in the right place at the right time to see the features of interest. It is true, of course, that such comparisons do not guarantee the complete validity of the current results.

The main reason for showing the measured energy spectra was to show why the paths of 46 keV ions were used to display the location and time of the injections of the ions that had 46 keV energy at the peaks. What the authors think has the relevant validity in this case is the high energy a low energy peaks in the spectra.

The outstanding work by Millilo et al , 2001 will make an important contribution to our current investigation into the details of the energy spectra during geomagnetic storms during the TWINS mission. The fact that the average results presented in their paper is for  $AE < 100$  nT does not directly invalidate the results presented here.

Finally, as was stated above, the focus of this paper is not the details of the energy spectra. If the referee would prefer, we could remove them from Figure 10.

Secondly, please explain the expected effect of spatially-localized, short-duration injections on the pressure and anisotropy.

As described above and is illustrated to some extent in previously referenced work, the authors expect that spatially-localized, short-duration injections will impact the spatial and temporal locations of the pressure peaks. We also expect it to be a key factor in explaining the observation of multiple peaks in the ring current.

Have the authors modeled spatially-localized, short-duration injections to explain the observations?

As stated above, it has been demonstrated that spatially localized injections can affect the ring current morphology, but we have not tried to match the observations for this particular storm without some experimental or theoretical guidance. There is an ongoing investigation to couple CIMI with a 3D hybrid simulation of the injections from the tail explicitly intended to address this question.

Thirdly, please explain the reason why the CIMI result always shows parallel anisotropy of the plasma pressure in the dawn-midnight-dusk region. The pressure anisotropy is largely different from the observations. Detailed explanation is needed.

**An explanation is given in the revised paper. [See Lines 490-496 in the revised document.] Whether this is the complete explanation is uncertain at this time. The authors expect to develop a more definitive explanation as part of an ongoing investigation to couple CIMI with a 3D hybrid simulation of the injections from the tail.**

- (2) On the plasma pressure. I suppose that the plasma pressure was calculated from integration of the differential flux over the energy range from 2.5 keV to 97.5 keV. The energy range is probably insufficient to cover all the ions trapped in the inner magnetosphere because the ions with energy greater than 100 keV is also known to contribute to the plasma pressure (energy density) largely (e.g., Smith and Hoffman, 1973, 10.1029/JA078i022p04731; Williams, 1983, 10.1016/0032-0633(81)90124-0). If the high energy ions remained during these storms, there would be another peak of the pressure, which may stay at L 2.5 – 3.0. I recommend discussing possible impacts of the high energy ions (>100 keV) on the conclusion. I also recommend emphasizing that the plasma pressure distribution is "partial" so that the pressure distribution is incomplete.

**The referee is correct, the plasma pressure presented in this paper should be referred to as partial pressure because it was calculated by integrating from 2.5 to 97.5 keV. The paper by Smith and Hoffman, 1973 certainly shows that higher energies can make significant contributions to the energy density (pressure). It is to be noted, however, that they say**

**“To contrast the development of the ring current for the two storms, we now consider those protons (1- to 138-keV protons were used) which contribute substantially to the storm-time ring current. While protons in this energy regime contribute only 20% or less to the total energy density out to L = 4 during magnetically quiet periods, their enhancement during magnetic storms, combined with a depletion of protons with energies greater than about 170 keV, make them the dominant (greater than 90%) contributors to the storm-time energy densities.”**

**The paper is referenced. [See Line 179 in revised document.]**

**The paper by Williams, 1983, describes the state of observations at that time with the conclusion, “It is found that the ring current energy density composition still has not been observed.”**

**The authors wholeheartedly agree with the recommendations of the referee.**

[MINOR COMMENTS]

Introduction: I recommend citing papers related to plasma pressure distribution and anisotropy observed by satellites, for example, De Michelis et al. (1999, 10.1029/1999JA900310), Ebihara et al. (2002, 10.1029/2002GL015430), and Lui (2003, 10.1029/2003GL017596).

**Definitely. The authors apologize for not recognizing these papers. [See Lines 65, 70, 72 in revised document.]**

Line 47-57: Simulation results with different electric field and/or magnetic field models have been conducted by Angelopoulos et al. (2002, 10.1029/2001JA900174) and Ebihara et al. (2004, 10.5194/angeo-22-1297-2004).

**Most definitely. The authors thank the referee for pointing us to these papers. [See Lines 55, 61 in revised document.]**

Line58-63: This paragraph seems not to provide information. What key spatial features do Wang et al. (2011) find?

**The authors think it is somewhat harsh to say that the paragraph [Lines 65- does not provide any information. In particular reference to the Wang et al. (2011) paper, the paper presents extensive data and comparisons with RCM modeling, but they are based upon statistical averages of events. The result from Wang et al (2011) that is relevant to this paper is what is stated in the last sentence of this paragraph. It is based upon the last sentence of the Abstract and the first sentence of the Summary.**

Line 311: The equatorial pressure  $p_{eq}$  is difficult to understand. Please explain how to derive  $p_{eq}$ .

**The authors are not sure why  $p_{eq}$  is difficult to understand. It is pressure at the equator as a function of position and pitch angle. It is the standard definition of pressure, i.e., the energy density of the ions, the integral of the distribution function times the velocity squared.**

**What follows is an exchange between the referee and the authors that clarified the original equations. The referee's comments are shown in different colors reflecting the order in which they entered the discussion. The authors responses are in bold black. The paragraph now reads as shown in Lines 333-340 of the revised document.**

The authors answered my comments properly except for one thing on the equatorial pressure (Line 311 in the first version of the manuscript). The authors stated that  $p_{eq}$  is pressure at the equator as a function of position and pitch angle, and that it is the standard definition of pressure. If it is the standard definition of pressure, please cite relevant reference. The reason why I am asking is that readers may be eager to know how the authors obtained the terms,  $P_{\perp}$  and  $P_{\parallel}$ . Here, I assume that  $P_{\perp}$  and  $P_{\parallel}$  are the pressure tensor components in the perpendicular and parallel components, respectively. Lui et al. (1987, 10.1029/JA092iA07p07459) show the equations to calculate  $P_{\perp}$  and  $P_{\parallel}$  as a function of velocity  $v$  and the velocity distribution function  $f$  (Eqs. 2 and 3 in Lui et al., 1987). The velocity distribution function  $f$  is associated with the differential flux that is directly measurable. What is the relationship between  $p_{eq}$  and the measured value (probably differential flux derived from the ENA observation)?

**The Referee is correct, the equation as presented is unclear. Somehow the full response to the original comment was lost.**

**The pressure anisotropy shown in Figure 3 is defined as**

$$A = \frac{P_{\perp} - P_{\parallel}}{P_{\perp} + P_{\parallel}}$$

**with**

$$P_{\perp} = \int_{-1}^{+1} p_{eq}(\alpha) \sin^2 \alpha d \cos \alpha \quad \& \quad P_{\parallel} = 2 \int_{-1}^{+1} p_{eq}(\alpha) \cos^2 \alpha d \cos \alpha$$

where  $\alpha$  is the pitch angle and  $p_{eq}$  is the equatorial pressure as a function of location and pitch angle which was obtained from the energy dependent number flux deconvolved from the TWINS ENA images, i.e.,

$$p_{eq} = \frac{2\pi}{m} \int_0^{\infty} E f(E, n, \cos \alpha) dE$$

where  $f(E, n, \cos \alpha)$  is the number of ions per unit area, energy, and steradian. This definition is derived from Braginskii (1965) and is consistent with previous formulations, e.g., Lui et al. (1987).

The authors now present the meaning of the equatorial pressure  $p_{eq}$  as  $p_{eq} = 2\pi m R E f_{de}$ , where  $m$  is mass,  $E$  is energy, and  $f$  is the number of ions per unit area, energy and steradian. First of all, I am unsure if  $f$  corresponds to the so-called differential number flux that is the number of ions per unit area, energy, time and steradian. If so, I have further comment. The definition of the perpendicular and parallel pressure ( $P_{\perp}$  and  $P_{||}$ ) is as follows.  $P_{\perp} = 1/2 R m v^2 \sin^2 \alpha F dv$  and  $P_{||} = R m v^2 \cos^2 \alpha F dv$ , where  $F$  is the velocity distribution function. These equations can be derived from the original definition of pressure (probably Braginskii (1965) provided, too). Lui et al. (1987) also present these equations. The velocity distribution function is given by  $F = m v^2 f$ . Substituting this into above equations, I have  $P_{\perp} = R R \pi v^2 m f v E \sin^2 \alpha d(\cos \alpha) dE = R R \pi v^2 m f v E dE \sin^2 \alpha d(\cos \alpha) = R p_{eq} \sin^2 \alpha d(\cos \alpha)$  and  $P_{||} = R R \pi v^2 m f v E \cos^2 \alpha d(\cos \alpha) dE = R^2 p_{eq} \cos^2 \alpha d(\cos \alpha)$ , where  $p_{eq} = R \pi v^2 m f v E dE$ . It seems that the definition of  $p_{eq}$  is different from the authors'. The same equation is found in Eqs (7) and (8) in De Michelis et al. (1997, doi:10.1029/96JA03743). Maybe I misunderstand, but I would like to make it clear. I suggest avoiding the term 'equatorial pressure' because this term is confusing and misleading. The above equations can be applied for everywhere, not restricted in the equatorial plane.

**The question seems to revolve around 2 areas of confusion.**

**First, the use of the subscript "eq" to indicate that it is the equatorial pressure. The purpose was to communicate that it is at the equator that we actually calculate the pressure anisotropy. We agree, however, that this may be confusing so we agree to leave it out.**

**Second the definition of the symbols  $f$  and  $F$  in the equations. We suggest that to try to avoid this confusion, we suggest the following:**

**The pressure anisotropy shown in Figure 3 is defined as**

$$A = \frac{P_{\perp} - P_{\parallel}}{P_{\perp} + P_{\parallel}}$$

with

$$\begin{Bmatrix} P_{\perp} \\ P_{\parallel} \end{Bmatrix} = \int_{-1}^{+1} d \cos \alpha \begin{Bmatrix} \sin^2 \alpha \\ 2 \cos^2 \alpha \end{Bmatrix} \left( \int_0^{\infty} dE \sqrt{\frac{2E}{m}} F(E, n, \cos \alpha) \right)$$

where  $\alpha$  is the ion pitch angle,  $E$  is the ion energy,  $n$  is the ion density,  $m$  is the ion mass and  $F(E, n, \cos \alpha)$  is the number flux per unit area, energy, time, steradian. This definition is derived from Braginskii (1965) and is consistent with previous formulations, e.g., Lui et al. (1987).

The authors revised the equation for the pressure terms. However, the equation seems to be different from the equation given by De Michelis et al. (1997, <http://doi.wiley.com/10.1029/96JA03743>) by a factor of  $\pi m$ . I am curious to know the reason why the equation is different. The definition of the plasma pressure is changed. Does this change have any impact on the result? I suppose that lower energy protons may have more impact on the pressure. I recommend removing  $n$  from  $F(E, n, \cos \alpha)$  because  $F$  is an arbitrary function and  $n$  is an independent variable.

C3

We very much appreciate the comments that have been made by the Referee. They have certainly made our paper better. But at this time, it seems that we having trouble communicating. We are not sure how to respond. Please see comments below: (The Referee's comments are repeated in italics.)

The authors revised the equation for the pressure terms. However, the equation seems to be different from the equation given by De Michelis et al. (1997, <http://doi.wiley.com/10.1029/96JA03743>) by a factor of  $\pi m$ . I am curious to know the reason why the equation is different.

I assume that the referee is referring to Eqs. (7) and Eqs (8) in De Michelis et al. (1997). Let's look at the unit of those eqs. For the pressure to have the correct units of energy per unit volume, the units of the "differential flux intensity",  $J$  in Eqs. (7) and (8) must be  $1/(\text{vol} * m * v)$ . The reason for the different factors is that  $J$  is not the flux we have in our equation. Our flux,  $F(E, n, \cos \alpha)$ , as it says in the text, has units of #ions/(energy\*time\*area\*steradian). One can check the units of the equation we have in the paper and they come out to be pressure. In fact if one substitutes the proper equation for a Maxwellian distribution into the equation in the paper, i.e.,

$$F(E, n, \cos \alpha) = \frac{n}{\sqrt{2m}(\pi T)^{3/2}} E e^{-E/T}$$

and performs the integrals, the result is  $nT$ , precisely what one expects for a Maxwellian.

The definition of the plasma pressure is changed.

The definition of the plasma pressure has not changed. We have been discussing a general definition of pressure. That has not changed, just the way it is presented has been made clearer with the help of the Referee.

Does this change have any impact on the result? I suppose that lower energy protons may have more impact on the pressure.

We assume this is in reference to the previous comment regarding the change in the definition of the pressure. We assume that the referee is referring to the fact that the pressure we calculate and present as results is the partial pressure, i.e., it is integrated from 2.5 to 97.5 keV for TWINS and 1 to 133 keV for CIMI. The referee correctly requested that we distinguish the pressure calculated in this paper as the partial pressure and we have done so. There is no change that would impact the results in this paper.

I recommend removing  $n$  from  $F(E, n, \cos\alpha)$  because  $F$  is an arbitrary function and  $n$  is an independent variable.

This comment may somehow be at the heart of the miscommunication that we are having at this time. Yes, it is in some sense arbitrary, i.e., in the expression for the pressure, it is whatever it is in a particular physical situation. In what we are presenting, however, the  $F(E, n, \cos\alpha)$  is definitely not an arbitrary function. For the TWINS results, it is what is obtained from the ENA images. For CIMI, it is what is obtained from the simulations. As stated above it has units of #ions/(energy\*time\*area\*steradian). We feel that it makes the most sense to express the pressure in terms of what it is obtained, i.e., from the measurements and simulations. It is then integrated as expressed in the formulas to obtain the pressures we present. We might also note that previous publications of TWINS and CIMI results have shown the average of  $F(E, n, \cos\alpha)$  over pitch angles as a function of energy.

My comment is simple: How did the authors calculate the plasma pressure? The following is the procedure that I am currently understanding. First of all, please make sure if my understanding is correct.

1. For the TWINS results, the authors obtained the differential flux  $F$  from ENA images. For CIMI, the authors calculated the differential flux  $F$ .  $F$  has units of the number of ions/(unit energy·unit time·unit area·unit solid angle).

Yes that is correct.

2. The authors calculated the pressure terms by integrating  $F$  with respect to energy and pitch angle.

$$P_{\perp} = \int Z d\cos\alpha \int n^2 \alpha Z dE r^2 E m$$

$$F, (1)$$

$$P_{\parallel} = 2Z d\cos\alpha \int n^2 \alpha Z dE r^2 E m$$



F. (2)

We can only apologize to the Referee. There was a typing error in the equations we sent in our previous reply. The factor in the integral should be  $\sqrt{2mE}$ . There also is a factor of  $2\pi$  from the integral over the gyrotropic angle. The paragraph in the proposal is now

The pressure anisotropy shown in Figure 3 is defined as

$$A = \frac{P_{\perp} - P_{\parallel}}{P_{\perp} + P_{\parallel}}$$

With

$$\begin{Bmatrix} P_{\perp} \\ P_{\parallel} \end{Bmatrix} = 2\pi \int_{-1}^{+1} d \cos \alpha \begin{Bmatrix} \sin^2 \alpha \\ 2 \cos^2 \alpha \end{Bmatrix} \left( \int_0^{\infty} dE \sqrt{2mE} F(E, n, \cos \alpha) \right)$$

where  $\alpha$  is the ion pitch angle,  $E$  is the ion energy,  $n$  is the ion density,  $m$  is the ion mass and  $F(E, n, \cos \alpha)$  is the number flux per unit area, energy, time, steradian. This definition is derived from Braginskii (1965) and is consistent with previous formulations, e.g., Lui et al. (1987).

The units are now  $\text{steradians} * E \sqrt{m^2 v^2} \frac{1}{El^2 t * \text{steradians}} = E \frac{mv}{mv^2 t} = \frac{E}{l^3}$ , i.e., energy/vol as it should be.

Now, I realized that the confusion comes from the definition of F.

That is exactly correct.

Eqs. (1) and (2) will be understandable if F is the velocity distribution function, NOT differential flux!

I am not sure what you mean by “differential flux”. It is my understanding that one can have energy flux, number flux, charge flux, etc either per velocity, per energy, etc.

It is true that  $f$  is often used for the velocity distribution function. That is not what  $F$  is the equation above and in the paper.

The velocity distribution function, which is the number of particles in 6-dimensional space, is defined by  $F = m^2 \int E_j$ .

Using this relationship, Eqs. (1) and (2) yield  $P_{\perp} = Z \int d\cos\alpha \sin^2 \alpha \int dE V^2 E m_j$ , (3)  $P_{\parallel} = 2Z \int d\cos\alpha \cos^2 \alpha \int dE V^2 E m_j$ . (4) Eqs. (3) and (4) are consistent with Eqs. (7) and (8) of De Michelis et al. (1997) who use the symbol  $J$  to represent the differential flux.

Yes, the corrected equations above are exactly as you say. If all that is needed to make it clear is to change  $F$  to  $j$ , we have no problem with that.

Hereinafter, I would like to define the terms  $F$  and  $j$  to be the velocity distribution function and the differential flux, respectively, to avoid confusion. I would appreciate if the authors make sure which equations, (1)-(2), or (3)-(4), the authors used to calculate the pressure.

We want the function in the integrals to be per unit energy. That is not what we would call a “velocity distribution”.

In the second reply, the authors stated that the plasma pressure was calculated by  $P_{\perp} = Z \int \text{peq} d\cos\alpha \sin^2 \alpha$ , (5)  $P_{\parallel} = 2Z \int \text{peq} d\cos\alpha \cos^2 \alpha$ , (6)  $\text{peq} = 2\pi m Z \int E_j dE$ . (7) Although Eqs. (5)-(7) are different from Eqs. (1)-(2) and Eqs. (3)-(4), the authors state that the change of the equations does not affect the results. Why? Does it mean that the authors did not use these equations to calculate the pressure? Does Eqs. (5)-(7) include typographical error?

Honestly, we do not remember an equation of mine with a  $j$  in it. We would not say that Eqs. (5-6) contain typographical errors. We would say they were ill-defined and unclear. We appreciate your efforts to make them clear. At this point, we think that they are at least well-defined and describe appropriately the equations we used to calculate the anisotropy measurements and simulations we report in the paper.

I may misunderstand something, but I would appreciate very much if the authors answer these questions.

Given the unclear definitions we presented originally and the mistakes made in the equation we sent in our earlier reply, it is reasonable that you have not understood. To the best of our knowledge, the equations are now correct and well-defined.

**To summarize, we want to use #ions per unit energy\*area\*time\*steradians in the integral definition of the parallel and perpendicular pressure.**

**We have tried and will gladly continue to try to answer your questions until you are satisfied.**

Line 489-496: Ebihara et al. (2009) also showed multiple peaks of the plasma pressure distribution in the inner magnetosphere by introducing temporal changes in the distribution function at the outer boundary of CRCM. It would be worth mentioning that the rapid changes in the distribution function in the plasma sheet could result in the multiple peaks of the plasma pressure.

**A sentence has been added pointing out that the model calculations did show multiple pressure peaks inside of 4 R<sub>E</sub>. [See Lines 534-535 in revised document.]**

Line 499 "But they do not provide incontrovertible evidence for the effects of spatially and temporally dependent injections into the inner magnetosphere." This sentence is difficult to understand.

**The sentence has been removed.**

Figure 10, caption: Please indicate the unit of the color bar (probably in keV), and pitch angle of the particle. What is the meaning of "Minimum – Maximum Energy for Each Path"?

**An explanation has been added. [See Figure 10 caption, Line 1035 of revised document.]**

Line 520, "Peak 5" Does it mean "Peak 4"?

**Yes. It has been corrected. [See Line 563 of revised document.]**

Line 497-527: The spectral shape of the differential flux of the ions is almost the same at the 4 points. Please explain the validity of the differential flux derived from TWINS? At Peak 3, the ion is inaccessible from the outer boundary. I recommend tracing the ion trajectory backward in time by starting at slightly different points.

**I think we have addressed this issue in response to previous comments. The main reason for presenting these spectra is to motivate showing the paths of the 46 keV ions. As stated above, if the referee prefers, they can be removed.**

Line 546-548: "This is not unexpected as the ions are being injected into regions of higher magnetic field, and conservation of the first adiabatic invariant would predict the enhancement of parallel pitch angles." I cannot understand this meaning. Please explain the reason why the conservation of the first adiabatic invariant results in the pressure anisotropy dominated by the parallel component?

**A full explanation has been added. [See Lines 589-598 in revised document.]**

Line 548-550: "Nevertheless the parallel anisotropy is seen in the observations only during the main phase of the first storm. This is also an indication of stronger electric and magnetic shielding." Please explain the reason why the stronger shielding results in the parallel anisotropy?

**The statement has been changed to be consistent with responses to previous comments by the referee. [See Lines 589-598 in revised document.]**

The authors answered my question properly. Everything is now clear. I have no additional comments or concerns. I recommend this paper for possible publication in *Annales Geophysicae*

C3

1 Dynamics of a Geomagnetic Storm on 7-10 September 2015 as Observed by TWINS and  
2 Simulated by CIMI

3  
4 Perez<sup>1</sup>, Joseph D., James Edmond<sup>1</sup>, Shannon Hill<sup>2</sup>, Hanyun Xu<sup>1</sup>, Natalia Buzulukova<sup>3</sup>, Mei-  
5 Ching Fok<sup>3</sup>, Jerry Goldstein<sup>4,5</sup>, David J. McComas<sup>6</sup> and Phil Valek<sup>4,5</sup>

6  
7 <sup>1</sup>Auburn University, Auburn, AL 36849, USA

8 <sup>2</sup>Emory University, Atlanta, GA 30322, USA

9 <sup>3</sup>NASA Goddard Space Flight Center, Greenbelt, MD 20771, USA

10 <sup>4</sup>Southwest Research Institute, San Antonio, TX 78228, USA

11 <sup>5</sup>University of Texas at San Antonio, San Antonio, TX 78249, USA

12 <sup>6</sup>Department of Astrophysical Sciences, Princeton University, NJ 08540, USA

13  
14 *Correspondence to:* J. D. Perez, perez@physics.auburn.edu

15  
16 **Abstract.** For the first time, direct comparisons of the equatorial ion partial pressure and pitch  
17 angle anisotropy observed by TWINS and simulated by CIMI are presented. The TWINS ENA  
18 images are from a 4-day period, 7-10 September 2015. The simulations use both the empirical  
19 Weimer 2K and the self-consistent RCM electric potentials. There are two moderate storms in  
20 succession during this period. In most cases, we find that the general features of the ring current  
21 in the inner magnetosphere obtained from the observations and the simulations are similar.  
22 Nevertheless, we do also see consistent contrasts between the simulations and observations. The  
23 simulated partial pressure peaks are often inside the observed peaks and more toward dusk than  
24 the measured values. There are also cases in which the measured equatorial ion partial pressure  
25 shows multiple peaks that are not seen in the simulations. This occurs during a period of intense  
26 AE index. The CIMI simulations consistently show regions of parallel anisotropy spanning the  
27 night side between approximately 6 and 8  $R_E$  whereas the parallel anisotropy is seen in the  
28 observations only during the main phase of the first storm. The evidence from the unique global  
29 view provided by the TWINS observations strongly suggests that there are features in the ring  
30 current partial pressure distributions that can be best explained by enhanced electric shielding

31 and/or spatially-localized, short-duration injections..

32

33 **Key Words.** Magnetospheric physics (Storms and substorms, Magnetosphere configurations and

34 dynamics) – Space plasma physics (charged particle motion and acceleration)

35 **1 Introduction**

36

37 The Earth's inner magnetosphere contains a large-scale current system, the ring current, in which  
38 the current is carried by trapped ions that are injected from the magnetotail and generally drift  
39 westward. It is a major contributor to magnetic depressions measured in the Earth's equatorial  
40 region that are expressed in terms of the Dst or SYM/H indices which characterize the time-  
41 evolution of geomagnetic storms. The plasma sheet is a primary source of particles in the inner  
42 magnetosphere. Therefore understanding and predicting the dynamics of the injected particles is  
43 a key factor in understanding the formation and decay of the ring current. This challenge can be  
44 addressed by a comparison of model and simulation results with observations.

45 There have been many studies which compared model results to observations. Kistler and  
46 Lawson (2000) used 2 different magnetic field models, dipole and Tsy89 (Tsyganenko, 1989),  
47 along with two different electric potential models, Volland (Volland, 1973)-Stern (Stern, 1975)  
48 and Weimer96 (Weimer, 1996), to calculate ion paths in the inner magnetosphere. They  
49 compared the results with in-situ proton energy spectra measured by the Active Magnetospheric  
50 Particle Tracer Explorers (AMPTE) (Gloeckler et al, 1985) over a range of local times. They  
51 found that, in the inner magnetosphere, the electric field has a much stronger effect on the  
52 particle paths than the magnetic field and that the Weimer96 model gave a better match to the  
53 features of the observed energy spectra than the Volland-Stern model. But the energy at which  
54 the drift paths became closed, 40-50 keV, was not in agreement with the observations. It is to be  
55 noted that the effects of induction electric fields were not included in this analysis. Angelopoulos

56 et al. (2002) added co-rotation electric fields to Volland-Stern, Weimer 96, Weimer 2000 along  
57 with modifications to improve fits to instantaneous electric field measurements by  
58 POLAR/HYDRA (Scudder et al., 1995) and Defense Meteorological Satellite Program satellites  
59 to compare with in-situ measurements of ion spectrograms from POLAR/HTDRA , EQUATOR-  
60 S (Kistler et al., 1999) and FAST (Carlson, et al., 2001). They found differences that seemed to  
61 require the inclusion of local inductive electric fields and/or particle injections. Ebihara et al.,  
62 (2004) modeled discrete energy bands observed by POLAR using a dipole magnetic field and a  
63 realistic electric field to show that changes in the convection electric field produced better  
64 results.

65 De Michelis et al (1999) obtained images of pressure in the equatorial plane, both orthogonal  
66 and parallel, and anisotropy using 2-year averages of proton distributions measured by  
67 AMPTE/CCE-CHEM (Dassoulas et al., 1985; Gloeckler et al., 1985). They located 2 current  
68 systems, the inner portion of the cross-tail current and the ring current during times of  $AE > 100$   
69 nT, and both the full and partial ring current along with region 2 currents for  $100 \text{ nT} < AE < 600$   
70 nT. Ebihara et al. (2002) compared statistically averaged data from POLAR/MICS (Wilken, et  
71 al., 1992) with simulations of proton drift paths using the Volland-Stern electric potential and  
72 found reasonable agreement. Lui, et al. (2003) used the AMPTE/CCE-CHEM and MEPA  
73 (McEntire et al., 1985) to construct the plasma pressure distribution over an extended energy  
74 range from 1 keV to 4 MeV. They found that the statistical pressure distribution obtained from  
75 the in-situ measurements differed from the results obtained from ENA images obtained from  
76 IMAGE/HENA (Brandt et al., 2004). Wang et al (2011) compared average spatial profiles of the



77 Time History of Events and Macroscale Interaction during Substorms (THEMIS) (Angelopoulos,  
78 2008) in situ-observations with simulations using the Rice Convection Model (RCM) self-  
79 consistent electric and magnetic fields (Toffoletto et al, 2003). The agreement with key spatial  
80 features of the particle fluxes confirms the importance of the magnetic and electric transport in  
81 determining features of the ring current. With the advent of missions dedicated to energetic  
82 neutral atom (ENA) imaging, e.g., (1) the 3 instruments, LENA (T. E. Moore et al, 2000),  
83 MENA (Pollock et al, 2000), and HENA (Mitchell et al, 2000) on board IMAGE (Burch, 2000),  
84 (2) the Energetic Neutral Atom Detector Unit (NUADU) (McKenna-Lawlor et al, 2005), and (3)  
85 Two Wide-angle Imaging Neutral-atom Spectrometers (TWINS) (McComas et al, 2009a;  
86 Goldstein and McComas, 2013; Goldstein and McComas, 2018), it became possible to test  
87 simulations against full images of the inner magnetosphere.

88 Fok et al (2003) compared simulations using the CRCM (Fok et al, 2001) model with ENA  
89 images from IMAGE/MENA & HENA. They were able to match the magnitude and trends of  
90 the observed Dst but not all of the short time variations. The empirical Weimer96 electric field  
91 model was not able to explain the fact that the peaks of the proton flux in the inner  
92 magnetosphere were in the midnight/dawn sector rather than the expected dusk/midnight sector  
93 during a strong storm on 12 August 2000, but the self-consistent CRCM electric field model did  
94 explain this feature. They also used the MHD fields computed by the BATS-R-US (Block-  
95 Adaptive-Tree Solar-wind Roe Upwind Scheme) (Groth et al, 2000) model to provide electric  
96 and magnetic fields and ion temperature and density at the model boundary ( $10 R_E$ ) at the

97 equator to model a large storm that occurred on 15 July 2000. The simulated ENA images  
98 matched the general features of the HENA ENA images.

99 Buzulukova et al. (2010) studied the effects of electric shielding on ring current morphology  
100 by comparing the results of CRCM simulations from a moderate and a strong storm with ENA  
101 images from TWINS and IMAGE/HENA. The Tsy96 empirical magnetic field, the Weimer-  
102 2000 electric potential model (Weimer, 2001) and the empirical Tsyganenko and Mukai (2003)  
103 model of the plasma sheet density and temperature were employed. They achieved agreement  
104 between the magnitude and trends of the observed SYM/H and the simulated values for both  
105 storms, and were able to explain the post-midnight enhancements of the pressure due to electric  
106 shielding. They did not include the effects of inductive electric fields or time dependence due to  
107 substorms.

108 Fok et al (2010) used ENA images from both TWINS1 and TWINS2 along with in-situ  
109 THEMIS observations during a storm on 22 July 2009 to validate the CRCM simulations. They  
110 found that, when a time-dependent magnetic field is included, the electric potential pattern is less  
111 twisted and the ion flux peak did not move as far eastward giving better agreement with the ENA  
112 observations.

113 It is clear that present-day simulations are able to explain the general features of the  
114 observations of the ring current in the inner magnetosphere, both from in-situ measurements and  
115 in ENA images. It is also clear that questions remain as to the contributions of various shielding  
116 mechanisms. Self-consistent dynamic electric potentials give better results. Inclusion of  
117 magnetic induction effects is also necessary for the best results. But to date effects on short time

118 scales, e.g., injections from sub-storms, bubbles, and bursty bulk flows have not been included in  
119 a self-consistent manner.

120 It is also important to note that the cases treated have been either statistical averages or single  
121 events in which there was no evidence for multiple peaks in the ring current pressure  
122 distribution. The existence of multiple peaks, however, has been observed in data from the  
123 AMPTE Charged Particle Explorer mission (Liu et al, 1987; Ebihara et al, 1985) and in ion  
124 distributions extracted from TWINS ENA images (Perez et al., 2015).

125 The science question to be addressed by this study is: Are there features in the global ring  
126 current pressure that are caused by enhanced electric shielding and/or spatially-localized, short-  
127 duration injections? We present for the first time a direct comparison between simulations of  
128 ring current equatorial partial pressure and anisotropy distributions with the unique global  
129 images extracted from the TWINS ENA images. We present cases in which the general  
130 characteristics of the observed partial pressure distribution are reproduced by the simulations and  
131 others in which the observed ion partial pressure peaks are at larger radius, in different MLT  
132 sectors, and display multiple peaks that are not found in the simulations. We also compare for the  
133 first time global images of the pressure anisotropy extracted from the TWINS ENA images with  
134 the results of simulations using the Comprehensive Inner Magnetosphere Ionosphere (CIMI)  
135 model (Fok et al., 2014).

136 In Sect. 2, we describe the measurement of the TWINS ENA images and the process by  
137 which ion partial pressures and anisotropy are extracted, and briefly discuss how this technique  
138 has been validated against in-situ measurements. In Sect. 3, we describe the important aspects of

139 the CIMI model, and how it has been compared with geomagnetic activity indices, in-situ  
140 measurements, and ENA images. The particular storms on 7-10 September 2015, which are the  
141 focus of this study, are described in Sect. 4. The comparison of results of the measurements and  
142 simulations are presented in Sect. 5. They are discussed in Sect. 6. Sect. 7 summarizes the  
143 results and the conclusions.

144

## 145 **2 Measurements**

146

### 147 **2.1 TWINS ENA Images**

148

149 The NASA TWINS mission of opportunity (McComas et al., 2009a; Goldstein and McComas,  
150 2013, Goldstein and McComas, 2018) obtains ENA images of the inner region of the Earth's  
151 magnetosphere. The instrument concept is described in McComas et al. (1998). Every 72 s with  
152 an integration (sweep) time of 60 s, full images are obtained. In this study, in order to obtain  
153 sufficient counts for the deconvolution process described in Sect. 2.2, the images are integrated  
154 over 15-16 sweeps. This means data is collected for ~15 min over an ~ 20 min time period. The  
155 energies of the neutral atoms span a range from 1-100 keV/amu. In the images used in this  
156 study, the energy bands are such that  $\Delta E/E = 1.0$  for H atoms. In order to enhance the processed  
157 image, a statistical smoothing technique and background suppression algorithms described in  
158 detail in Appendix A of McComas et al. (2012) are employed. This combined approach is an  
159 adapted version of the statistical smoothing technique used successfully for IBEX (McComas et

160 al., 2009b) data.

161

## 162 **2.2 Ion Pressures**

163

164 For the comparison with simulation results using the CIMI program (See Sect. 3.), the spatial and  
165 temporal evolution of equatorial ion partial pressure and pressure anisotropy are routinely  
166 obtained from the TWINS ENA images. To extract this information from the ENA images, the  
167 ion equatorial pitch angle distribution is expanded in terms of tri-cubic splines (deBoor, 1978).  
168 To fit the data and to obtain a smooth solution, the sum of normalized chi-squared and a penalty  
169 function derived by Wahba (1990) is minimized. The penalty function is what produces the  
170 smoothness of the result (in the sense of a minimum second derivative), and the normalized chi-  
171 square is what ensures that the calculated image corresponds to the measured ENA image. This  
172 means that the spatial structure obtained in the equatorial ion partial pressure distributions is no  
173 more than is required by the observations (Perez et al, 2004). In order to obtain pressures from  
174 the energy dependent ENA images, which are integrated over energy bands with widths equal to  
175 the central energy, e.g., 40 keV images are integrated from 20-60 keV, a technique using singular  
176 valued decomposition as described in Perez, et al., (2012, Appendix B) is employed. The energy  
177 range included in the partial pressures presented in this paper is 2.5-97.5 keV, i.e., the energy  
178 range observed by TWINS. It is to be noted that higher energies do make significant  
179 contributions to the total ring current pressure. (Smith and Hoffman, 1973)

180 In order to obtain the ion distributions from the ENA images, models for both the magnetic

181 field and the exospheric neutral hydrogen density are required. In this study, we use the  
182 Tsyganenko and Sitnov (2005) magnetic field model and the TWINS exospheric neutral  
183 hydrogen density model (Zoennchen, et al, 2015).

184 We must also deal with the fact that there are two components to the ENA emissions: the  
185 energetic ions created in charge exchange interactions with neutral hydrogen in the geocorona,  
186 the so-called high altitude emissions (HAE), and those due to charge exchange with neutral  
187 oxygen at low altitudes (below  $\sim 600$  km), the so-called low altitude emissions (LAE) (Roelof,  
188 1997). The former are treated as optically thin emissions, and the latter with a thick target  
189 approximation developed by Bazell et al. (2010) and validated by comparisons with DMSP data  
190 (Hardy et al., 1984).

191 A full range of the ion characteristics obtained from the TWINS ENA images have been  
192 compared with in-situ measurements. Measurements of the spatial and temporal variations of the  
193 flux in specific energy bands from the Time History of Events and Macroscale Interactions  
194 during Substorms (THEMIS) (Angelopoulos, 2008) have been compared with ion flux obtained  
195 from the TWINS ENA images (Grimes et al, 2013; Perez et al, 2015). A similar comparison  
196 (Perez et al, 2016) has been made with measurements made on the Van Allen Probes (formerly  
197 known as the Radiation Belt Storm Probes (RBSP) A and B) (Mauk et al., 2013; Spence et al.,  
198 2013) by the Radiation Belt Storm Probes Ion Composition Experiment (RBSPICE) (Mitchell et  
199 al., 2013) instrument. Pitch angle distributions and pitch angle anisotropy have been compared  
200 with THEMIS observations (Grimes et al, 2013). Energy spectra have also been compared with  
201 THEMIS measurements (Perez et al, 2012). Partial pressure and anisotropy from TWINS have

202 been compared with RBSP-SPICE-A (Perez et al, 2016) observations. While the in-situ  
203 measurements show more detailed temporal and spatial features, there is good agreement with  
204 the overall trends. Goldstein et al (2017) compared the TWINS ENA images with in-situ data  
205 from THEMIS and the Van Allen probes. They found evidence for bursty flows and ion  
206 structures in the plasma transport during the 2015 St. Patrick's day storm.

207

### 208 **3 The CIMI Model**

209

210 The CIMI model is a combination of the Comprehensive Ring Current Model (CRCM) (Fok et  
211 al, 2001b) and the Radiation Belt Environment (RBE) model (Fok, et al., 2008). The CRCM is a  
212 combination of the classic Rice Convection Model (RCM) (Harel et al, 1981) and the Fok kinetic  
213 model (Fok et al., 1993).

214 The CRCM simulates the evolution of an inner magnetosphere plasma distribution that  
215 conserves the first two adiabatic invariants. The Fok kinetic model solves the bounce-averaged  
216 Boltzmann equation with a specified electric and magnetic field to obtain the plasma distribution.  
217 It is able to include arbitrary pitch angles with a generalized RCM Birkeland current algorithm.  
218 The Fok model advances in time the ring current plasma distribution using either a self-  
219 consistent RCM field or the semi-empirical Weimer electric field model. A specified height-  
220 integrated ionospheric conductance is required for the RCM calculation of the electric field. The  
221 Hardy model (Hardy et al., 1987) provides auroral conductance. Losses along the particle drift  
222 paths are a key feature of the CIMI model. The CIMI pressure distributions utilized in this study

223 cover an energy range from 75 eV to 133 keV.

224 Simulated results from CIMI or its predecessors have been tested against a variety of  
225 measurements from a number of satellite missions. Some examples are: (1) AMPTE/CCE (Fok  
226 et al., 2001b), (2) IMAGE ENA images (Fok et al., 2003), (3) Polar/CEPPAD (Ebihara et al.,  
227 2008), (4) IMAGE/EUV (Buzulukova et al., 2008), (5) TWINS ENA images (Fok, et al., 2010),  
228 (6) Radiation belt measurements and Akebono (Glocer, et al., 2011), (7) TWINS plasma sheet  
229 boundary conditions (Elfritz, et al., 2014), and (8) TWINS ENA images and Akebono (Fok et al.,  
230 2014). Using the Dessler-Parker-Schopke relation (Dessler and Parker, 1959; Schokpe, 1966), it  
231 has also been shown that the simulated CIMI pressures match well the observed SYM/H. (See  
232 Figure 9, Buzulukova et al., 2010). In this study, we present the first direct comparison between  
233 CIMI and TWINS ion partial pressure and anisotropy.

234 Important input to the CIMI simulations are the particles injected into the inner  
235 magnetosphere along the outer boundary of the simulation. In the simulations shown here, it has  
236 been assumed that the particles have a Maxwellian distribution with density and temperature  
237 determined by a linear relationship to the solar wind density and velocity respectively (Ebihara  
238 and Ejiri, 2000; Borovsky et al., 1998). A 2 hour time delay between the arrival of the solar wind  
239 parameters at the nose of the magnetopause and its effect on the ions crossing into the inner  
240 magnetosphere also has been assumed (Borovsky et al. 1998). The pitch angle distribution of the  
241 incoming ions is taken to be isotropic.

242 Results from simulations with the CIMI model using two different forms of the electric  
243 potential are compared in this investigation. One is the Weimer 2K empirical model (Weimer,



244 2001) and the other is a self-consistent electric potential from RCM.

245

#### 246 **4 The 7-10 September 2015 Storms**

247

248 Figure 1 shows solar wind parameters and geomagnetic activity indices from the OMNI data  
249 service for 4 days, i.e., 7-10 September 2015. During this 4-day period, there were two SYM/H  
250 minima in succession. The first came early on 8 September 2015 after a 1-day long main phase  
251 on 7 September 2015. The minimum SYM/H was approximately -90 nT, so it was a relatively  
252 weak storm. There was a rapid recovery for approximately 3 hours coinciding with a sharp  
253 transition of  $B_z$  from negative, i.e., -8 or -9 nT, to positive, i.e., +18 or +19 nT along with a sharp  
254 transition of  $B_y$  from positive, i.e., +5 nT, to negative, i.e., -12 or -13 nT. There was also a sharp  
255 spike in the solar wind density at the inception of this first recovery phase. After the recovery  
256 was completed, there followed about a 12-hour period of near 0 nT SYM/H. The main phase of  
257 the second storm showed a relatively steady decline in SYM/H to a minimum near -110 nT in  
258 about 12 hours. The recovery from this second minimum was slow with a duration of about 1½  
259 days. The second main phase and minimum corresponded to a slow swing of  $B_z$  back to negative  
260 and  $B_y$  to a slightly negative value. Also to be noted is the strong AE index, indicative of  
261 possible substorm activity during the main phases and early recovery of both minima. There is  
262 also some AE activity near the end of the second storm. During those same periods, the ASY/H  
263 index also had significant values during the main phase and early recovery of both minima. (See  
264 Figure 1.)

265

## 266 **5 Results**

267

### 268 **5.1 Comparison of the Location of the Equatorial Ion Partial Pressure Peaks**

269

270 Figure 2 shows the location of the equatorial ion partial pressure peaks as measured from the  
271 TWINS ENA images (green diamonds) and simulated by CIMI with both the Weimer 2K (red  
272 lines) and the RCM (orange lines) electric fields. Figure 2a is the radial location for the four  
273 days of the 07-10Sep2015 storms, and Figure 2b is the MLT location.

274 The radial positions of the partial pressure peaks for the CIMI simulations are similar,  
275 i.e., about  $4 R_E$ , for both the Weimer 2K and the RCM electric potentials. The RCM results do  
276 show more variation. Many of the radial positions for the TWINS observations are also near  $4$   
277  $R_E$ , but others are at larger values. The MLT locations of the peaks are generally in the  
278 dusk/midnight sector. This is consistent with statistical analysis of proton fluxes from the  
279 database of the magnetospheric plasma analyzer (MPA) instrument aboard Los Alamos satellites  
280 at geosynchronous orbit (Korth et al., 1999). But the CIMI simulations, with both the Weimer  
281 2K and RCM potentials, show a brief time early on 8 September 2015 where some of the peaks  
282 are in the midnight/dawn sector. Given the assumed 2 hour delay in the propagation of the solar  
283 wind parameters into the inner magnetosphere, this seems to correlate with a sharp swing in  $B_y$   
284 shown in Figure 1. The TWINS observations show several instances of the partial pressure  
285 peaks being near midnight and in the midnight/dawn sector. As described earlier, ion flux peaks

286 in this region have been seen from ENA images for very strong storms (Fok et al, 2003).

287

## 288 **5.2 Comparison of Equatorial Ion Partial Pressure Peaks and Anisotropies at Specific** 289 **Times**

290

291 The following subsections will examine in detail a number of specific times during these two  
292 storms in order to address similarities and differences in the simulations with an empirical and a  
293 self-consistent electric field model and with observations. One apparent difference in what  
294 follows is the magnitude of the equatorial partial pressure for the three cases. The maximum on  
295 the colorbars for Figures 3-9 were chosen to be different for each time in order to emphasize the  
296 spatial dependence of the pressure distribution. The maxima for the two CIMI simulations are  
297 very similar, i.e., the RCM vary from 20-38 nPa and the Weimer 2K from 15-30 nPa. But the  
298 maxima of the TWINS peaks vary from 1-4 nPa, which is significantly smaller.

299 The magnitude of the ion intensities derived from the ENA images has been addressed in  
300 several previous comparisons with in-situ measurements. Vallat et al. (2004) compared Cluster-  
301 CIS (Réme et al., 2001) and IMAGE-HENA observations and found that for relatively strong  
302 fluxes, the agreement was excellent for two cases, but for another the ion flux determined from  
303 the ENA images was somewhat higher than the in-situ observations and in another it was  
304 significantly lower. Grimes et al. (2013) compared THEMIS (Angleopoulos, 2008) spectral  
305 measurements with spectra obtained from TWINS ENA images and found that the in-situ fluxes  
306 were a factor of 3 times greater than those obtained from the ENA images. Perez et al. (2016)

307 compared 30 keV ion fluxes obtained from TWINS ENA images with in-situ measurements by  
308 RBSPICE-A (Mauk et al., 2013) and found good agreement in both the average time dependent  
309 trend and in the magnitude. The in-situ measurements, of course, showed more structure given  
310 their much higher spatial and temporal resolution. Goldstein et al. (2017) analyzed data from  
311 THEMIS, Van Allen probes, and TWINS for a large storm to find that the ion fluxes obtained  
312 from the ENA images were generally lower than those from the in-situ measurements. They also  
313 found significant variations in the in-situ data. So while some part of the difference in the partial  
314 pressures obtained from TWINS measurements and CIMI simulations are due to the larger  
315 energy range included in the CIMI pressures, it is not the entire explanation. The issue of the  
316 absolute magnitude remains an important, unresolved issue, but the fluxes obtained from ENA  
317 images have been shown to reflect the global structure of the trapped ring current particles, and  
318 that is the emphasis in this study.

319

### 320 **5.2.1 2200 UT 07 September 2015**

321

322 Figure 3 shows the equatorial partial pressure profiles and the pressure anisotropy from the  
323 CIMI/RCM simulation, the TWINS observations, and the CIMI/Weimer 2K simulation at 2200  
324 UT 07 September 2015. This was late in the main phase of the first storm (See Figure 1.). The  
325 radial locations of the peaks differ by less than 1  $R_E$ . The MLT locations of the partial pressure  
326 peaks, however, differ by 3 hours in MLT. While the TWINS peak is near midnight, the CIMI  
327 peaks are well into the dusk/midnight sector with the CIMI/Weimer even closer to dusk. Results

328 for the Weimer96 when compared with the RCM for a very strong storm showed even greater  
 329 shielding for the RCM when compared to the empirical Weimer model (Fok et al., 2003). Note,  
 330 however, that for this weaker storm, the MLT spread in the peaks of the partial pressure  
 331 distributions do overlap. It is also to be noted that the TWINS results show more radial  
 332 structure.

333 The pressure anisotropy shown in Figure 3 is defined as

$$334 \quad A = \frac{P_{\perp} - P_{\parallel}}{P_{\perp} + P_{\parallel}}$$

335 with

$$336 \quad \begin{Bmatrix} P_{\perp} \\ P_{\parallel} \end{Bmatrix} = 2\pi \int_{-1}^{+1} d \cos \alpha \begin{Bmatrix} \sin^2 \alpha \\ 2 \cos^2 \alpha \end{Bmatrix} \left( \int_0^{\infty} dE \sqrt{2mE} F(E, n, \cos \alpha) \right)$$

337  
 338 where  $\alpha$  is the ion pitch angle,  $E$  is the ion energy,  $n$  is the ion density,  $m$  is the ion mass and  
 339  $F(E, n, \cos \alpha)$  is the number flux per unit area, energy, time, steradian. This definition is derived  
 340 from Braginskii (1965) and is consistent with previous formulations, e.g., Lui et al. (1987).

341 The pressure anisotropy at the pressure peaks is somewhat perpendicular in all 3 cases. We  
 342 also note a region of parallel anisotropy at  $R > 6-7 R_E$  from pre-midnight to dawn in all 3.

343

### 344 **5.2.2 0400 UT 08 September 2015**

345

346 Figure 4 shows results for 0400 UT 08 September 2015 in the same format. This was early in  
 347 the rapid recovery phase of the first minimum in SYM/H. (See Figure 1.) The radial location of

348 the partial pressure peaks again differ by less than  $1 R_E$ . This time, however, all the peaks are in  
349 the dusk/midnight sector. Again the CIMI/Weimer 2K is closer to dusk than the CIMI/RCM  
350 pressure profiles. The TWINS peak is between the two simulations. The CIMI/Weimer 2K  
351 pressure distribution is more symmetric than the others even though the ASY/H shown in Figure  
352 1 is  $> 50$  nT. The region of parallel pressure anisotropy in the CIMI results does not appear in the  
353 TWINS results which are more nearly isotropic in general compared to the CIMI simulations.

354

### 355 **5.2.3 1600 UT 08 September 2015**

356

357 Figure 5 shows results for 1600 UT 08 September 2015 in the same format. This was during the  
358 period of near 0 nT SYM/H between the two storm minima. It was during a time period when  
359 both  $B_z$  and  $B_y$  are positive (See Figure 1.). Again the radial location of the partial pressure  
360 peaks are similar. The TWINS peak, however, has moved to the noon/dusk sector. It has  
361 continued to move westward from its positions in Figures 3 and 4. This could be the classic drift  
362 due to magnetic field gradient and curvature as originally observed in IMAGE/HENA ENA  
363 images by Brandt et al., (2001). In contrast to the TWINS pressure profile, the CIMI pressures  
364 reflect a nearly symmetric ring current. While ASY/H was relatively low at this time, it did  
365 show a small peak (See Figure 1.). Both the CIMI/RCM and the CIMI/Weimer 2K results show a  
366 region of parallel pressure anisotropy at large radii that almost circles the Earth. The TWINS  
367 results show only perpendicular pressure anisotropy.

368

369 **5.2.4 0200 UT 09 September 2015**

370

371 Figure 6 shows results for 0200 UT 09 September 2015 in the same format. This is early in the  
372 main phase of the second minimum in SYM/H (See Figure 1.). The TWINS equatorial ion  
373 partial pressure peak is at a larger radius and in the midnight/dawn sector in contrast to the CIMI  
374 results where the peaks are in the dusk/midnight sector. There is considerably more spatial  
375 structure in the TWINS results. The strongest TWINS peak extends well into the dusk/midnight  
376 sector with a region near the same location as the CIMI peaks and with another at a larger radius  
377 in the dusk/midnight sector. There is an even larger difference in the pressure anisotropy. The  
378 parallel region at large radii in the CIMI result is even more parallel but is again absent in the  
379 TWINS result. The small intense parallel region at very small radius in the TWINS plot is a  
380 region of very low flux and therefore not a reliable ratio. At this time, the AE index was rising  
381 sharply as was the ASY/H index (See Figure 1.).

382

383 **5.2.5 0400 UT 09 September 2015**

384

385 Figure 7 shows results for 0400 UT 09 September 2015 in the same format. This was just 2  
386 hours later than the time shown in Figure 6. It was near the end of the main phase of the second  
387 minimum in SYM/H (See Figure 1.). Again the TWINS peak is in the midnight/dawn region  
388 whereas the CIMI peaks appear in the dusk/midnight region, but the radial location is very nearly  
389 the same. This time, however, the TWINS peak extends past dawn and not into the pre-midnight

390 region. Even though the MLT location of the CIMI/RCM and the CIMI/Weimer 2K peaks are  
391 nearly the same, the CIMI/Weimer 2K maximum extends to almost noon. The pressure  
392 anisotropy shows features very similar to those seen 2 hours previously (See Figure 6.) .The AE  
393 index has been at fairly high values for about an hour and the ASY/H index is beginning to rise  
394 sharply again (See Figure 1.).

395

### 396 **5.2.6 1800 UT 09 September 2015**

397

398 Figure 8 shows results from 1800 UT 09 September 2015 in the same format. At this time  
399 SYM/H (See Figure 1.) shows that the second storm was a few hours into a slow recovery.

400 There are 4 distinct peaks in the TWINS equatorial ion partial pressure distribution. The highest  
401 is at large radius, about 7  $R_E$ , in the dusk/midnight sector. There is another lower peak, also at  
402 large radius in the noon/dusk sector. There are two peaks at a similar radius as the CIMI peaks.  
403 This interval is an example of multiple peaks in the ring current that have been inferred from in-  
404 situ measurements (Liu et al., 1987), and seen in analysis of ENA images (Perez et al., 2015).

405 The parallel pressure anisotropy in the CIMI results is again present, but it is smaller and weaker  
406 than at previous times. Again TWINS does not show this feature.

407

### 408 **5.2.7 1700 UT 10 September 2015**

409

410 Figure 9 shows results from 1700 UT 10 September 2015 in the same format. At this time the



411 second storm was well into its slow recovery, SYM/H was beginning a small dip, there was a  
412 peak in the AE index, and ASY/H had a weak peak. (See Figure 1.) The partial pressure profiles  
413 for CIMI/RCM and CIMI/Weimer 2K are symmetrical with a peak in the dusk/midnight sector.  
414 The TWINS partial pressure peak is closer to dusk. This interval is in contrast to results at  
415 earlier times in the storm. The TWINS partial pressure peak is at a larger radius, and there is  
416 very little flux in the dawn/noon sector. The CIMI pressure anisotropies again show a region of  
417 strong parallel pitch angles that is not seen in TWINS.

418

## 419 **6 Discussion**

420

421 Injections from the plasma sheet are thought to be the primary source of ring current protons in  
422 the inner magnetosphere, i.e., those that are observed by TWINS. Electric and magnetic fields  
423 determine the ultimate path of the injected ions, i.e., whether they reach locations close enough  
424 to the Earth where the magnetic gradient and curvature drifts are strong enough to exceed the  
425 electric drift forming the ring current or whether they drift out to the magnetopause. The  
426 locations of the partial pressure peaks from the CIMI/RCM and the CIMI/Weimer 2K  
427 simulations and the TWINS observations during the 4-day period, 07-10 September 2015, show  
428 that the peaks are usually in the dusk/midnight sector. (See Figure 2b) This phenomenon is  
429 consistent with analysis of data at geosynchronous orbit (Birn et al., 1997). Nevertheless the  
430 TWINS observations show partial pressure peaks that are often at larger radii than the CIMI  
431 simulations, even when they are in the dusk/midnight sector (See Figure 2a.). The fact that the

432 CIMI/Weimer peaks are generally closer to dusk than the CIMI/RCM. (See Figure 2b.) is  
433 consistent with simulations reported by Fok, et al. (2003). The TWINS MLT locations are closer  
434 to midnight and in the midnight /dawn sector more frequently than the CIMI results. This  
435 suggests that there are often enhanced electric shielding and effects from localized and short time  
436 injections that are not present in the CIMI simulations. To understand how the electric  
437 shielding works to affect the paths of the injected particles, we note that the convection electric  
438 field from the solar wind is mapped into the magnetosphere along open field lines into the polar  
439 ionosphere. It is then shielded from penetrating to lower latitudes and therefore further into the  
440 inner magnetosphere by the Birkeland region 2 currents driven by pressure gradients in the ring  
441 current. During geomagnetic storms when there is a sharp turn in the z-component of the  
442 interplanetary magnetic field (IMF) from negative to positive (See row 2 of Figure 1.), the  
443 accompanying electric field in the ionosphere associated with the Region 2 currents can produce  
444 what is referred to as over-shielding. See for example Jaggi and Wolf (1973). There are also  
445 neutral disturbance dynamo electric fields in the ionosphere that affect electric shielding.  
446 Localized and short time injections may contribute to the complexity of these effects.

447 Looking in detail reveals an even more complex story. Figures 3-9 show comparisons of the  
448 partial pressure profiles during different phases of the storms. In the main phase of the first  
449 storm (See Figure 3.), while there is a significant AE index and ASY/H asymmetry (See Figure  
450 1.), the observed TWINS peak is at midnight while the simulated peaks are more toward dusk.  
451 During the rapid recovery phase of the first storm, (See Figure 4.) when the AE index is smaller  
452 (See Figure 1.), the observed and simulated partial pressure peaks are at approximately the same

453 radius, and all are in the dusk/midnight sector. During the period between the two storms (See  
454 Figure 5.) when there is very little geomagnetic activity, i.e., SYM/H near 0 nT (See Figure 1.),  
455 the observed partial pressure peak has drifted more westward than the simulated peaks, even  
456 going past dusk (See Figure 5.). Another feature to note is the symmetry of the ring current in the  
457 CIMI simulations whereas the TWINS observations show a gap in the dawn/noon sector. The  
458 ASY/H index shows a small peak at this time (See Figure 1.) This suggests time dependence in  
459 the electric and magnetic fields that is not present in the CIMI simulations.

460 It is in the second storm (Figures 6-8) that the TWINS observations begin to show more  
461 spatial and temporal structure than the CIMI simulations. In Figure 6, early in the main phase,  
462 the TWINS observations show the main partial pressure peak near 6  $R_E$  and 3 MLT while the  
463 simulated peaks are near 4  $R_E$  and 20 MLT. But there is also a strong observed pressure region in  
464 the same area as the simulated peaks. Just 2 hours later, the simulated pressure shows little  
465 change, but the observed main peak extends farther eastward, and the relative pressure in the  
466 dusk/midnight region has weakened relative to the main peak. Fourteen hours later in the  
467 recovery phase of the second storm, the simulated peaks have not changed significantly, whereas  
468 the TWINS observed peaks are dramatically different (See Figure 8.). There are 4 pressure  
469 peaks. The strongest peak is at 7  $R_E$  and just westward of midnight. At smaller radii, there is a  
470 weaker peak near the location of the simulated peaks as well as one on the dawn side past  
471 midnight. There is another weaker peak at large radius near noon. It should be noted that there  
472 is strong AE activity and that ASY/H has significant values during this period (See Figure 1.).  
473 This activity suggests that there may be variations in the electric and magnetic fields produced

474 by spatial and time dependence of the location of the ion injections that are not present in the  
475 CIMI simulations.

476 The increased structure in the partial pressure distributions as observed by TWINS is  
477 especially dramatic during the recovery phase of the second storm. (See Figure 8.) There is  
478 strong AE activity and the largest values of ASY/H during this period. In the late recovery of the  
479 second storm (See Figure 9.), the CIMI simulations show a symmetric ring current as expected  
480 (Pollock et al., 2001). The TWINS results are not symmetric and have a peak at large radius in  
481 the dusk/midnight sector. There is some AE activity and a rise in the ASY/H index at this time.

482 Figures 3-9 also show comparisons of the pressure anisotropy during the different phases of  
483 the storm. The pressure anisotropies at the partial pressure peaks are generally in good  
484 agreement among the 3 results presented here, i.e., the pitch angle distributions are more  
485 perpendicular than parallel. The CIMI simulations, however, show a consistent region of parallel  
486 anisotropy at radii outside the pressure peak. The degree to which the pitch angle distributions  
487 are more parallel increases until the early recovery phase of the second storm (See Figure 8.)  
488 where it weakens but then strengthens again in the late recovery phase. This feature is seen by  
489 TWINS only in the main phase of the first storm (See Figure 3.) and perhaps very faintly in the  
490 early recovery phase of the second storm. (See Figure 8.) The ions that are injected at the  
491 boundary of the CIMI simulations, located at  $10 R_E$  for those shown here, have an isotropic pitch  
492 angle distribution. As they are accelerated while conserving the first adiabatic invariant to enter  
493 the region observed by TWINS, i.e. an outer radius of  $8 R_E$ , their pitch angle distributions  
494 become parallel because the energy increase exceeds what can be absorbed in the perpendicular

495 pitch angles while still conserving the first adiabatic invariant. One mechanism for reducing the  
496 parallel anisotropy is wave-particle interactions which are not included in the CIMI simulations..

497 Another possible contributing factor to the differences between the observations and  
498 simulations is the input to the CIMI model used in these simulations. Following Fok et  
499 al.(2014), the ion distribution at the boundary of the CIMI simulations in this study is an  
500 isotropic, Maxwellian distribution at a radius of  $10 R_E$  at all MLT. The density and temperature  
501 of the Maxwellian is taken to have a linear relation to the solar wind density and solar wind  
502 velocity respectively (Borovsky et al., 1998; Ebihara and Ejiri, 2000). This produces a relatively  
503 smooth time variation in the input which has been shown to be successful in matching the  
504 general features of SYM/H (Buzulukova et al., 2010), but does not match the more rapid  
505 variations as a function of time. It has also been shown that varying the spatial dependence of  
506 the input along the boundary can have a significant effect on the location of the pressure peaks  
507 (Zheng et al., 2010). Likewise Buzulukova et al. (2010) showed that input of non-isotropic  
508 pitch angle distributions can affect the comparison between the CIMI simulations and the ENA  
509 observations.

510 There is significant experimental evidence for temporal and spatial variations in the injection  
511 of ions into the trapped particle region of the ring current (e.g., Birn et al., 1997; Daglis et al.,  
512 2000; Lui et al., 2004). Bursty bulk flows associated with near-Earth magnetic reconnection  
513 events have been frequently observed in the magnetotail (Angelopoulos et al., 1992). These fast  
514 flows have been observed to have a  $1-3 R_E$  width in the dawn-dusk direction (e.g., Angelopoulos  
515 et al., 1996; Nakamura et al., 2001; Angelopoulos et al., 2002). Magnetic flux ropes flowing

516 Earthward have also been observed (e.g., Slavin et al., 2003; Eastwood et al., 2005; Imber et al.,  
517 2011). Short time, spatially limited injections into the inner magnetosphere have also been seen  
518 in 3D hybrid simulations. (e.g. see Lin et al., 2014.) Thus it is reasonable to suppose that the  
519 additional spatial and temporal structure in the partial pressure profiles observed during this  
520 storm is due to effects not yet incorporated into the simulations.

521 Buzulukova et al. (2008) combined the Comprehensive Ring Current Model (CRCM) (Fok et  
522 al., 2001) and the Dynamical Global Core Plasma Model (Ober et al., 1997) to model features of  
523 the plasma sphere observed by the Extreme UltraViolet (EUV) instrument on the Imager for  
524 Magnetosphere-to-Aurora Global Exploration (IMAGE) (Burch, 2000) on 17 April 2002. They  
525 found that injections from the plasma sheet that were localized in magnetic local time (MLT)  
526 explained observed undulations of the plasmasphere. Some features of an inductive electric field  
527 were included through the use of a time dependent magnetic Tsy96 (Tsyganenko and Stern,  
528 1996) magnetic field model.

529 Likewise, Ebihara et al. (2009) compared CRCM simulations with midlatitude Super Dual  
530 Auroral Radar Network (SuperDARN) Hokkaido radar observations of fluctuating ionospheric  
531 flows on 15 December 2006. Using input from geosynchronous satellites to model the temporal  
532 and spatial variations of the plasma sheet input to the inner magnetosphere, they were able to  
533 show that the resulting pressure variations in the ring current were responsible for field aligned  
534 currents and matched the dynamics of the observed subauroral flows. The results from the  
535 CRCM also showed multiple pressure peaks inside of 4  $R_E$ . This is indicative of a strong

536 connection between the dynamics of the ring current pressure distribution and the rapid temporal  
537 characteristics of the subauroral plasma flow during a geomagnetic storm.

538 The comparisons between the observations and the simulations presented here give a view  
539 not available from in-situ measurements. To further elucidate this phenomenon, we present in  
540 Figure 10 the paths of particles injected into the inner magnetosphere calculated using the CIMI  
541 simulations that provide additional support for concluding that the observations may show  
542 effects from enhanced electric shielding and localized and short time injections. The focus is  
543 upon the time 1800 UT on 9 September 2015 during the second storm. As shown in Figure 8,  
544 the TWINS observations show multiple peaks in contrast to the single peak in the CIMI  
545 simulations. For each of the 4 partial pressure peaks observed by TWINS, we show the energy  
546 spectrum (left column) and the paths of particles that reach the location of the pressure peaks  
547 (right column). The energy spectra show two energy maxima, one below 20 keV and the largest  
548 maxima above 40 keV. The ion paths are calculated with the CIMI model using the RCM  
549 fields. The path shown is of a particle with an energy of 46 keV when it reaches the respective  
550 pressure peaks, i.e., the energy at the maximum of the energy spectra shown in the left hand  
551 column. The TWINS partial pressure configuration from Figure 8 is repeated in gray scale so as  
552 to highlight the paths. In each case the pressure peak is shown by a black square. Along the path  
553 there are stars every 10 minutes. The color of the stars indicate the ion energy as it moves along  
554 its path. (See color bar.)

555 For Peak 1, the 46 keV particle enters at 10  $R_E$  in the midnight/dawn sector. The time from  
556 injection to reaching this peak in the outer magnetosphere is approximately 20 minutes. For

557 Peak 2, which is at a smaller radius, a 46 keV ions arrives at the peak from the dawn/midnight  
558 sector after approximately 2 ½ hours. This peak observed by TWINS is very near the pressure  
559 peak that appears in the CIMI simulations. (See Figure 8.) Peak 3 is at a similar radius as Peak  
560 2, but it is on the dawn side of midnight. The path of a 46 keV particle followed backwards in  
561 time from this peak location does not show an injection location after completing nearly 3 orbits  
562 of the Earth in approximately 12 hours. This partial pressure peak observed by TWINS may not  
563 be consistent with the RCM fields in the CIMI model. Peak 4 is in the noon/dusk sector. A 46  
564 keV particle reaches this peak after approximately 3 ¾ hours and 1 orbit of the Earth. It enters  
565 the inner magnetosphere in the same sector, i.e., the midnight/dawn sector, as the particle that  
566 reached the location of Peak 1, but it was injected much earlier. The different locations and  
567 times of the entrance of the ions at the peaks of the energy spectra of the 4 pressure peaks 1, 2,  
568 and 4 observed by TWINS at 1808 UT on 9 September 2015 suggest spatial and temporal  
569 variations in the injections from the plasma sheet. The fact that the calculated path for Peak 3  
570 does not show an injection may indicate variations in the fields not captured in the models.

571

## 572 **7 Summary and Conclusions**

573

574 We have presented, for the first time, direct comparisons of the equatorial ion partial pressure  
575 distributions and pitch angle anisotropy obtained from TWINS ENA images and CIMI  
576 simulations using both an empirical Weimer 2K and the self-consistent RCM electric potentials  
577 for a 4-day period, 7-10 September 2015. There were two moderate storms in succession during



578 this period (See Figure 1.). In most cases, we find that the comparison of the general features of  
579 the ring current in the inner magnetosphere obtained from the observations and simulations are in  
580 agreement. Nevertheless, we do see consistent indications effects of enhanced electric shielding  
581 and localized and short time injections from the plasma sheet in the observations. The simulated  
582 partial pressure peaks are often inside the measured peaks and are more toward dusk than the  
583 measured values (See Figure 2.). There are also cases in which the measured equatorial ion  
584 partial pressure distribution shows multiple peaks that are not seen in the simulations (See Figure  
585 8.). This occurs during a period of intense AE index. The observations suggest time and  
586 spatially dependent injections from the plasma sheet that are not included in the simulations. The  
587 paths of the ions that enter the inner magnetosphere calculated with the CIMI model using the  
588 self-consistent RCM fields support this interpretation.

589 The simulations consistently show regions of parallel anisotropy spanning the night side  
590 between approximately 6 and 8  $R_E$  (See Figures 3-9.). This is thought to be a result of the  
591 increasing energy of the particles as they come enter the simulation region at 10  $R_E$  with  
592 isotropic pitch angle distributions. The particles are entering regions of stronger magnetic field  
593 so conservation of the first adiabatic invariant requires the perpendicular velocity to increase, but  
594 it is not adequate to accommodate the increase in energy. So the parallel velocity must increase.  
595 Nevertheless the parallel anisotropy is seen in the observations only during the main phase of the  
596 first storm. Localized and short time injections may produce ions that are injected with  
597 perpendicular pitch angle distributions that would result in the observed nearly isotropic pressure  
598 anisotropy.

599

600 *Acknowledgments.* OMNI solar wind data are accessible via CDAWeb at  
601 <https://cdaweb.gsfc.nasa.gov/>. TWINS data are accessible to the public at <http://twins.swri.edu>.  
602 Geomagnetic activity indices are also available from the World Data Center for Geomagnetism  
603 in Kyoto, <https://wdc.kugi.kyoto-u.ac.jp/wdc/Sec3.html>.

604 This work was supported by the TWINS mission, a part of NASA's Explorer program. We  
605 thank the World Data Center for Geomagnetism, Kyoto for supplying Real Time Dst and AE  
606 indices. We also thank the ACE and Wind plasma and magnetometer teams for L1 data and the  
607 OMNI data set for their propagation of these data.

608 Significant parts of the calculations in this study were performed on the Auburn University  
609 High Performance and Parallel Computing Facility.

610

611 **References**

- 612
- 613 Angelopoulos, V., W. Baumjohann, C. F. Kennel, F. V. Coroniti, M. G. Kivelson, R. P. R. J. W.  
614 H. Luhr, and G. Paschmann, Bursty bulk flows in the inner central plasma sheet, *J. Geophys.*  
615 *Res.*, 97, 4027--4039, doi:10.1029/91JA02701, 1992.
- 616
- 617 Angelopoulos, V., W. Baumjohann, C. F. Kennel, F. V. Coroniti, M. G. Kivelson, R. Pellat, R. J.  
618 Walker, H. Lohr, and G. Paschmann, Multi-point analysis of a bursty bulk flow event on  
619 April 11, 1985, *J. Geophys. Res.*, 101, 4967, 1996.
- 620
- 621 Angelopoulos, V., Chapman, J. A., Mozer, F. S., Scudder, J. D., Russell, C. T., Tsuruda, K.  
622 Mukai, T., Hughes, T. J. and Yumoto, K., Plasma sheet electromagnetic power generation  
623 and its dissipation along auroral field lines, *J. Geophys. Res.*, 107(A8), 1181,  
624 doi:10.1029/2001JA900136, 2002.
- 625
- 626 Angelopoulos, V., M. Temerin, I. Roth and F. S. Mozer, Testing global storm-time electric field  
627 models using particle spectra on multiple spacecraft, *J. Geophys. Res.*, 107, 1194,  
628 10.1029/2001JA900174, 2002.
- 629
- 630 Angelopoulos, V., The THEMIS mission, *Space Sci. Rev.*, 141(1–4), 5–34, doi:10.1007/s11214-  
631 008-9336-1, 2008.
- 632
- 633 Bazell, D., E. C. Roelof, T. Sotirelis, P. C. Brandt, H. Nair, P. Valek, J. Goldstein, and D.  
634 McComas, Comparison of TWINS images of low-altitude emission of energetic neutral  
635 atoms with DMSP precipitating ion fluxes, *J. Geophys. Res.*, 115, A10204,  
636 doi:10.1029/2010JA015644, 2010.
- 637
- 638 Birn, J., M. F. Thomsen, J. E. Borovsky, G. D. Reeves, D. J. McComas, and R. D. Belian,  
639 Characteristic plasma properties during dispersionless substorm injections at geosynchronous  
640 orbit, *J. Geophys. Res.*, 102, 2309, 1997.
- 641
- 642 Borovsky, J.E., M.F. Thomsen, and R.C. Elphic, The driving of the plasma sheet by the solar wind,  
643 *J. Geophys. Res.*, 103, 17,617–17,639, doi:10.1029/97JA02986, 1998.
- 644
- 645 Braginskii, S. I., Transport Processes in a Plasma, *Reviews of Plasma Physics*, 1, 205, 1965.
- 646
- 647 Brandt, P. C.:Son, E. C. Roelof, S. Ohtani, D. G. Mitchell, and B. Anderson, IMAGE/HENA:  
648 pressure and current distributions during the 1 October 2002 storm, *Adv. Space Res.*, 33,  
649 719, 2004.
- 650
- 651 Brandt, P. C.:Son, D. G. Mitchell, E. C. Roelof, and J. L. Burch, Bastille Day Storm: Global  
652 Response of the Terrestrial Ring Current, *Solar Physics*, 204, 377, 2001.

653  
654 Burch, J. L., Image mission review, *Space Sci. Rev.*, 91, 1 –14, 2000.  
655  
656 Buzulukova, N., M.-C. Fok, T. E. Moore, and D. M. Ober, Generation of plasmaspheric  
657 undulations, *Geophys. Res. Lett.*, 35, L13105, doi:10.1029/2008GL034164, 2008.  
658  
659 Buzulukova, N., M.-C. Fok, J. Goldstein, P. Valek, D. J. McComas, and P. C. Brandt, Ring  
660 current dynamics in moderate and strong storms: Comparative analysis of TWINS and  
661 IMAGE/HENA data with the Comprehensive Ring Current Model, *J. Geophys. Res.*, 115,  
662 A12234, doi:10.1029/2010JA015292, 2010.  
663  
664 Carlson, C. W., et al., The electron and ion plasma experiment for FAST, *Space Sci. Rev.*, 98,  
665 33, 2001.  
666  
667 Daglis, I. A. R. M. Thorne, W. Baumjohann, and S. Orsini, “Fine Structure” of the storm  
668 substorm relationship: ion injections during DST decrease, *Adv. Space Res.*, 25, 23698,  
669 2000.  
670  
671 Dassoulas J., D. L. Margolies, and M. R. Peterson, The AMPTE/CCE spacecraft, *IEEE Trans*  
672 *Geosci.Remote Sens.*, GE-23, 234, 1985.  
673  
674 deBoor, C., *A Practical Guide to Splines*, Springer, New York, doi:10.1007/978 1 4612 6333 3,  
675 1978.  
676  
677 De Michelis, Paola, Ioannis A. Daglis, and Giuseppe Consolini, An average image of proton  
678 plasma pressure and of current systems in the equatorial plan derived from AMPTE/CCE-  
679 CHEM measurements, *J. Geophys. Res.*, 104, 28,615, 1999.  
680  
681 Dessler, A. J., and E. N. Parker, Hydromagnetic theory of geomagnetic storms, *J. Geophys. Res.*,  
682 64, 2239–2252, doi:10.1029/JZ064i012p02239, 1959.  
683  
684 Eastwood, J. P., D. G. Sibeck, J. A. Slavin, M. L. Goldstein, B. Lavraud, M. Sitnov, S. Imber, A.  
685 Balogh, E. A. Lucek, and I. Dandouras, Observations of multiple X-line structure in the  
686 Earth's magnetotail current sheet: A Cluster case study, *Geophys. Res. Lett.*, 32 (11),  
687 L11105, doi:10.1029/2005gl022509, 2005.  
688  
689 Ebihara, Y., and M. Ejiri, Simulation study on fundamental properties of the storm time ring  
690 current, *J. Geophys. Res.*, 105(15), 15,843–15,859, doi:10.1029/1999JA900493, 2000.  
691  
692 Ebihara, Y., M. Ejiri, H. Nilsson, I. Sandahl, A. Milillo, M. Grande, J. F. Fennell, and J. L.  
693 Roeder, Statistical distribution of the storm-time proton ring current: POLAR measurements,  
694 *Geophys. Res. Lett.*, 29(20), 1969, doi:10.1029/2002GL015430, 2002.

695  
696 Ebihara, Y., M. Ejiri, Hans Nilsson, I. Sandahl, M. Grande, J. F. Fennell, J. L. Roeder, D. R.  
697 Weimer, and T. A. Fritz, Multiple discrete-energy ion features in the inner magnetosphere: 9  
698 February 1998, event. *Annales Geophysicae, European Geosciences Union*, 22 (4), pp.1297-  
699 1304, 2004.  
700  
701 Ebihara, Y., M.-C. Fok, J. B. Blake, and J. F. Fennell, Magnetic coupling of the ring current and  
702 the radiation belt, *J. Geophys. Res.*, 113, A07221, doi:10.1029/2008JA013267, 2008  
703  
704 Ebihara, Y., N. Nishitani, T. Kikuchi, T. Ogawa, K. Hosokawa, M.-C. Fok, and M. F. Thomsen,  
705 Dynamical property of storm time subauroral rapid flows as a manifestation of complex  
706 structures of the plasma pressure in the inner magnetosphere, *J. Geophys. Res.*, 114, A01306,  
707 doi:10.1029/2008JA013614, 2009.  
708  
709 Elfritz, J. G., A.M. Keesee, N. Buzulukova, M. -C. Fok, and E. E. Scime, First results using  
710 TWINS-derived ion temperature boundary conditions in CRCM, *J. Geophys. Res. Space*  
711 *Physics*, 119, 3345–3361, doi:10.1002/2013JA019555, 2014.  
712  
713 Fok, M.-C., J. U. Kozyra, A. F. Nagy, C. E. Rasmussen, and G. V. Khazanov, Decay of  
714 equatorial ring current ions and associated aeronomical consequences, *J. Geophys. Res.*, 98,  
715 19,381-19,393, 1993.  
716  
717 Fok, M.-C., T. E. Moore, and W. N. Spjeldvik, Rapid enhancement of radiation belt electron  
718 fluxes due to substorm dipolarization of the geomagnetic field, *J. Geophys. Res.*, 106, 3873–  
719 3881, doi:10.1029/2000JA000150, 2001a  
720  
721 Fok, M.-C., R. A. Wolf, R. W. Spiro, and T. E. Moore, Comprehensive computational model of  
722 the Earth’s ring current, *J. Geophys. Res.*, 106, 8417–8424, doi:10.1029/2000JA000235,  
723 2001b.  
724  
725 Fok, M.-C., T. E. Moore, G. R. Wilson, J. D. Perez, X. X. Zhang, P. C:son Brandt, D. G.  
726 Mitchell, E. C. Roelof, J.-M. Jahn, C. J. Pollock, and R. A. Wolf, Global ENA IMAGE  
727 simulations, *Space Sci. Rev.*, 109, 77-103, 2003.  
728  
729 Fok, M.-C., R. B. Horne, N. P. Meredith, and S. A. Glauert, The radiation belt environment  
730 model: Application to space weather nowcasting, *J. Geophys. Res.*, 113, A03S08,  
731 doi:10.1029/2007JA012558, 2008.  
732  
733 Fok, M.-C., N. Buzulukova, S.-H. Chen, P. W. Valek, J. Goldstein, and D. J. McComas,  
734 Simulation and TWINS observations of the 22 July 2009 storm, *J. Geophys. Res.*, 115,  
735 A12231, doi:10.1029/2010JA015443, 2010.  
736

737 Fok, M.-C., A. Glocer, Q. Zheng, R. B. Horne, N. P. Meredith, J. M. Albert, and T. Nagai,  
738 Recent developments in the radiation belt environment model, *J. Atmos. Sol. Terr. Phys.*, 73,  
739 1435–1443, 2011.  
740

741 Fok, M.-C., N. Y. Buzulukova, S.-H. Chen, A. Glocer, T. Nagai, P. Valek, and J. D. Perez, The  
742 Comprehensive Inner Magnetosphere-Ionosphere Model, *J. Geophys. Res. Space Physics*,  
743 119, 7522–7540, doi:10.1002/2014JA020239, 2014.  
744

745 Glocer, A., M.-C. Fok, T. Nagai, G. Tóth, T. Guild, and J. Blake, Rapid rebuilding of the outer  
746 radiation belt, *J. Geophys. Res.*, 116, A09213, doi:10.1029/2011JA016516, 2011.  
747

748 Gloeckler, G. et al., The charge-energy-mass (CHEM) spectrometer for 0.3 to 300 keV/e ions on  
749 AMPTE-CCE, *IEEE Trans. Geosci. Electron.*, GE-23, 234, 1985.  
750

751 Goldstein, J., and D. J. McComas, Five years of stereo magnetospheric imaging by TWINS,  
752 *Space Sci. Rev.*, 180, 39, doi:10.1007/s11214-013-0012-8, 2013.  
753

754 Goldstein, J., V. Angelopoulos, S. De Paxcuale, H. O. Funsten, W. S. Kurth, K. Llera, D. J.  
755 McComas, J. D. Perez, G. D. Reeves, H. E. Spencer, S. A. Thaller, P.W. Valek, and J. R.  
756 Wyant, Cross-scale observations of the 2015 St. Patrick’s day storm: THEMIS, Van Allen  
757 Probes, and TWINS, *J. Geophys. Res. Space Physics*, 122, 368–392,  
758 doi:10.1002/2016JA023173, 2017.  
759

760 Goldstein, J., & McComas, D. J., The big picture: Imaging of the global geospace  
761 environment by the TWINS mission. *Reviews of Geophysics*, 56,  
762 <https://doi.org/10.1002/2017RG000583>, 2018.  
763

764 Grimes, E. W., J. D. Perez, J. Goldstein, D. J. McComas, P. Valek, and D. Turner, Comparison  
765 of TWINS and THEMIS observations of proton pitch angle distributions in the ring current  
766 during the 29 May 2010 geomagnetic storm, *J. Geophys. Res. Space Physics*, 118, 4895–  
767 4905, doi:10.1002/jgra.50455, 2013.  
768

769 Groth, C.P.T., Zeeuw, D.L., Gombosi, T.I., and Powell, K.G., Global three-dimensional MHD  
770 simulation of a space weather event: CME formation, interplanetary propagation, and  
771 interaction with the magnetosphere, *J. Geophys. Res.* 105, 25053–25078, 2000.  
772

773 Hardy, D. A., L. K. Schmitt, M. S. Gussenhoven, F. J. Marshall, H. C. Yeh, T. L. Schumaker, A.  
774 Huber, and J. Pantazis, Precipitating electron and ion detectors (SSJ 4) for the block 5D  
775 Flights 6–10 DMSP satellites: Calibration and data presentation, Rep. AFGL TR 84 0317,  
776 Air Force Geophys. Lab., Hanscom Air Force Base, Mass, 1984.  
777

778 Hardy, D. A., M. S. Gussenhoven, R. Raistrick, and W. J. McNeil, Statistical and functional

779 representations of the pattern of auroral energy flux, number flux, and conductivity, J.  
780 Geophys. Res., 92, 12,275–12,294, doi:10.1029/JA092iA11p12275, 1987.  
781

782 Harel, M., R. A. Wolf, P.H. Reiff, R. W. Spiro, W. J. Burke, F. J. Rich, and M. Smiddy,  
783 Quantitative simulation of a magnetospheric substorm, 1, Model logic and overview, J.  
784 Geophys. Res., 86, 22,17- 22,41, 1981.  
785

786 Imber, S. M., J. A. Slavin, H. U. Auster, and V. Angelopoulos, A THEMIS survey of fluxropes  
787 and traveling compression regions: Location of the near-Earth reconnection site during solar  
788 minimum, J. Geophys. Res., 116, A02201, doi:10.1029/2010ja016026, 2011.  
789

790 Kistler, L. M., et al., Testing electric field models using ring current ion energy spectra from the  
791 Equator-S ion composition (ESIC) instrument, Ann. Geophys., 17, 1611, 1999.  
792

793 Kistler, Lynn M. and Douglas J. Larson, Testing electric and magnetic field models of the  
794 storm-time inner magnetosphere, J. Geophys. Res. 105, 25,221, 2000.  
795

796 Korth, H., M. F. Thomsen, J. E. Borovsky, and D. J. McComas, Plasma sheet access to  
797 geosynchronous orbit, J. Geophys. Res., 104, 25,045, 1999.  
798

798 Lin, Y., X. Y. Wang, S. Lu, J. D. Perez, and Q. Lu, Investigation of storm time magnetotail and  
799 ion injection using three-dimensional global hybrid simulation, J. Geophys. Res. Space  
800 Physics, 119, 7413–7432, doi:10.1002/2014JA020005, 2014.  
801

802 Lui, A., R. McEntire, and S. Krimigis, Evolution of the ring current during two geomagnetic  
803 storms, J. Geophys. Res., 92(A7), 7459– 7470, doi:10.1029/JA092iA07p07459, 1987.  
804

805 Lui, A. T. Y., T. Hori, S. Ohtani, Y. Zhang, X. Y. Zhou, M. G. Henderson, T. Mukai, H.  
806 Hayakawa, and S. B. Mende, Magnetotail behavior during storm time “sawtooth injections,”  
807 J. Geophys. Res., 109, A10215, doi:10.1029/2004JA010543, 2004.  
808

809 Mauk, B. H., N. J. Fox, S. G. Kanekal, R. L. Kessel, D. G. Sibeck, and A. Ukhorskiy, Science  
810 objectives and rationale for the Radiation Belt Storm Probes mission, Space Sci. Rev., 179,3  
811 –27, doi:10.1007/s11214-012-9908-y, 2013.  
812

813 McComas, D. J., H.O. Funsten, E.E. Scime, Advances in low energy neutral atom imaging, in  
814 Measurement Techniques in Space Plasmas-Fields, ed. by R.F. Pfaff, J.E. Borovsky, D.T.  
815 Young. Geophys.Monograph Series, 103 (AGU, Washington), 275B280, 1998.  
816

817 McComas, D. J. , F. Allegrini, J. Balonado, B. Blake, P. C. Brandt, J. Burch, J. Clemmons, W.  
818 Crain, D. Delapp, R. DeMajistre, D. Everett, H. Fahr, L. Friesen, H. Funsten, J. Goldstein,  
819 M. Gruntman, R. Harbaugh, R. Harper, H. Henkel, C. Holmlund, G. Lay, D. Mabry, D.  
820 Mitchell, U. Nass, C. Pollock, S. Pope, M. Reno, S. Ritzau, E. Roelof, E. Scime, M. Sivjee,

821 R. Skoug, T. S. Sotirelis, M. Thomsen, C. Urdiales, P. Valek, K. Viherkanto, S. Weidner, T.  
822 Ylikorpi, M. Young, J. Zoennchen, The Two Wide-angle Imaging Neutral-atom  
823 Spectrometers (TWINS) NASA Mission-of-Opportunity, *Space Sci. Rev.* 142, 157B231  
824 DOI:10.1007/s11214-008-9467-4, 2009a.  
825

826 McComas, D.J., F. Allegrini, P. Bochsler, M. Bzowski, E.R. Christian, G.B. Crew, R.  
827 DeMajistre, H. Fahr, H. Fichtner, P. Frisch, H.O. Funsten, S. A. Fuselier, G. Gloeckler, M.  
828 Gruntman, J. Heerikhuisen, V. Izmodenov, P. Janzen, P. Knappenberger, S. Krimigis, H.  
829 Kucharek, M. Lee, G. Livadiotis, S. Livi, R.J. MacDowall, D. Mitchell, E. Möbius, T.  
830 Moore, N.V. Pogorelov, D. Reisenfeld, E. Roelof, L. Saul, N.A. Schwadron, P.W. Valek, R.  
831 Vanderspek, P. Wurz, and G.P. Zank, Global observations of the interstellar interaction from  
832 the Interstellar Boundary Explorer (IBEX), *Science*, 326, 959-962, doi:  
833 10.1126/science.1180906, 2009b.  
834

835 McComas, D. J., N. Buzulukova, M. G. Connors, M. A. Dayeh, J. Goldstein, H. O. Funsten, S.  
836 Fuselier, N. A. Schwadron, and P. Valek, Two Wide-Angle Imaging Neutral-Atom  
837 Spectrometers and Interstellar Boundary Explorer energetic neutralatom imaging of the 5  
838 April 2010 substorm, *J. Geophys. Res.*, 117, A03225, doi:10.1029/2011JA017273, 2012.  
839

840 McEntire, R. W., E. P. Keath, D. E. Fort, A. T. Y. Lui and S. M. Krimigis, "The Medium-Energy  
841 Particle Analyzer (MEPA) on the AMPTE CCE Spacecraft," in *IEEE Transactions on*  
842 *Geoscience and Remote Sensing*, vol. GE-23, no. 3, pp. 230-233, May 1985, doi:  
843 10.1109/TGRS.1985.289518 Mitchell, D. G., S. E. Jaskulek, C. E. Schlemm, E. P. Keath, R.  
844 E. Thompson, B. E. Tossman, J. D. Boldt, J. R. Hayes, G. B. Andrews, N. Paschalidis, D. C.  
845 Hamilton, R. A. Lundgren, E. O. Tums, P. Wilson IV, H. D. Voss, D. Prentice, K. C. Hsieh,  
846 C. C. Curtis, F. R. Powell,, High Energy Neutral Atom (HENA) Imager for the IMAGE  
847 mission, *Space Sci. Rev.*, 91, 67, 2000.  
848

849 Mitchell, D. G., L. J. Lanzerotti, C. K. Kim, M. Stokes, G. Ho, S. Cooper, A. Ukhorskly, J. W.  
850 Manweller, S. Jaskulek, D. K. Haggerty, P. Brandt, M. Sitnov, N. Keika, J. F. Hayes, L. E.  
851 Brown, R. S. Gurnce, J. C. Hutcherson, K. S. Nelson, N. Paschalidis, E. Rossano, and S.  
852 Kerem, Radiation Belt Storm Probes Ion Composition Experiment RBSPICE, *Space Sci.*  
853 *Rev.*, 179, 263–308, 2013.  
854

855 Moore, T.E., D. J. Chornay, M. R. Collier, F. A. Herrero, J. Johnson, M. A. Johnson, J. W.  
856 Keller, J. F. Laudadio, J. F. Lobell, K. W. Ogilvie, J. P. Rozmarynowski, S. A. Fuselier, A.  
857 G. Ghielmetti, E. Hertzberg, D. C. Hamilton, R. Lundgren, P. Wilson, P. Walpolle, T.M.  
858 Stephen, B. L. Peko, B. Van Zyl, P. Wurz, J. M. Quinn and G. R. Wilson., The low-energy  
859 neutral atom imager for IMAGE, *Space Sci. Rev.* 91,155–195, 2000.  
860

861 Nakamura, R., W. Baumjohann, M. Brittnacher, V. A. Sergeev, M. Kubyshkina, T. Mukai, and  
862 K. Liou, Flow bursts and auroral activations: Onset timing and foot point location, *J.*



863 Geophys. Res., 106, 10,777, 2001.

864

865 Ober, D. M., J. L. Horwitz, and D. L. Gallagher (1997), Formation of density troughs embedded

866 in the outer plasma sphere by subauroral ion drift events, *J. Geophys. Res.*, 102, 14,595 –

867 14,602, doi:10.1029/97JA01046.

868

869 Perez, J. D., X.-X. Zhang, P. Cson Brandt, D. G. Mitchell, J.-M. Jahn, and C. J. Pollock,

870 Dynamics of ring current ions as obtained from IMAGE HENA and MENA ENA images, *J.*

871 *Geophys. Res.* 109, A05208, doi:10.1029/2003JA010164, 2004.

872

873 Perez, J. D., E. W. Grimes, J. Goldstein, D. J. McComas, P. Valek, and N. Billor, Evolution of

874 CIR storm on 22 July 2009, *J. Geophys. Res.*, 117, A09221, doi:10.1029/2012JA017572,

875 2012.

876

877 Perez, J. D., J. Goldstein, D. J. McComas, P. Valek, N. Buzulukova, M.-C. Fok, and H. J. Singer,

878 TWINS stereoscopic imaging of multiple peaks in the ring current, *J. Geophys. Res. Space*

879 *Physics*, 120, 368–383, doi:10.1002/2014JA020662, 2015.

880

881 Perez, J. D., J. Goldstein, D. J. McComas, P. Valek, M.-C. Fok, and K.-J. Hwang, Global images

882 of trapped ring current ions during main phase of 17 March 2015 geomagnetic storm as

883 observed by TWINS, *J. Geophys. Res. Space Physics*, 121, doi:10.1002/2016JA022375,

884 2016.

885

886 Pollock, C.J., K. Asamura, J. Baldonado, M. M. Balkey, P. Barker, J. L. Burch, E. J. Korpela, J.

887 Cravens, G. Dirks, M.-C. Fok, H. O. Funsten, M. Grande, M. Gruntman, J. Hanley, J.-M

888 Jahn, M. Jenkins, M. Lampton, M. Marckwordt, D. J. McComas, T. Mukai, G. Penegor, S.

889 Pope, S. Ritzal, M. I. Schattenburg, E. Scime, R. Skoug, M. Spurgeon, T. Stecklein, S.

890 Storms, C. Urdiales, P. Valek, J. T. M. Van Bee, S.E. Weidner, M. Wuest, M. K. Young, and

891 C. Zinsmeter, Medium Energy Neutral Atom (MENA) imager for the IMAGE mission,

892 *Space Sci. Rev.* 91, 113–154, 2000.

893

894 Pollock, C. J., K. Asamura, M. M. Balkey, J. L. Burch, H. O. Funsten, M. Grande, M. Gruntman,

895 M. Henderson, J. M. Jahn, M. Lampton, M. W. Liemohn, D. J. McComas, T. Mukai, S.

896 Ritanu, M. L. Schattenburg, E. Scime, R. Skoug, P. Valek, and M. Wuest, First medium

897 energy neutral atom (MENA) images of Earth's magnetosphere during substorm and storm-

898 time, *Geophys. Res. Letters*, 28, 1147, 2001.

899

900 Réme, H., C. Aoustin, J. M. Bosques, I. Dandouras, B. Lavraud, J. A. Sauvaud, A. Barthe, J.

901 Bouyssou, Th. Camus, O. Coeur-Joly, A. Cros, J. Cuvilo, F. Ducay, Y. Garbarowitz, J. L.

902 Medale, E. Penou, H. Perrier, D. Romefort, J. Rouzaud, C. Vallat, D. Alcayde, C. Jacquy,

903 C. Mazelle, C. d'Uston, E. Mobius, L. M. Kistler, K. Crocker, M. Granoff, C. Mouikis, M.

904 Popecki, M. Vosbury, B. Klecker, D. Hovestadt, H. Kucharek, E. Kuenneth, G. Paschmann,

905 M. Scholer, N. Sckopke, E. Seidenschwang, C. W. Carlson, D. W. Curtis, C. Ingraham, R. P.  
 906 Lin, J. P. McFadden, G. K. Parks, T. Phan, V. Formisano, E. Amata, M. B. Bavassano-  
 907 Cattaneo, P. Baldetti, R. Bruno, G. Chionchio, A. Di Lellis, M. F. Marcucci, G. Pallochia,  
 908 A. Korth, P. W. Daly, B. Braeve, M. Rosenbauer, V. Vasyliunas, M. McCarthy, M. Wilber,  
 909 L. Eliasson, R. Lundin, S. Olsen, E. G. Shelley, S. Fuselier, A. G. Ghielmetti, W.  
 910 Lennartsson, C. P. Escoubet, H. Balsiger, R. Friedel, J.-B. Cao, R. A. Kovrazhkin, I.  
 911 Papamastorakis, R. Pellat, J. Scudder, and B. Sonnerup, First multispacecraft ion  
 912 measurements in and near the Earth's magnetosphere with the identical Cluster ion  
 913 spectrometry (CIS) experiment, *Ann. Geophys.*, 19, 1303, 2001.  
 914  
 915 Roelof, E. C., ENA Emission from Nearly-Mirroring Magnetospheric Ions Interacting with the  
 916 Exosphere, *Adv. Space Res.* 20, 361, 1997.  
 917  
 918 Sckopke, N., A general relation between the energy of trapped particles and the disturbance field  
 919 near the Earth, *J. Geophys. Res.*, 71, 3125–3130, 1966.  
 920  
 921 Scudder, J., et al., HYDRA: A 3-dimensional electron and ion hot plasma instrument for the  
 922 POLAR spacecraft of the GGS mission, *Space Sci. Rev.*, 71, 459, 1995.  
 923  
 924 Slavin, J. A., R. P. Lepping, J. Gjerloev, D. H. Fairfield, M. Hesse, C. J. Owen, M. B. Moldwin,  
 925 T. Nagai, A. Ieda, and T. Mukai, Geotail observations of magnetic flux ropes in the plasma  
 926 sheet, *J. Geophys. Res.*, 108 (A1), 1015, doi:10.1029/2002ja009557, 2003.  
 927  
 928 Smith, P., and R. Hoffman, Ring current particle distributions during the magnetic storms of  
 929 December 16– 18, 1971, *J. Geophys. Res.*, 78(22), 4731–4737,  
 930 doi:10.1029/JA078i022p04731, 1973.  
 931  
 932 Spence, H. E., G. D. Reeves, D. N. Baker, J. B. Blake, M. Bolton, S. Bourdarie, A. A. Chan, S.  
 933 G. Claudepierre, J. H. Clemmons, J. P. Cravens, S. R. Elkington, J. F. Fennell, R. H. W.  
 934 Friedel, H. O. Funsten, J. Goldstein, J. C. Green, A. Guthrie, M. G. Henderson, R. B.  
 935 Honrne, M. K. Hudson, J.-M Jahn, V. K. Jordanova, S. G. Kanekal, B. W. L Klatt, B. A.  
 936 Larsen, X. Li, E. A. MacDonald, I. R. Mann, J. Niehof, T. P. O'Brien, T G. Onsaga, D  
 937 Salvaggio, R. M. Skoug, S. S. Smith, L. L. Suther, M. F. Thomsen, R. M. Thorne, Science  
 938 goals and overview of the Radiation Belt Storm Probes (RBSP) Energetic Particle,  
 939 Composition, and Thermal Plasma (ECT) suite on NASA's Van Allen Probes mission, *Space*  
 940 *Sci. Rev.*, 179, 311–336, doi:10.1007/s11214-013-0007-5, 2013.  
 941  
 942 Stern, D.P., The motion of a proton in the equatorial magnetosphere, *J. Geophys. Res.*, 80, 595,  
 943 1975.  
 944  
 945 Toffoletto, F., S. Sazykin, R. Spiro, and R. Wolf, Inner magnetospheric modeling with the Rice  
 946 convection model, *Space Sci. Rev.*, 107, 175–196, 2003.

947  
948 Tsyganenko, N .A., A magnetospheric magnetic field model with a warped tail current sheet,  
949 Planet. Space Sci., 37, 5-20, 1989.  
950  
951 Tsyganenko, N. A., and D. P. Stern, Modeling the global magnetic field of the large scale  
952 Birkeland current systems, J. Geophys. Res., 101, 27,187–27,198, doi:10.1029/96JA02735,  
953 1996.  
954  
955 Tsyganenko, N. A., and T. Mukai, Tail plasma sheet models derived from Geotail particle data,  
956 J. Geophys. Res., 108(A3), 1136, doi:10.1029/2002JA009707, 2003.  
957  
958 Tsyganenko, N. A., and M. I. Sitnov, Modeling the dynamics of the inner magnetosphere during  
959 strong geomagnetic storms, J. Geophys. Res., 110, A03208, doi:10.1029/2004JA010798,  
960 2005.  
961  
962 Vallat, C., I. Dandouras, P. X. Brandt, R. DeMajistre, D. G. Mitchesll, E. C. Roelof, H. Reme, J.-  
963 A. Sauvaud, L. Kistler, C. Mouikis, M. Dunlop, and A. Balgh, First comparisons of local ion  
964 measurements in the inner magnetosphere with energetic neutral atom magnetospheric image  
965 inversions: Cluster-CIS and IMAGE-HENA observations, J. Geophys. Res., 109, A04213,  
966 doi:10.1029/2003JA010224, 2004.  
967  
968 Volland, H., A semiempirical model of large-scale magnetospheric electric fields, J. Geophys.  
969 Res., 78, 171, 1973.  
970  
971 Wahba, G., Spline Models for Observational Data, Soc. for Ind. and Appl. Math., Philadelphia,  
972 Pa., doi:10.1137/1.9781611970128, 1990.  
973  
974 Weimer, D.R., A flexible, IMF dependent model of high-latitude electric potentials having  
975 "space weather" applications, Geophys. Res. Lett., 23, 2549, 1996.  
976  
977 Weimer, D. R., An improved model of ionospheric electric potentials including substorm  
978 perturbations and applications to the Geospace environment modeling November 24, 1996,  
979 event, J. Geophys. Res., 106, 407–416, doi:10.1029/2000JA000604, 2001.  
980  
981 Wilken, B., et al., Magnetospheric ion composition spectrometer onboard the CRRES spacecraft,  
982 Journal of Spacecraft and Rockets, 29, 585, 1992.  
983  
984 Yang, J., F. R. Toffoletto, R. A. Wolf, and S. Sazykin, On the contribution of plasma sheet  
985 bubbles to the storm time ring current, J. Geophys. Res. Space Physics, 120, 7416–7432,  
986 doi:10.1002/2015JA021398, 2015.  
987  
988 Zheng, Y., A. T. Y. Lui, and M.-C. Fok, Effects of plasma sheet properties on storm-time ring

989 current, J. Geophys. Res., 115, A08220, doi:10.1029/2009JA014806, 2010.  
990  
991 Zoennchen, J. H., U. Nass and H. J. Fahr, Terrestrial exospheric hydrogen density distributions  
992 under solar minimum and maximum conditions observed by the TWINS stereo mission, Ann.  
993 Geophys., 33, 413–426, doi:10.5194, 2105.  
994  
  
995  
  
996

997 **Figure Captions**

998

999 **Figure 1.** The solar wind parameters and geomagnetic indices for the two storms during the  
1000 period 07-10 September 2015. The data is from the OMNI data base  
1001 ([https://omniweb.gsfc.nasa.gov/html/omni\\_min\\_data.html](https://omniweb.gsfc.nasa.gov/html/omni_min_data.html)).

1002

1003 **Figure 2.** Plot of the ion equatorial pressure peak as a function of time during the 4-day period  
1004 07-10 September 2015. (a) the radial location and (b) the MLT location. The green triangles  
1005 mark the locations obtained from the TWINS ENA images, the red line from the CIMI/Weimer  
1006 simulations and the orange line from the CIMI/RCM simulations.

1007

1008 **Figure 3.** The ion equatorial pressure (first row) and pressure anisotropy (second row) for 2200  
1009 UT 07 September 2015 from the CIMI/RCM simulations (first column), from the TWINS ENA  
1010 images (second column), and the CIMI/Weimer simulations (third column). The stars mark the  
1011 location of the peaks.

1012

1013 **Figure 4.** The ion equatorial pressure and pressure anisotropy for 0400 UT 08 September 2015  
1014 in the same format as Figure 3.

1015

1016 **Figure 5.** The ion equatorial pressure and pressure anisotropy for 1600 UT 08 September 2015  
1017 in the same format as Figure 3.

1018

1019 **Figure 6.** The ion equatorial pressure and pressure anisotropy for 0200 UT 09 September 2015  
1020 in the same format as Figure 3.

1021

1022 **Figure 7.** The ion equatorial pressure and pressure anisotropy for 0400 UT 09 September 2015  
1023 in the same format as Figure 3.

1024

1025 **Figure 8.** The ion equatorial pressure and pressure anisotropy for 1800 UT 09 September 2015  
1026 in the same format as Figure 3.

1027

1028 **Figure 9.** The ion equatorial pressure and pressure anisotropy for 1700 UT 10 September 2015  
1029 in the same format as Figure 3.

1030

1031 **Figure 10.** Paths of 46 keV particles, the energy of protons at the maximum flux (See left  
1032 column.) that reach the 4 pressure peaks observed by TWINS as shown in Figure 8. The  
1033 observed pressure is shown in grey scale. The locations of the peaks are shown by black squares.  
1034 The energy of the particle is indicated by the color of the stars that are spaced 10 minutes apart.  
1035 The units of the color bars are keV. The energies span the range of the particle energies along  
1036 their paths.

1037

1038
