# Supplementary material for: Dynamics Geomagnetic Storm on 7–10 September 2015 as Observed by TWINS and Simulated by CIMI
Source: Copernicus journal article supplement (doi:10.5194/angeo-2018-64), 2018-06-25
Supplement: Supplementary file [file angeo-2018-64-AC9-supplement.pdf]

Ann. Geophys. Discuss., <https://doi.org/10.5194/angeo-2018-64-RC5>, 2018 © Author(s) 2018. This work is distributed under the Creative Commons Attribution 4.0 License.

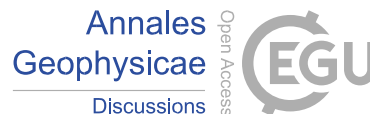

Interactive  
comment

# ***Interactive comment on “Dynamics Geomagnetic Storm on 7–10 September 2015 as Observed by TWINS and Simulated by CIMI” by Joseph D. Perez et al.***

**Anonymous Referee #2**

Received and published: 17 August 2018

This manuscript shows comparisons between models and observations of the pressure peaks in the inner magnetosphere during a storm event. The comparison reveals both consistency and significant differences between the observations and model predictions. The authors discussed the possible cause of the difference (i.e., the missing transient structures in the

Discussion paper

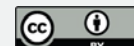

simulation). The results of this manuscript are important for future improvement of models. However, there are a few points that I would suggest the

authors to address before I recommend the manuscript for publication:

- Line 276: varies -> vary

Done. Thanks. [\[See Line 298 in revised version\]](#)

- Line 399-400: The authors start the sentence with both electric and magnetic shield-

ing but only explain magnetic shielding (gradient curvature drifts) in the later half of the sentence. The electric shielding is caused by the closure of region 2 current through the ionosphere, which creates a Peterson current, and thus electric field at lower latitudes than the region 2 current. This electric field, when mapped to the inner magnetosphere, cancels the original cross-tail electric field, so particles cannot ExB drift closer to Earth (see, e.g., Jaggi and Wolf, 1973). The electric shielding is more effective for low-energy particles. I do not think it is very important for the energy range which the authors are interested in.

Referee #1 made it clear to us that our use of the term magnetic shielding was not precise. The term has another meaning. So we have eliminated the term and replaced it with “spatially-localized, short-duration injections”.

Again in response to comments by Referee #1, this paragraph has been significantly revised as follows: (We have added a reference to Jaggi and Wolf (1973) as suggested by Referee 2.) [See Lines 421-446 in revised version.]

*Injections from the plasma sheet are thought to be the primary source of ring current protons in the inner magnetosphere, i.e., those that are observed by TWINS. Electric and magnetic fields determine the ultimate path of the injected ions, i.e., whether they reach locations close enough to the Earth where the*

*magnetic gradient and curvature drifts are strong enough to exceed the electric drift forming the ring current or whether they drift out to the magnetopause. The locations of the partial pressure peaks from the CIMI/RCM and the CIMI/Weimer 2K simulations and the TWINS observations during the 4-day period, 07-10 September 2015, show that the peaks are usually in the dusk/midnight sector. (See Figure 2b) This phenomenon is consistent with analysis of data at geosynchronous orbit (Birn et al., 1997). Nevertheless the TWINS observations show partial pressure peaks that are often at larger radii than the CIMI simulations, even when they are in the dusk/midnight sector (See Figure 2a.). The fact that the CIMI/Weimer peaks are generally closer to dusk than the CIMI/RCM. (See Figure 2b.) is consistent with simulations reported by Fok, et al. (2003). The TWINS MLT locations are closer to midnight and in the midnight /dawn sector more frequently than the CIMI results. This suggests that there are often enhanced electric shielding and effects from localized and short time injections that are not present in the*

*CIMI simulations. To understand how the electric shielding works to affect the paths of the injected particles, we note that the convection electric field from the solar wind is mapped into the magnetosphere along open field lines into the polar ionosphere. It is then shielded from penetrating to lower latitudes and therefore further into the inner magnetosphere by the Birkeland region 2 currents driven by pressure gradients in the ring current. See for example Jaggi and Wolf (1973). During geomagnetic storms when there is a sharp turn in the z-component of the interplanetary magnetic field (IMF) from negative to positive (See row 2 of Figure 1.), the accompanying electric field in the ionosphere associated with the Region 2 currents can produce what is referred to as over-shielding. There are also neutral disturbance dynamo electric fields in the ionosphere that affect electric shielding. Localized and short time injections may contribute to the complexity of these effects.*

As to the energy dependence of the effect of the electric field, it is true that for low energies where the magnetic drifts are small, the electric field is dominant. But it has been shown by

Fok et al (2003) that a self-consistent electric field in place of the Weimer electric field model moves the simulated peak of ions observed by IMAGE/HENA from the dusk side of midnight to the dawn side where it is observed. Thus it is clear that it does have an effect on the pressure in the energy we measure and simulate

- Line 455, and Line 547-548: ‘parallel pitch angle anisotropy ... first adiabatic invariant as they enter the inner magnetosphere’: The conservation of first adiabatic invariant says that when a particle moves to a stronger magnetic field, it will have more perpendicular energy. Thus, the perpendicular anisotropy should increase instead of the parallel.

The Referee is correct. That was a mis-statement. That has been replaced by the following: [See Lines 492-496]

. *As they are accelerated while conserving the first adiabatic invariant to enter the region observed by TWINS, i.e. an outer radius of  $8 R_E$ , their pitch angle distributions become parallel because the energy increase exceeds what can be absorbed in the perpendicular pitch angles while still conserving the first adiabatic invariant. One mechanism for reducing the parallel anisotropy is wave-particle interactions which are not included in the CIMI simulations..*

The key point is that the particles are increasing their energy as they enter from the tail. This is illustrated in Figure 10.

- Line 512-Line 527: This paragraph makes a strange comparison. To find the origin of the multiple pressure peaks, the authors uses particle tracing in the model, which does not have the multiple pressure peaks. As the authors said, the reason why the model cannot reproduce the observed multiple peaks is that there may be transient, small-scale structures that do not show up in the model. These structures can change the particle trajectory significantly. Therefore, the trajectories shown in the manuscript does not bear much useful information in explaining the multiple pressure peaks.

The Referee is correct in saying that the model fields that we use for the particle tracing is not one that necessarily produced the multiple peaks. The idea is that it might have if the input across the outer boundary at 10 RE in CIMI simulations had included non-isotropic, spatially localized and short-time dependent injections.

Line 537-538: ‘... indication of enhanced electric and magnetic shielding in the observations’: How can you which of these two is effective from observation? As I commented above, the electric shielding may be not very effective for the energy range considered by the authors.

As stated above we think it is clearer to speak of “enhanced electric shielding and/or spatially-localized, short-duration injections”. The Referee is correct that the relative importance of

the two effects cannot be determined from observations of the type we show here. That is why we are trying to compare observations with simulations.

As for the energy dependence of the electric shielding, the fact that it is important for more than just low energies has been demonstrated by Fok et al (2003).



Figure 2a: Which MLT is this panel showing? Figure 2b: Which radial distance is this panel showing?

It is showing the location, radial distance and MLT, of the main peak. The one marked by the star in the figures. We will add a statement to that effect. [See Lines 272-273.]

The authors have addressed all my comments so I recommend this manuscript to be accepted.

Interactive comment on Ann. Geophys. Discuss., <https://doi.org/10.5194/angeo-2018-64>, 2018.

Interactive  
comment

Discussion paper



Dynamics of a Geomagnetic Storm on 7-10 September 2015 as Observed by TWINS and  
Simulated by CIMI

Perez<sup>1</sup>, Joseph D., James Edmond<sup>1</sup>, Shannon Hill<sup>2</sup>, Hanyun Xu<sup>1</sup>, Natalia Buzulukova<sup>3</sup>, Mei-Ching Fok<sup>3</sup>, Jerry Goldstein<sup>4,5</sup>, David J. McComas<sup>6</sup> and Phil Valek<sup>4,5</sup>

<sup>1</sup>Auburn University, Auburn, AL 36849, USA

<sup>2</sup>Emory University, Atlanta, GA 30322, USA

<sup>3</sup>NASA Goddard Space Flight Center, Greenbelt, MD 20771, USA

<sup>4</sup>Southwest Research Institute, San Antonio, TX 78228, USA

<sup>5</sup>University of Texas at San Antonio, San Antonio, TX 78249, USA

<sup>6</sup>Department of Astrophysical Sciences, Princeton University, NJ 08540, USA

*Correspondence to:* J. D. Perez, perez@physics.auburn.edu

**Abstract.** For the first time, direct comparisons of the equatorial ion partial pressure and pitch angle anisotropy observed by TWINS and simulated by CIMI are presented. The TWINS ENA images are from a 4-day period, 7-10 September 2015. The simulations use both the empirical Weimer 2K and the self-consistent RCM electric potentials. There are two moderate storms in succession during this period. In most cases, we find that the general features of the ring current in the inner magnetosphere obtained from the observations and the simulations are similar. Nevertheless, we do also see consistent contrasts between the simulations and observations. The simulated partial pressure peaks are often inside the observed peaks and more toward dusk than the measured values. There are also cases in which the measured equatorial ion partial pressure shows multiple peaks that are not seen in the simulations. This occurs during a period of intense AE index. The CIMI simulations consistently show regions of parallel anisotropy spanning the night side between approximately 6 and 8  $R_E$  whereas the parallel anisotropy is seen in the observations only during the main phase of the first storm. The evidence from the unique global view provided by the TWINS observations strongly suggests that there are features in the ring current partial pressure distributions that can be best explained by enhanced electric shielding

31 and/or spatially-localized, short-duration injections..

32

33 **Key Words.** Magnetospheric physics (Storms and substorms, Magnetosphere configurations and

34 dynamics) – Space plasma physics (charged particle motion and acceleration)

## 1 Introduction

The Earth's inner magnetosphere contains a large-scale current system, the ring current, in which the current is carried by trapped ions that are injected from the magnetotail and generally drift westward. It is a major contributor to magnetic depressions measured in the Earth's equatorial region that are expressed in terms of the Dst or SYM/H indices which characterize the time-evolution of geomagnetic storms. The plasma sheet is a primary source of particles in the inner magnetosphere. Therefore understanding and predicting the dynamics of the injected particles is a key factor in understanding the formation and decay of the ring current. This challenge can be addressed by a comparison of model and simulation results with observations.

There have been many studies which compared model results to observations. Kistler and Lawson (2000) used 2 different magnetic field models, dipole and Tsy89 (Tsyganenko, 1989), along with two different electric potential models, Volland (Volland, 1973)-Stern (Stern, 1975) and Weimer96 (Weimer, 1996), to calculate ion paths in the inner magnetosphere. They compared the results with in-situ proton energy spectra measured by the Active Magnetospheric Particle Tracer Explorers (AMPTE) (Gloeckler et al, 1985) over a range of local times. They found that, in the inner magnetosphere, the electric field has a much stronger effect on the particle paths than the magnetic field and that the Weimer96 model gave a better match to the features of the observed energy spectra than the Volland-Stern model. But the energy at which the drift paths became closed, 40-50 keV, was not in agreement with the observations. It is to be noted that the effects of induction electric fields were not included in this analysis. Angelopoulos

et al. (2002) added co-rotation electric fields to Volland-Stern, Weimer 96, Weimer 2000 along with modifications to improve fits to instantaneous electric field measurements by POLAR/HYDRA (Scudder et al., 1995) and Defense Meteorological Satellite Program satellites to compare with in-situ measurements of ion spectrograms from POLAR/HTDRA, EQUATOR-S (Kistler et al., 1999) and FAST (Carlson, et al., 2001). They found differences that seemed to require the inclusion of local inductive electric fields and/or particle injections. Ebihara et al., (2004) modeled discrete energy bands observed by POLAR using a dipole magnetic field and a realistic electric field to show that changes in the convection electric field produced better results.

De Michelis et al (1999) obtained images of pressure in the equatorial plane, both orthogonal and parallel, and anisotropy using 2-year averages of proton distributions measured by AMPTE/CCE-CHEM (Dassoulas et al., 1985; Gloeckler et al., 1985). They located 2 current systems, the inner portion of the cross-tail current and the ring current during times of  $AE > 100$  nT, and both the full and partial ring current along with region 2 currents for  $100 \text{ nT} < AE < 600$  nT. Ebihara et al. (2002) compared statistically averaged data from POLAR/MICS (Wilken, et al., 1992) with simulations of proton drift paths using the Volland-Stern electric potential and found reasonable agreement. Lui, et al. (2003) used the AMPTE/CCE-CHEM and MEPA (McEntire et al., 1985) to construct the plasma pressure distribution over an extended energy range from 1 keV to 4 MeV. They found that the statistical pressure distribution obtained from the in-situ measurements differed from the results obtained from ENA images obtained from IMAGE/HENA (Brandt et al., 2004). Wang et al (2011) compared average spatial profiles of the

Time History of Events and Macroscale Interaction during Substorms (THEMIS) (Angelopoulos, 2008) in situ-observations with simulations using the Rice Convection Model (RCM) self-consistent electric and magnetic fields (Toffoletto et al, 2003). The agreement with key spatial features of the particle fluxes confirms the importance of the magnetic and electric transport in determining features of the ring current. With the advent of missions dedicated to energetic neutral atom (ENA) imaging, e.g., (1) the 3 instruments, LENA (T. E. Moore et al, 2000), MENA (Pollock et al, 2000), and HENA (Mitchell et al, 2000) on board IMAGE (Burch, 2000), (2) the Energetic Neutral Atom Detector Unit (NUADU) (McKenna-Lawlor et al, 2005), and (3) Two Wide-angle Imaging Neutral-atom Spectrometers (TWINS) (McComas et al, 2009a; Goldstein and McComas, 2013; Goldstein and McComas, 2018), it became possible to test simulations against full images of the inner magnetosphere.

Fok et al (2003) compared simulations using the CRCM (Fok et al, 2001) model with ENA images from IMAGE/MENA & HENA. They were able to match the magnitude and trends of the observed Dst but not all of the short time variations. The empirical Weimer96 electric field model was not able to explain the fact that the peaks of the proton flux in the inner magnetosphere were in the midnight/dawn sector rather than the expected dusk/midnight sector during a strong storm on 12 August 2000, but the self-consistent CRCM electric field model did explain this feature. They also used the MHD fields computed by the BATS-R-US (Block-Adaptive-Tree Solar-wind Roe Upwind Scheme) (Groth et al, 2000) model to provide electric and magnetic fields and ion temperature and density at the model boundary ( $10 R_E$ ) at the

equator to model a large storm that occurred on 15 July 2000. The simulated ENA images matched the general features of the HENA ENA images.

Buzulukova et al. (2010) studied the effects of electric shielding on ring current morphology by comparing the results of CRCM simulations from a moderate and a strong storm with ENA images from TWINS and IMAGE/HENA. The Tsy96 empirical magnetic field, the Weimer-2000 electric potential model (Weimer, 2001) and the empirical Tsyganenko and Mukai (2003) model of the plasma sheet density and temperature were employed. They achieved agreement between the magnitude and trends of the observed SYM/H and the simulated values for both storms, and were able to explain the post-midnight enhancements of the pressure due to electric shielding. They did not include the effects of inductive electric fields or time dependence due to substorms.

Fok et al (2010) used ENA images from both TWINS1 and TWINS2 along with in-situ THEMIS observations during a storm on 22 July 2009 to validate the CRCM simulations. They found that, when a time-dependent magnetic field is included, the electric potential pattern is less twisted and the ion flux peak did not move as far eastward giving better agreement with the ENA observations.

It is clear that present-day simulations are able to explain the general features of the observations of the ring current in the inner magnetosphere, both from in-situ measurements and in ENA images. It is also clear that questions remain as to the contributions of various shielding mechanisms. Self-consistent dynamic electric potentials give better results. Inclusion of magnetic induction effects is also necessary for the best results. But to date effects on short time



scales, e.g., injections from sub-storms, bubbles, and bursty bulk flows have not been included in a self-consistent manner.

It is also important to note that the cases treated have been either statistical averages or single events in which there was no evidence for multiple peaks in the ring current pressure distribution. The existence of multiple peaks, however, has been observed in data from the AMPTE Charged Particle Explorer mission (Liu et al, 1987; Ebihara et al, 1985) and in ion distributions extracted from TWINS ENA images (Perez et al., 2015).

The science question to be addressed by this study is: Are there features in the global ring current pressure that are caused by enhanced electric shielding and/or spatially-localized, short-duration injections? We present for the first time a direct comparison between simulations of ring current equatorial partial pressure and anisotropy distributions with the unique global images extracted from the TWINS ENA images. We present cases in which the general characteristics of the observed partial pressure distribution are reproduced by the simulations and others in which the observed ion partial pressure peaks are at larger radius, in different MLT sectors, and display multiple peaks that are not found in the simulations. We also compare for the first time global images of the pressure anisotropy extracted from the TWINS ENA images with the results of simulations using the Comprehensive Inner Magnetosphere Ionosphere (CIMI) model (Fok et al., 2014).

In Sect. 2, we describe the measurement of the TWINS ENA images and the process by which ion partial pressures and anisotropy are extracted, and briefly discuss how this technique has been validated against in-situ measurements. In Sect. 3, we describe the important aspects of

the CIMI model, and how it has been compared with geomagnetic activity indices, in-situ measurements, and ENA images. The particular storms on 7-10 September 2015, which are the focus of this study, are described in Sect. 4. The comparison of results of the measurements and simulations are presented in Sect. 5. They are discussed in Sect. 6. Sect. 7 summarizes the results and the conclusions.

## **2 Measurements**

### **2.1 TWINS ENA Images**

The NASA TWINS mission of opportunity (McComas et al., 2009a; Goldstein and McComas, 2013, Goldstein and McComas, 2018) obtains ENA images of the inner region of the Earth's magnetosphere. The instrument concept is described in McComas et al. (1998). Every 72 s with an integration (sweep) time of 60 s, full images are obtained. In this study, in order to obtain sufficient counts for the deconvolution process described in Sect. 2.2, the images are integrated over 15-16 sweeps. This means data is collected for ~15 min over an ~ 20 min time period. The energies of the neutral atoms span a range from 1-100 keV/amu. In the images used in this study, the energy bands are such that  $\Delta E/E = 1.0$  for H atoms. In order to enhance the processed image, a statistical smoothing technique and background suppression algorithms described in detail in Appendix A of McComas et al. (2012) are employed. This combined approach is an adapted version of the statistical smoothing technique used successfully for IBEX (McComas et

al., 2009b) data.

## **2.2 Ion Pressures**

For the comparison with simulation results using the CIMI program (See Sect. 3.), the spatial and temporal evolution of equatorial ion partial pressure and pressure anisotropy are routinely obtained from the TWINS ENA images. To extract this information from the ENA images, the ion equatorial pitch angle distribution is expanded in terms of tri-cubic splines (deBoor, 1978). To fit the data and to obtain a smooth solution, the sum of normalized chi-squared and a penalty function derived by Wahba (1990) is minimized. The penalty function is what produces the smoothness of the result (in the sense of a minimum second derivative), and the normalized chi-square is what ensures that the calculated image corresponds to the measured ENA image. This means that the spatial structure obtained in the equatorial ion partial pressure distributions is no more than is required by the observations (Perez et al, 2004). In order to obtain pressures from the energy dependent ENA images, which are integrated over energy bands with widths equal to the central energy, e.g., 40 keV images are integrated from 20-60 keV, a technique using singular valued decomposition as described in Perez, et al., (2012, Appendix B) is employed. The energy range included in the partial pressures presented in this paper is 2.5-97.5 keV, i.e., the energy range observed by TWINS. It is to be noted that higher energies do make significant contributions to the total ring current pressure. (Smith and Hoffman, 1973)

In order to obtain the ion distributions from the ENA images, models for both the magnetic

field and the exospheric neutral hydrogen density are required. In this study, we use the Tsyganenko and Sitnov (2005) magnetic field model and the TWINS exospheric neutral hydrogen density model (Zoennchen, et al, 2015).

We must also deal with the fact that there are two components to the ENA emissions: the energetic ions created in charge exchange interactions with neutral hydrogen in the geocorona, the so-called high altitude emissions (HAE), and those due to charge exchange with neutral oxygen at low altitudes (below  $\sim 600$  km), the so-called low altitude emissions (LAE) (Roelof, 1997). The former are treated as optically thin emissions, and the latter with a thick target approximation developed by Bazell et al. (2010) and validated by comparisons with DMSP data (Hardy et al., 1984).

A full range of the ion characteristics obtained from the TWINS ENA images have been compared with in-situ measurements. Measurements of the spatial and temporal variations of the flux in specific energy bands from the Time History of Events and Macroscale Interactions during Substorms (THEMIS) (Angelopoulos, 2008) have been compared with ion flux obtained from the TWINS ENA images (Grimes et al, 2013; Perez et al, 2015). A similar comparison (Perez et al, 2016) has been made with measurements made on the Van Allen Probes (formerly known as the Radiation Belt Storm Probes (RBSP) A and B) (Mauk et al., 2013; Spence et al., 2013) by the Radiation Belt Storm Probes Ion Composition Experiment (RBSPICE) (Mitchell et al., 2013) instrument. Pitch angle distributions and pitch angle anisotropy have been compared with THEMIS observations (Grimes et al, 2013). Energy spectra have also been compared with THEMIS measurements (Perez et al, 2012). Partial pressure and anisotropy from TWINS have

been compared with RBSP-SPICE-A (Perez et al, 2016) observations. While the in-situ measurements show more detailed temporal and spatial features, there is good agreement with the overall trends. Goldstein et al (2017) compared the TWINS ENA images with in-situ data from THEMIS and the Van Allen probes. They found evidence for bursty flows and ion structures in the plasma transport during the 2015 St. Patrick's day storm.

### **3 The CIMI Model**

The CIMI model is a combination of the Comprehensive Ring Current Model (CRCM) (Fok et al, 2001b) and the Radiation Belt Environment (RBE) model (Fok, et al., 2008). The CRCM is a combination of the classic Rice Convection Model (RCM) (Harel et al, 1981) and the Fok kinetic model (Fok et al., 1993).

The CRCM simulates the evolution of an inner magnetosphere plasma distribution that conserves the first two adiabatic invariants. The Fok kinetic model solves the bounce-averaged Boltzmann equation with a specified electric and magnetic field to obtain the plasma distribution. It is able to include arbitrary pitch angles with a generalized RCM Birkeland current algorithm. The Fok model advances in time the ring current plasma distribution using either a self-consistent RCM field or the semi-empirical Weimer electric field model. A specified height-integrated ionospheric conductance is required for the RCM calculation of the electric field. The Hardy model (Hardy et al., 1987) provides auroral conductance. Losses along the particle drift paths are a key feature of the CIMI model. The CIMI pressure distributions utilized in this study

cover an energy range from 75 eV to 133 keV.

Simulated results from CIMI or its predecessors have been tested against a variety of measurements from a number of satellite missions. Some examples are: (1) AMPTE/CCE (Fok et al., 2001b), (2) IMAGE ENA images (Fok et al., 2003), (3) Polar/CEPPAD (Ebihara et al., 2008), (4) IMAGE/EUV (Buzulukova et al., 2008), (5) TWINS ENA images (Fok, et al., 2010), (6) Radiation belt measurements and Akebono (Glocer, et al., 2011), (7) TWINS plasma sheet boundary conditions (Elfritz, et al., 2014), and (8) TWINS ENA images and Akebono (Fok et al., 2014). Using the Dessler-Parker-Schopke relation (Dessler and Parker, 1959; Schokpe, 1966), it has also been shown that the simulated CIMI pressures match well the observed SYM/H. (See Figure 9, Buzulukova et al., 2010). In this study, we present the first direct comparison between CIMI and TWINS ion partial pressure and anisotropy.

Important input to the CIMI simulations are the particles injected into the inner magnetosphere along the outer boundary of the simulation. In the simulations shown here, it has been assumed that the particles have a Maxwellian distribution with density and temperature determined by a linear relationship to the solar wind density and velocity respectively (Ebihara and Ejiri, 2000; Borovsky et al., 1998). A 2 hour time delay between the arrival of the solar wind parameters at the nose of the magnetopause and its effect on the ions crossing into the inner magnetosphere also has been assumed (Borovsky et al. 1998). The pitch angle distribution of the incoming ions is taken to be isotropic.

Results from simulations with the CIMI model using two different forms of the electric potential are compared in this investigation. One is the Weimer 2K empirical model (Weimer,

2001) and the other is a self-consistent electric potential from RCM.

#### **4 The 7-10 September 2015 Storms**

Figure 1 shows solar wind parameters and geomagnetic activity indices from the OMNI data service for 4 days, i.e., 7-10 September 2015. During this 4-day period, there were two SYM/H minima in succession. The first came early on 8 September 2015 after a 1-day long main phase on 7 September 2015. The minimum SYM/H was approximately -90 nT, so it was a relatively weak storm. There was a rapid recovery for approximately 3 hours coinciding with a sharp transition of  $B_z$  from negative, i.e., -8 or -9 nT, to positive, i.e., +18 or +19 nT along with a sharp transition of  $B_y$  from positive, i.e., +5 nT, to negative, i.e., -12 or -13 nT. There was also a sharp spike in the solar wind density at the inception of this first recovery phase. After the recovery was completed, there followed about a 12-hour period of near 0 nT SYM/H. The main phase of the second storm showed a relatively steady decline in SYM/H to a minimum near -110 nT in about 12 hours. The recovery from this second minimum was slow with a duration of about 1½ days. The second main phase and minimum corresponded to a slow swing of  $B_z$  back to negative and  $B_y$  to a slightly negative value. Also to be noted is the strong AE index, indicative of possible substorm activity during the main phases and early recovery of both minima. There is also some AE activity near the end of the second storm. During those same periods, the ASY/H index also had significant values during the main phase and early recovery of both minima. (See Figure 1.)

## 5 Results

### 5.1 Comparison of the Location of the Equatorial Ion Partial Pressure Peaks

Figure 2 shows the location of the equatorial ion partial pressure peaks as measured from the TWINS ENA images (green diamonds) and simulated by CIMI with both the Weimer 2K (red lines) and the RCM (orange lines) electric fields. Figure 2a is the radial location for the four days of the 07-10Sep2015 storms, and Figure 2b is the MLT location.

The radial positions of the partial pressure peaks for the CIMI simulations are similar, i.e., about  $4 R_E$ , for both the Weimer 2K and the RCM electric potentials. The RCM results do show more variation. Many of the radial positions for the TWINS observations are also near  $4 R_E$ , but others are at larger values. The MLT locations of the peaks are generally in the dusk/midnight sector. This is consistent with statistical analysis of proton fluxes from the database of the magnetospheric plasma analyzer (MPA) instrument aboard Los Alamos satellites at geosynchronous orbit (Korth et al., 1999). But the CIMI simulations, with both the Weimer 2K and RCM potentials, show a brief time early on 8 September 2015 where some of the peaks are in the midnight/dawn sector. Given the assumed 2 hour delay in the propagation of the solar wind parameters into the inner magnetosphere, this seems to correlate with a sharp swing in  $B_y$  shown in Figure 1. The TWINS observations show several instances of the partial pressure peaks being near midnight and in the midnight/dawn sector. As described earlier, ion flux peaks



in this region have been seen from ENA images for very strong storms (Fok et al, 2003).

## **5.2 Comparison of Equatorial Ion Partial Pressure Peaks and Anisotropies at Specific Times**

The following subsections will examine in detail a number of specific times during these two storms in order to address similarities and differences in the simulations with an empirical and a self-consistent electric field model and with observations. One apparent difference in what follows is the magnitude of the equatorial partial pressure for the three cases. The maximum on the colorbars for Figures 3-9 were chosen to be different for each time in order to emphasize the spatial dependence of the pressure distribution. The maxima for the two CIMI simulations are very similar, i.e., the RCM vary from 20-38 nPa and the Weimer 2K from 15-30 nPa. But the maxima of the TWINS peaks vary from 1-4 nPa, which is significantly smaller.

The magnitude of the ion intensities derived from the ENA images has been addressed in several previous comparisons with in-situ measurements. Vallat et al. (2004) compared Cluster-CIS (Réme et al., 2001) and IMAGE-HENA observations and found that for relatively strong fluxes, the agreement was excellent for two cases, but for another the ion flux determined from the ENA images was somewhat higher than the in-situ observations and in another it was significantly lower. Grimes et al. (2013) compared THEMIS (Angleopoulos, 2008) spectral measurements with spectra obtained from TWINS ENA images and found that the in-situ fluxes were a factor of 3 times greater than those obtained from the ENA images. Perez et al. (2016)

compared 30 keV ion fluxes obtained from TWINS ENA images with in-situ measurements by RBSPICE-A (Mauk et al., 2013) and found good agreement in both the average time dependent trend and in the magnitude. The in-situ measurements, of course, showed more structure given their much higher spatial and temporal resolution. Goldstein et al. (2017) analyzed data from THEMIS, Van Allen probes, and TWINS for a large storm to find that the ion fluxes obtained from the ENA images were generally lower than those from the in-situ measurements. They also found significant variations in the in-situ data. So while some part of the difference in the partial pressures obtained from TWINS measurements and CIMI simulations are due to the larger energy range included in the CIMI pressures, it is not the entire explanation. The issue of the absolute magnitude remains an important, unresolved issue, but the fluxes obtained from ENA images have been shown to reflect the global structure of the trapped ring current particles, and that is the emphasis in this study.

### **5.2.1 2200 UT 07 September 2015**

Figure 3 shows the equatorial partial pressure profiles and the pressure anisotropy from the CIMI/RCM simulation, the TWINS observations, and the CIMI/Weimer 2K simulation at 2200 UT 07 September 2015. This was late in the main phase of the first storm (See Figure 1.). The radial locations of the peaks differ by less than 1  $R_E$ . The MLT locations of the partial pressure peaks, however, differ by 3 hours in MLT. While the TWINS peak is near midnight, the CIMI peaks are well into the dusk/midnight sector with the CIMI/Weimer even closer to dusk. Results

for the Weimer96 when compared with the RCM for a very strong storm showed even greater shielding for the RCM when compared to the empirical Weimer model (Fok et al., 2003). Note, however, that for this weaker storm, the MLT spread in the peaks of the partial pressure distributions do overlap. It is also to be noted that the TWINS results show more radial structure.

The pressure anisotropy shown in Figure 3 is defined as

$$A = \frac{P_{\perp} - P_{\parallel}}{P_{\perp} + P_{\parallel}}$$

with

$$\begin{Bmatrix} P_{\perp} \\ P_{\parallel} \end{Bmatrix} = 2\pi \int_{-1}^{+1} d \cos \alpha \begin{Bmatrix} \sin^2 \alpha \\ 2 \cos^2 \alpha \end{Bmatrix} \left( \int_0^{\infty} dE \sqrt{2mE} F(E, n, \cos \alpha) \right)$$

where  $\alpha$  is the ion pitch angle,  $E$  is the ion energy,  $n$  is the ion density,  $m$  is the ion mass and  $F(E, n, \cos \alpha)$  is the number flux per unit area, energy, time, steradian. This definition is derived from Braginskii (1965) and is consistent with previous formulations, e.g., Lui et al. (1987).

The pressure anisotropy at the pressure peaks is somewhat perpendicular in all 3 cases. We also note a region of parallel anisotropy at  $R > 6-7 R_E$  from pre-midnight to dawn in all 3.

### 5.2.2 0400 UT 08 September 2015

Figure 4 shows results for 0400 UT 08 September 2015 in the same format. This was early in the rapid recovery phase of the first minimum in SYM/H. (See Figure 1.) The radial location of

the partial pressure peaks again differ by less than 1  $R_E$ . This time, however, all the peaks are in the dusk/midnight sector. Again the CIMI/Weimer 2K is closer to dusk than the CIMI/RCM pressure profiles. The TWINS peak is between the two simulations. The CIMI/Weimer 2K pressure distribution is more symmetric than the others even though the ASY/H shown in Figure 1 is  $> 50$  nT. The region of parallel pressure anisotropy in the CIMI results does not appear in the TWINS results which are more nearly isotropic in general compared to the CIMI simulations.

### **5.2.3 1600 UT 08 September 2015**

Figure 5 shows results for 1600 UT 08 September 2015 in the same format. This was during the period of near 0 nT SYM/H between the two storm minima. It was during a time period when both  $B_z$  and  $B_y$  are positive (See Figure 1.). Again the radial location of the partial pressure peaks are similar. The TWINS peak, however, has moved to the noon/dusk sector. It has continued to move westward from its positions in Figures 3 and 4. This could be the classic drift due to magnetic field gradient and curvature as originally observed in IMAGE/HENA ENA images by Brandt et al., (2001). In contrast to the TWINS pressure profile, the CIMI pressures reflect a nearly symmetric ring current. While ASY/H was relatively low at this time, it did show a small peak (See Figure 1.). Both the CIMI/RCM and the CIMI/Weimer 2K results show a region of parallel pressure anisotropy at large radii that almost circles the Earth. The TWINS results show only perpendicular pressure anisotropy.

#### **5.2.4 0200 UT 09 September 2015**

Figure 6 shows results for 0200 UT 09 September 2015 in the same format. This is early in the main phase of the second minimum in SYM/H (See Figure 1.). The TWINS equatorial ion partial pressure peak is at a larger radius and in the midnight/dawn sector in contrast to the CIMI results where the peaks are in the dusk/midnight sector. There is considerably more spatial structure in the TWINS results. The strongest TWINS peak extends well into the dusk/midnight sector with a region near the same location as the CIMI peaks and with another at a larger radius in the dusk/midnight sector. There is an even larger difference in the pressure anisotropy. The parallel region at large radii in the CIMI result is even more parallel but is again absent in the TWINS result. The small intense parallel region at very small radius in the TWINS plot is a region of very low flux and therefore not a reliable ratio. At this time, the AE index was rising sharply as was the ASY/H index (See Figure 1.).

#### **5.2.5 0400 UT 09 September 2015**

Figure 7 shows results for 0400 UT 09 September 2015 in the same format. This was just 2 hours later than the time shown in Figure 6. It was near the end of the main phase of the second minimum in SYM/H (See Figure 1.). Again the TWINS peak is in the midnight/dawn region whereas the CIMI peaks appear in the dusk/midnight region, but the radial location is very nearly the same. This time, however, the TWINS peak extends past dawn and not into the pre-midnight

region. Even though the MLT location of the CIMI/RCM and the CIMI/Weimer 2K peaks are nearly the same, the CIMI/Weimer 2K maximum extends to almost noon. The pressure anisotropy shows features very similar to those seen 2 hours previously (See Figure 6.) .The AE index has been at fairly high values for about an hour and the ASY/H index is beginning to rise sharply again (See Figure 1.).

#### **5.2.6 1800 UT 09 September 2015**

Figure 8 shows results from 1800 UT 09 September 2015 in the same format. At this time SYM/H (See Figure 1.) shows that the second storm was a few hours into a slow recovery. There are 4 distinct peaks in the TWINS equatorial ion partial pressure distribution. The highest is at large radius, about 7  $R_E$ , in the dusk/midnight sector. There is another lower peak, also at large radius in the noon/dusk sector. There are two peaks at a similar radius as the CIMI peaks. This interval is an example of multiple peaks in the ring current that have been inferred from in-situ measurements (Liu et al., 1987), and seen in analysis of ENA images (Perez et al., 2015). The parallel pressure anisotropy in the CIMI results is again present, but it is smaller and weaker than at previous times. Again TWINS does not show this feature.

#### **5.2.7 1700 UT 10 September 2015**

Figure 9 shows results from 1700 UT 10 September 2015 in the same format. At this time the

second storm was well into its slow recovery, SYM/H was beginning a small dip, there was a peak in the AE index, and ASY/H had a weak peak. (See Figure 1.) The partial pressure profiles for CIMI/RCM and CIMI/Weimer 2K are symmetrical with a peak in the dusk/midnight sector. The TWINS partial pressure peak is closer to dusk. This interval is in contrast to results at earlier times in the storm. The TWINS partial pressure peak is at a larger radius, and there is very little flux in the dawn/noon sector. The CIMI pressure anisotropies again show a region of strong parallel pitch angles that is not seen in TWINS.

## **6 Discussion**

Injectons from the plasma sheet are thought to be the primary source of ring current protons in the inner magnetosphere, i.e., those that are observed by TWINS. Electric and magnetic fields determine the ultimate path of the injected ions, i.e., whether they reach locations close enough to the Earth where the magnetic gradient and curvature drifts are strong enough to exceed the electric drift forming the ring current or whether they drift out to the magnetopause. The locations of the partial pressure peaks from the CIMI/RCM and the CIMI/Weimer 2K simulations and the TWINS observations during the 4-day period, 07-10 September 2015, show that the peaks are usually in the dusk/midnight sector. (See Figure 2b) This phenomenon is consistent with analysis of data at geosynchronous orbit (Birn et al., 1997). Nevertheless the TWINS observations show partial pressure peaks that are often at larger radii than the CIMI simulations, even when they are in the dusk/midnight sector (See Figure 2a.). The fact that the

CIMI/Weimer peaks are generally closer to dusk than the CIMI/RCM. (See Figure 2b.) is consistent with simulations reported by Fok, et al. (2003). The TWINS MLT locations are closer to midnight and in the midnight /dawn sector more frequently than the CIMI results. This suggests that there are often enhanced electric shielding and effects from localized and short time injections that are not present in the CIMI simulations. To understand how the electric shielding works to affect the paths of the injected particles, we note that the convection electric field from the solar wind is mapped into the magnetosphere along open field lines into the polar ionosphere. It is then shielded from penetrating to lower latitudes and therefore further into the inner magnetosphere by the Birkeland region 2 currents driven by pressure gradients in the ring current. During geomagnetic storms when there is a sharp turn in the z-component of the interplanetary magnetic field (IMF) from negative to positive (See row 2 of Figure 1.), the accompanying electric field in the ionosphere associated with the Region 2 currents can produce what is referred to as over-shielding. See for example Jaggi and Wolf (1973). There are also neutral disturbance dynamo electric fields in the ionosphere that affect electric shielding. Localized and short time injections may contribute to the complexity of these effects.

Looking in detail reveals an even more complex story. Figures 3-9 show comparisons of the partial pressure profiles during different phases of the storms. In the main phase of the first storm (See Figure 3.), while there is a significant AE index and ASY/H asymmetry (See Figure 1.), the observed TWINS peak is at midnight while the simulated peaks are more toward dusk. During the rapid recovery phase of the first storm, (See Figure 4.) when the AE index is smaller (See Figure 1.), the observed and simulated partial pressure peaks are at approximately the same



radius, and all are in the dusk/midnight sector. During the period between the two storms (See Figure 5.) when there is very little geomagnetic activity, i.e., SYM/H near 0 nT (See Figure 1.), the observed partial pressure peak has drifted more westward than the simulated peaks, even going past dusk (See Figure 5.). Another feature to note is the symmetry of the ring current in the CIMI simulations whereas the TWINS observations show a gap in the dawn/noon sector. The ASY/H index shows a small peak at this time (See Figure 1.) This suggests time dependence in the electric and magnetic fields that is not present in the CIMI simulations.

It is in the second storm (Figures 6-8) that the TWINS observations begin to show more spatial and temporal structure than the CIMI simulations. In Figure 6, early in the main phase, the TWINS observations show the main partial pressure peak near 6  $R_E$  and 3 MLT while the simulated peaks are near 4  $R_E$  and 20 MLT. But there is also a strong observed pressure region in the same area as the simulated peaks. Just 2 hours later, the simulated pressure shows little change, but the observed main peak extends farther eastward, and the relative pressure in the dusk/midnight region has weakened relative to the main peak. Fourteen hours later in the recovery phase of the second storm, the simulated peaks have not changed significantly, whereas the TWINS observed peaks are dramatically different (See Figure 8.). There are 4 pressure peaks. The strongest peak is at 7  $R_E$  and just westward of midnight. At smaller radii, there is a weaker peak near the location of the simulated peaks as well as one on the dawn side past midnight. There is another weaker peak at large radius near noon. It should be noted that there is strong AE activity and that ASY/H has significant values during this period (See Figure 1.). This activity suggests that there may be variations in the electric and magnetic fields produced

by spatial and time dependence of the location of the ion injections that are not present in the CIMI simulations.

The increased structure in the partial pressure distributions as observed by TWINS is especially dramatic during the recovery phase of the second storm. (See Figure 8.) There is strong AE activity and the largest values of ASY/H during this period. In the late recovery of the second storm (See Figure 9.), the CIMI simulations show a symmetric ring current as expected (Pollock et al., 2001). The TWINS results are not symmetric and have a peak at large radius in the dusk/midnight sector. There is some AE activity and a rise in the ASY/H index at this time.

Figures 3-9 also show comparisons of the pressure anisotropy during the different phases of the storm. The pressure anisotropies at the partial pressure peaks are generally in good agreement among the 3 results presented here, i.e., the pitch angle distributions are more perpendicular than parallel. The CIMI simulations, however, show a consistent region of parallel anisotropy at radii outside the pressure peak. The degree to which the pitch angle distributions are more parallel increases until the early recovery phase of the second storm (See Figure 8.) where it weakens but then strengthens again in the late recovery phase. This feature is seen by TWINS only in the main phase of the first storm (See Figure 3.) and perhaps very faintly in the early recovery phase of the second storm. (See Figure 8.) The ions that are injected at the boundary of the CIMI simulations, located at  $10 R_E$  for those shown here, have an isotropic pitch angle distribution. As they are accelerated while conserving the first adiabatic invariant to enter the region observed by TWINS, i.e. an outer radius of  $8 R_E$ , their pitch angle distributions become parallel because the energy increase exceeds what can be absorbed in the perpendicular

pitch angles while still conserving the first adiabatic invariant. One mechanism for reducing the parallel anisotropy is wave-particle interactions which are not included in the CIMI simulations..

Another possible contributing factor to the differences between the observations and simulations is the input to the CIMI model used in these simulations. Following Fok et al.(2014), the ion distribution at the boundary of the CIMI simulations in this study is an isotropic, Maxwellian distribution at a radius of  $10 R_E$  at all MLT. The density and temperature of the Maxwellian is taken to have a linear relation to the solar wind density and solar wind velocity respectively (Borovsky et al., 1998; Ebihara and Ejiri, 2000). This produces a relatively smooth time variation in the input which has been shown to be successful in matching the general features of SYM/H (Buzulukova et al., 2010), but does not match the more rapid variations as a function of time. It has also been shown that varying the spatial dependence of the input along the boundary can have a significant effect on the location of the pressure peaks (Zheng et al., 2010). Likewise Buzulukova et al. (2010) showed that input of non-isotropic pitch angle distributions can affect the comparison between the CIMI simulations and the ENA observations.

There is significant experimental evidence for temporal and spatial variations in the injection of ions into the trapped particle region of the ring current (e.g., Birn et al., 1997; Daglis et al., 2000; Lui et al., 2004). Bursty bulk flows associated with near-Earth magnetic reconnection events have been frequently observed in the magnetotail (Angelopoulos et al., 1992). These fast flows have been observed to have a  $1-3 R_E$  width in the dawn-dusk direction (e.g., Angelopoulos et al., 1996; Nakamura et al., 2001; Angelopoulos et al., 2002). Magnetic flux ropes flowing

Earthward have also been observed (e.g., Slavin et al., 2003; Eastwood et al., 2005; Imber et al., 2011). Short time, spatially limited injections into the inner magnetosphere have also been seen in 3D hybrid simulations. (e.g. see Lin et al., 2014.) Thus it is reasonable to suppose that the additional spatial and temporal structure in the partial pressure profiles observed during this storm is due to effects not yet incorporated into the simulations.

Buzulukova et al. (2008) combined the Comprehensive Ring Current Model (CRCM) (Fok et al., 2001) and the Dynamical Global Core Plasma Model (Ober et al., 1997) to model features of the plasma sphere observed by the Extreme UltraViolet (EUV) instrument on the Imager for Magnetosphere-to-Aurora Global Exploration (IMAGE) (Burch, 2000) on 17 April 2002. They found that injections from the plasma sheet that were localized in magnetic local time (MLT) explained observed undulations of the plasmasphere. Some features of an inductive electric field were included through the use of a time dependent magnetic Tsy96 (Tsyganenko and Stern, 1996) magnetic field model.

Likewise, Ebihara et al. (2009) compared CRCM simulations with midlatitude Super Dual Auroral Radar Network (SuperDARN) Hokkaido radar observations of fluctuating ionospheric flows on 15 December 2006. Using input from geosynchronous satellites to model the temporal and spatial variations of the plasma sheet input to the inner magnetosphere, they were able to show that the resulting pressure variations in the ring current were responsible for field aligned currents and matched the dynamics of the observed subauroral flows. The results from the CRCM also showed multiple pressure peaks inside of 4  $R_E$ . This is indicative of a strong

connection between the dynamics of the ring current pressure distribution and the rapid temporal characteristics of the subauroral plasma flow during a geomagnetic storm.

The comparisons between the observations and the simulations presented here give a view not available from in-situ measurements. To further elucidate this phenomenon, we present in Figure 10 the paths of particles injected into the inner magnetosphere calculated using the CIMI simulations that provide additional support for concluding that the observations may show effects from enhanced electric shielding and localized and short time injections. The focus is upon the time 1800 UT on 9 September 2015 during the second storm. As shown in Figure 8, the TWINS observations show multiple peaks in contrast to the single peak in the CIMI simulations. For each of the 4 partial pressure peaks observed by TWINS, we show the energy spectrum (left column) and the paths of particles that reach the location of the pressure peaks (right column). The energy spectra show two energy maxima, one below 20 keV and the largest maxima above 40 keV. The ion paths are calculated with the CIMI model using the RCM fields. The path shown is of a particle with an energy of 46 keV when it reaches the respective pressure peaks, i.e., the energy at the maximum of the energy spectra shown in the left hand column. The TWINS partial pressure configuration from Figure 8 is repeated in gray scale so as to highlight the paths. In each case the pressure peak is shown by a black square. Along the path there are stars every 10 minutes. The color of the stars indicate the ion energy as it moves along its path. (See color bar.)

For Peak 1, the 46 keV particle enters at 10  $R_E$  in the midnight/dawn sector. The time from injection to reaching this peak in the outer magnetosphere is approximately 20 minutes. For

Peak 2, which is at a smaller radius, a 46 keV ions arrives at the peak from the dawn/midnight sector after approximately 2 ½ hours. This peak observed by TWINS is very near the pressure peak that appears in the CIMI simulations. (See Figure 8.) Peak 3 is at a similar radius as Peak 2, but it is on the dawn side of midnight. The path of a 46 keV particle followed backwards in time from this peak location does not show an injection location after completing nearly 3 orbits of the Earth in approximately 12 hours. This partial pressure peak observed by TWINS may not be consistent with the RCM fields in the CIMI model. Peak 4 is in the noon/dusk sector. A 46 keV particle reaches this peak after approximately 3 ¾ hours and 1 orbit of the Earth. It enters the inner magnetosphere in the same sector, i.e., the midnight/dawn sector, as the particle that reached the location of Peak 1, but it was injected much earlier. The different locations and times of the entrance of the ions at the peaks of the energy spectra of the 4 pressure peaks 1, 2, and 4 observed by TWINS at 1808 UT on 9 September 2015 suggest spatial and temporal variations in the injections from the plasma sheet. The fact that the calculated path for Peak 3 does not show an injection may indicate variations in the fields not captured in the models.

## **7 Summary and Conclusions**

We have presented, for the first time, direct comparisons of the equatorial ion partial pressure distributions and pitch angle anisotropy obtained from TWINS ENA images and CIMI simulations using both an empirical Weimer 2K and the self-consistent RCM electric potentials for a 4-day period, 7-10 September 2015. There were two moderate storms in succession during

578 this period (See Figure 1.). In most cases, we find that the comparison of the general features of  
579 the ring current in the inner magnetosphere obtained from the observations and simulations are in  
580 agreement. Nevertheless, we do see consistent indications effects of enhanced electric shielding  
581 and localized and short time injections from the plasma sheet in the observations. The simulated  
582 partial pressure peaks are often inside the measured peaks and are more toward dusk than the  
583 measured values (See Figure 2.). There are also cases in which the measured equatorial ion  
584 partial pressure distribution shows multiple peaks that are not seen in the simulations (See Figure  
585 8.). This occurs during a period of intense AE index. The observations suggest time and  
586 spatially dependent injections from the plasma sheet that are not included in the simulations. The  
587 paths of the ions that enter the inner magnetosphere calculated with the CIMI model using the  
588 self-consistent RCM fields support this interpretation.

589 The simulations consistently show regions of parallel anisotropy spanning the night side  
590 between approximately 6 and 8  $R_E$  (See Figures 3-9.). This is thought to be a result of the  
591 increasing energy of the particles as they come enter the simulation region at 10  $R_E$  with  
592 isotropic pitch angle distributions. The particles are entering regions of stronger magnetic field  
593 so conservation of the first adiabatic invariant requires the perpendicular velocity to increase, but  
594 it is not adequate to accommodate the increase in energy. So the parallel velocity must increase.  
595 Nevertheless the parallel anisotropy is seen in the observations only during the main phase of the  
596 first storm. Localized and short time injections may produce ions that are injected with  
597 perpendicular pitch angle distributions that would result in the observed nearly isotropic pressure  
598 anisotropy.

599

600 *Acknowledgments.* OMNI solar wind data are accessible via CDAWeb at  
601 <https://cdaweb.gsfc.nasa.gov/>. TWINS data are accessible to the public at <http://twins.swri.edu>.  
602 Geomagnetic activity indices are also available from the World Data Center for Geomagnetism  
603 in Kyoto, <https://wdc.kugi.kyoto-u.ac.jp/wdc/Sec3.html>.

604 This work was supported by the TWINS mission, a part of NASA's Explorer program. We  
605 thank the World Data Center for Geomagnetism, Kyoto for supplying Real Time Dst and AE  
606 indices. We also thank the ACE and Wind plasma and magnetometer teams for L1 data and the  
607 OMNI data set for their propagation of these data.

608 Significant parts of the calculations in this study were performed on the Auburn University  
609 High Performance and Parallel Computing Facility.

610



## References

- Angelopoulos, V., W. Baumjohann, C. F. Kennel, F. V. Coroniti, M. G. Kivelson, R. P. R. J. W. H. Luhr, and G. Paschmann, Bursty bulk flows in the inner central plasma sheet, *J. Geophys. Res.*, 97, 4027--4039, doi:10.1029/91JA02701, 1992.
- Angelopoulos, V., W. Baumjohann, C. F. Kennel, F. V. Coroniti, M. G. Kivelson, R. Pellat, R. J. Walker, H. Lohr, and G. Paschmann, Multi-point analysis of a bursty bulk flow event on April 11, 1985, *J. Geophys. Res.*, 101, 4967, 1996.
- Angelopoulos, V., Chapman, J. A., Mozer, F. S., Scudder, J. D., Russell, C. T., Tsuruda, K. Mukai, T., Hughes, T. J. and Yumoto, K., Plasma sheet electromagnetic power generation and its dissipation along auroral field lines, *J. Geophys. Res.*, 107(A8), 1181, doi:10.1029/2001JA900136, 2002.
- Angelopoulos, V., M. Temerin, I. Roth and F. S. Mozer, Testing global storm-time electric field models using particle spectra on multiple spacecraft, *J. Geophys. Res.*, 107, 1194, doi:10.1029/2001JA900174, 2002.
- Angelopoulos, V., The THEMIS mission, *Space Sci. Rev.*, 141(1–4), 5–34, doi:10.1007/s11214-008-9336-1, 2008.
- Bazell, D., E. C. Roelof, T. Sotirelis, P. C. Brandt, H. Nair, P. Valek, J. Goldstein, and D. McComas, Comparison of TWINS images of low-altitude emission of energetic neutral atoms with DMSP precipitating ion fluxes, *J. Geophys. Res.*, 115, A10204, doi:10.1029/2010JA015644, 2010.
- Birn, J., M. F. Thomsen, J. E. Borovsky, G. D. Reeves, D. J. McComas, and R. D. Belian, Characteristic plasma properties during dispersionless substorm injections at geosynchronous orbit, *J. Geophys. Res.*, 102, 2309, 1997.
- Borovsky, J.E., M.F. Thomsen, and R.C. Elphic, The driving of the plasma sheet by the solar wind, *J. Geophys. Res.*, 103, 17,617–17,639, doi:10.1029/97JA02986, 1998.
- Braginskii, S. I., Transport Processes in a Plasma, *Reviews of Plasma Physics*, 1, 205, 1965.
- Brandt, P. C.: Son, E. C. Roelof, S. Ohtani, D. G. Mitchell, and B. Anderson, IMAGE/HENA: pressure and current distributions during the 1 October 2002 storm, *Adv. Space Res.*, 33, 719, 2004.
- Brandt, P. C.: Son, D. G. Mitchell, E. C. Roelof, and J. L. Burch, Bastille Day Storm: Global Response of the Terrestrial Ring Current, *Solar Physics*, 204, 377, 2001.

- Burch, J. L., Image mission review, *Space Sci. Rev.*, 91, 1 –14, 2000.
- Buzulukova, N., M.-C. Fok, T. E. Moore, and D. M. Ober, Generation of plasmaspheric undulations, *Geophys. Res. Lett.*, 35, L13105, doi:10.1029/2008GL034164, 2008.
- Buzulukova, N., M.-C. Fok, J. Goldstein, P. Valek, D. J. McComas, and P. C. Brandt, Ring current dynamics in moderate and strong storms: Comparative analysis of TWINS and IMAGE/HENA data with the Comprehensive Ring Current Model, *J. Geophys. Res.*, 115, A12234, doi:10.1029/2010JA015292, 2010.
- Carlson, C. W., et al., The electron and ion plasma experiment for FAST, *Space Sci. Rev.*, 98, 33, 2001.
- Daglis, I. A. R. M. Thorne, W. Baumjohann, and S. Orsini, “Fine Structure” of the storm substorm relationship: ion injections during DST decrease, *Adv. Space Res.*, 25, 23698, 2000.
- Dassoulas J., D. L. Margolies, and M. R. Peterson, The AMPTE/CCE spacecraft, *IEEE Trans Geosci.Remote Sens.*, GE-23, 234, 1985.
- deBoor, C., *A Practical Guide to Splines*, Springer, New York, doi:10.1007/978 1 4612 6333 3, 1978.
- De Michelis, Paola, Ioannis A. Daglis, and Giuseppe Consolini, An average image of proton plasma pressure and of current systems in the equatorial plan derived from AMPTE/CCE-CHEM measurements, *J. Geophys. Res.*, 104, 28,615, 1999.
- Dessler, A. J., and E. N. Parker, Hydromagnetic theory of geomagnetic storms, *J. Geophys. Res.*, 64, 2239–2252, doi:10.1029/JZ064i012p02239, 1959.
- Eastwood, J. P., D. G. Sibeck, J. A. Slavin, M. L. Goldstein, B. Lavraud, M. Sitnov, S. Imber, A. Balogh, E. A. Lucek, and I. Dandouras, Observations of multiple X-line structure in the Earth's magnetotail current sheet: A Cluster case study, *Geophys. Res. Lett.*, 32 (11), L11105, doi:10.1029/2005gl022509, 2005.
- Ebihara, Y., and M. Ejiri, Simulation study on fundamental properties of the storm time ring current, *J. Geophys. Res.*, 105(15), 15,843–15,859, doi:10.1029/1999JA900493, 2000.
- Ebihara, Y., M. Ejiri, H. Nilsson, I. Sandahl, A. Milillo, M. Grande, J. F. Fennell, and J. L. Roeder, Statistical distribution of the storm-time proton ring current: POLAR measurements, *Geophys. Res. Lett.*, 29(20), 1969, doi:10.1029/2002GL015430, 2002.

- Ebihara, Y., M. Ejiri, Hans Nilsson, I. Sandahl, M. Grande, J. F. Fennell, J. L. Roeder, D. R. Weimer, and T. A. Fritz, Multiple discrete-energy ion features in the inner magnetosphere: 9 February 1998, event. *Annales Geophysicae, European Geosciences Union*, 22 (4), pp.1297-1304, 2004.
- Ebihara, Y., M.-C. Fok, J. B. Blake, and J. F. Fennell, Magnetic coupling of the ring current and the radiation belt, *J. Geophys. Res.*, 113, A07221, doi:10.1029/2008JA013267, 2008
- Ebihara, Y., N. Nishitani, T. Kikuchi, T. Ogawa, K. Hosokawa, M.-C. Fok, and M. F. Thomsen, Dynamical property of storm time subauroral rapid flows as a manifestation of complex structures of the plasma pressure in the inner magnetosphere, *J. Geophys. Res.*, 114, A01306, doi:10.1029/2008JA013614, 2009.
- Elfritz, J. G., A.M. Keesee, N. Buzulukova, M. -C. Fok, and E. E. Scime, First results using TWINS-derived ion temperature boundary conditions in CRCM, *J. Geophys. Res. Space Physics*, 119, 3345–3361, doi:10.1002/2013JA019555, 2014.
- Fok, M.-C., J. U. Kozyra, A. F. Nagy, C. E. Rasmussen, and G. V. Khazanov, Decay of equatorial ring current ions and associated aeronomical consequences, *J. Geophys. Res.*, 98, 19,381-19,393, 1993.
- Fok, M.-C., T. E. Moore, and W. N. Spjeldvik, Rapid enhancement of radiation belt electron fluxes due to substorm dipolarization of the geomagnetic field, *J. Geophys. Res.*, 106, 3873–3881, doi:10.1029/2000JA000150, 2001a
- Fok, M.-C., R. A. Wolf, R. W. Spiro, and T. E. Moore, Comprehensive computational model of the Earth's ring current, *J. Geophys. Res.*, 106, 8417–8424, doi:10.1029/2000JA000235, 2001b.
- Fok, M.-C., T. E. Moore, G. R. Wilson, J. D. Perez, X. X. Zhang, P. C:son Brandt, D. G. Mitchell, E. C. Roelof, J.-M. Jahn, C. J. Pollock, and R. A. Wolf, Global ENA IMAGE simulations, *Space Sci. Rev.*, 109, 77-103, 2003.
- Fok, M.-C., R. B. Horne, N. P. Meredith, and S. A. Glauert, The radiation belt environment model: Application to space weather nowcasting, *J. Geophys. Res.*, 113, A03S08, doi:10.1029/2007JA012558, 2008.
- Fok, M.-C., N. Buzulukova, S.-H. Chen, P. W. Valek, J. Goldstein, and D. J. McComas, Simulation and TWINS observations of the 22 July 2009 storm, *J. Geophys. Res.*, 115, A12231, doi:10.1029/2010JA015443, 2010.

- Fok, M.-C., A. Glocer, Q. Zheng, R. B. Horne, N. P. Meredith, J. M. Albert, and T. Nagai, Recent developments in the radiation belt environment model, *J. Atmos. Sol. Terr. Phys.*, 73, 1435–1443, 2011.
- Fok, M.-C., N. Y. Buzulukova, S.-H. Chen, A. Glocer, T. Nagai, P. Valek, and J. D. Perez, The Comprehensive Inner Magnetosphere-Ionosphere Model, *J. Geophys. Res. Space Physics*, 119, 7522–7540, doi:10.1002/2014JA020239, 2014.
- Glocher, A., M.-C. Fok, T. Nagai, G. Tóth, T. Guild, and J. Blake, Rapid rebuilding of the outer radiation belt, *J. Geophys. Res.*, 116, A09213, doi:10.1029/2011JA016516, 2011.
- Gloeckler, G. et al., The charge-energy-mass (CHEM) spectrometer for 0.3 to 300 keV/e ions on AMPTE-CCE, *IEEE Trans. Geosci. Electron.*, GE-23, 234, 1985.
- Goldstein, J., and D. J. McComas, Five years of stereo magnetospheric imaging by TWINS, *Space Sci. Rev.*, 180, 39, doi:10.1007/s11214-013-0012-8, 2013.
- Goldstein, J., V. Angelopoulos, S. De Paxcuale, H. O. Funsten, W. S. Kurth, K. Llera, D. J. McComas, J. D. Perez, G. D. Reeves, H. E. Spencer, S. A. Thaller, P.W. Valek, and J. R. Wyant, Cross-scale observations of the 2015 St. Patrick's day storm: THEMIS, Van Allen Probes, and TWINS, *J. Geophys. Res. Space Physics*, 122, 368–392, doi:10.1002/2016JA023173, 2017.
- Goldstein, J., & McComas, D. J., The big picture: Imaging of the global geospace environment by the TWINS mission. *Reviews of Geophysics*, 56, <https://doi.org/10.1002/2017RG000583>, 2018.
- Grimes, E. W., J. D. Perez, J. Goldstein, D. J. McComas, P. Valek, and D. Turner, Comparison of TWINS and THEMIS observations of proton pitch angle distributions in the ring current during the 29 May 2010 geomagnetic storm, *J. Geophys. Res. Space Physics*, 118, 4895–4905, doi:10.1002/jgra.50455, 2013.
- Groth, C.P.T., Zeeuw, D.L., Gombosi, T.I., and Powell, K.G., Global three-dimensional MHD simulation of a space weather event: CME formation, interplanetary propagation, and interaction with the magnetosphere, *J. Geophys. Res.* 105, 25053–25078, 2000.
- Hardy, D. A., L. K. Schmitt, M. S. Gussenhoven, F. J. Marshall, H. C. Yeh, T. L. Schumaker, A. Huber, and J. Pantazis, Precipitating electron and ion detectors (SSJ 4) for the block 5D Flights 6–10 DMSP satellites: Calibration and data presentation, Rep. AFGL TR 84 0317, Air Force Geophys. Lab., Hanscom Air Force Base, Mass, 1984.
- Hardy, D. A., M. S. Gussenhoven, R. Raistrick, and W. J. McNeil, Statistical and functional

- representations of the pattern of auroral energy flux, number flux, and conductivity, *J. Geophys. Res.*, 92, 12,275–12,294, doi:10.1029/JA092iA11p12275, 1987.
- Harel, M., R. A. Wolf, P.H. Reiff, R. W. Spiro, W. J. Burke, F. J. Rich, and M. Smiddy, Quantitative simulation of a magnetospheric substorm, 1, Model logic and overview, *J. Geophys. Res.*, 86, 22,17–22,41, 1981.
- Imber, S. M., J. A. Slavin, H. U. Auster, and V. Angelopoulos, A THEMIS survey of fluxropes and traveling compression regions: Location of the near-Earth reconnection site during solar minimum, *J. Geophys. Res.*, 116, A02201, doi:10.1029/2010ja016026, 2011.
- Kistler, L. M., et al., Testing electric field models using ring current ion energy spectra from the Equator-S ion composition (ESIC) instrument, *Ann. Geophys.*, 17, 1611, 1999.
- Kistler, Lynn M. and Douglas J. Larson, Testing electric and magnetic field models of the storm-time inner magnetosphere, *J. Geophys. Res.* 105, 25,221, 2000.
- Korth, H., M. F. Thomsen, J. E. Borovsky, and D. J. McComas, Plasma sheet access to geosynchronous orbit, *J. Geophys. Res.*, 104, 25,045, 1999.
- Lin, Y., X. Y. Wang, S. Lu, J. D. Perez, and Q. Lu, Investigation of storm time magnetotail and ion injection using three-dimensional global hybrid simulation, *J. Geophys. Res. Space Physics*, 119, 7413–7432, doi:10.1002/2014JA020005, 2014.
- Lui, A., R. McEntire, and S. Krimigis, Evolution of the ring current during two geomagnetic storms, *J. Geophys. Res.*, 92(A7), 7459–7470, doi:10.1029/JA092iA07p07459, 1987.
- Lui, A. T. Y., T. Hori, S. Ohtani, Y. Zhang, X. Y. Zhou, M. G. Henderson, T. Mukai, H. Hayakawa, and S. B. Mende, Magnetotail behavior during storm time “sawtooth injections,” *J. Geophys. Res.*, 109, A10215, doi:10.1029/2004JA010543, 2004.
- Mauk, B. H., N. J. Fox, S. G. Kanekal, R. L. Kessel, D. G. Sibeck, and A. Ukhorskiy, Science objectives and rationale for the Radiation Belt Storm Probes mission, *Space Sci. Rev.*, 179, 3–27, doi:10.1007/s11214-012-9908-y, 2013.
- McComas, D. J., H.O. Funsten, E.E. Scime, Advances in low energy neutral atom imaging, in *Measurement Techniques in Space Plasmas-Fields*, ed. by R.F. Pfaff, J.E. Borovsky, D.T. Young. *Geophys. Monograph Series*, 103 (AGU, Washington), 275B280, 1998.
- McComas, D. J., F. Allegrini, J. Baldonado, B. Blake, P. C. Brandt, J. Burch, J. Clemmons, W. Crain, D. Delapp, R. DeMajistre, D. Everett, H. Fahr, L. Friesen, H. Funsten, J. Goldstein, M. Gruntman, R. Harbaugh, R. Harper, H. Henkel, C. Holmlund, G. Lay, D. Mabry, D. Mitchell, U. Nass, C. Pollock, S. Pope, M. Reno, S. Ritzau, E. Roelof, E. Scime, M. Sivjee,

- R. Skoug, T. S. Sotirelis, M. Thomsen, C. Urdiales, P. Valek, K. Viherkanto, S. Weidner, T. Ylikorpi, M. Young, J. Zoennchen, The Two Wide-angle Imaging Neutral-atom Spectrometers (TWINS) NASA Mission-of-Opportunity, *Space Sci. Rev.* 142, 157B231 DOI:10.1007/s11214-008-9467-4, 2009a.
- McComas, D.J., F. Allegrini, P. Bochsler, M. Bzowski, E.R. Christian, G.B. Crew, R. DeMajistre, H. Fahr, H. Fichtner, P. Frisch, H.O. Funsten, S. A. Fuselier, G. Gloeckler, M. Gruntman, J. Heerikhuisen, V. Izmodenov, P. Janzen, P. Knappenberger, S. Krimigis, H. Kucharek, M. Lee, G. Livadiotis, S. Livi, R.J. MacDowall, D. Mitchell, E. Möbius, T. Moore, N.V. Pogorelov, D. Reisenfeld, E. Roelof, L. Saul, N.A. Schwadron, P.W. Valek, R. Vanderspek, P. Wurz, and G.P. Zank, Global observations of the interstellar interaction from the Interstellar Boundary Explorer (IBEX), *Science*, 326, 959-962, doi: 10.1126/science.1180906, 2009b.
- McComas, D. J., N. Buzulukova, M. G. Connors, M. A. Dayeh, J. Goldstein, H. O. Funsten, S. Fuselier, N. A. Schwadron, and P. Valek, Two Wide-Angle Imaging Neutral-Atom Spectrometers and Interstellar Boundary Explorer energetic neutralatom imaging of the 5 April 2010 substorm, *J. Geophys. Res.*, 117, A03225, doi:10.1029/2011JA017273, 2012.
- McEntire, R. W., E. P. Keath, D. E. Fort, A. T. Y. Lui and S. M. Krimigis, "The Medium-Energy Particle Analyzer (MEPA) on the AMPTE CCE Spacecraft," in *IEEE Transactions on Geoscience and Remote Sensing*, vol. GE-23, no. 3, pp. 230-233, May 1985, doi: 10.1109/TGRS.1985.289518 Mitchell, D. G., S. E. Jaskulek, C. E. Schlemm, E. P. Keath, R. E. Thompson, B. E. Tossman, J. D. Boldt, J. R. Hayes, G. B. Andrews, N. Paschalidis, D. C. Hamilton, R. A. Lundgren, E. O. Tums, P. Wilson IV, H. D. Voss, D. Prentice, K. C. Hsieh, C. C. Curtis, F. R. Powell,, High Energy Neutral Atom (HENA) Imager for the IMAGE mission, *Space Sci. Rev.*, 91, 67, 2000.
- Mitchell, D. G., L. J. Lanzerotti, C. K. Kim, M. Stokes, G. Ho, S. Cooper, A. Ukhorskly, J. W. Manweller, S. Jaskulek, D. K. Haggerty, P. Brandt, M. Sitnov, N. Keika, J. F. Hayes, L. E. Brown, R. S. Gurnce, J. C. Hutcheson, K. S. Nelson, N. Paschalidis, E. Rossano, and S. Kerem, Radiation Belt Storm Probes Ion Composition Experiment RBSPICE, *Space Sci. Rev.*, 179, 263–308, 2013.
- Moore, T.E., D. J. Chornay, M. R. Collier, F. A. Herrero, J. Johnson, M. A. Johnson, J. W. Keller, J. F. Laudadio, J. F. Lobell, K. W. Ogilvie, J. P. Rozmarynowski, S. A. Fuselier, A. G. Ghielmetti, E. Hertzberg, D. C. Hamilton, R. Lundgren, P. Wilson, P. Walpolle, T.M. Stephen, B. L. Peko, B. Van Zyl, P. Wurz, J. M. Quinn and G. R. Wilson., The low-energy neutral atom imager for IMAGE, *Space Sci. Rev.* 91,155–195, 2000.
- Nakamura, R., W. Baumjohann, M. Brittnacher, V. A. Sergeev, M. Kubyshkina, T. Mukai, and K. Liou, Flow bursts and auroral activations: Onset timing and foot point location, *J.*

- Geophys. Res., 106, 10,777, 2001.
- Ober, D. M., J. L. Horwitz, and D. L. Gallagher (1997), Formation of density troughs embedded in the outer plasma sphere by subauroral ion drift events, *J. Geophys. Res.*, 102, 14,595 – 14,602, doi:10.1029/97JA01046.
- Perez, J. D., X.-X. Zhang, P. Cson Brandt, D. G. Mitchell, J.-M. Jahn, and C. J. Pollock, Dynamics of ring current ions as obtained from IMAGE HENA and MENA ENA images, *J. Geophys. Res.* 109, A05208, doi:10.1029/2003JA010164, 2004.
- Perez, J. D., E. W. Grimes, J. Goldstein, D. J. McComas, P. Valek, and N. Billor, Evolution of CIR storm on 22 July 2009, *J. Geophys. Res.*, 117, A09221, doi:10.1029/2012JA017572, 2012.
- Perez, J. D., J. Goldstein, D. J. McComas, P. Valek, N. Buzulukova, M.-C. Fok, and H. J. Singer, TWINS stereoscopic imaging of multiple peaks in the ring current, *J. Geophys. Res. Space Physics*, 120, 368–383, doi:10.1002/2014JA020662, 2015.
- Perez, J. D., J. Goldstein, D. J. McComas, P. Valek, M.-C. Fok, and K.-J. Hwang, Global images of trapped ring current ions during main phase of 17 March 2015 geomagnetic storm as observed by TWINS, *J. Geophys. Res. Space Physics*, 121, doi:10.1002/2016JA022375, 2016.
- Pollock, C.J., K. Asamura, J. Baldonado, M. M. Balkey, P. Barker, J. L. Burch, E. J. Korpela, J. Cravens, G. Dirks, M.-C. Fok, H. O. Funsten, M. Grande, M. Gruntman, J. Hanley, J.-M. Jahn, M. Jenkins, M. Lampton, M. Marckwordt, D. J. McComas, T. Mukai, G. Penegor, S. Pope, S. Ritzal, M. I. Schattenburg, E. Scime, R. Skoug, M. Spurgeon, T. Stecklein, S. Storms, C. Urdiales, P. Valek, J. T. M. Van Bee, S.E. Weidner, M. Wuest, M. K. Young, and C. Zinsmeter, Medium Energy Neutral Atom (MENA) imager for the IMAGE mission, *Space Sci. Rev.* 91, 113–154, 2000.
- Pollock, C. J., K. Asamura, M. M. Balkey, J. L. Burch, H. O. Funsten, M. Grande, M. Gruntman, M. Henderson, J. M. Jahn, M. Lampton, M. W. Liemohn, D. J. McComas, T. Mukai, S. Ritanu, M. L. Schattenburg, E. Scime, R. Skoug, P. Valek, and M. Wuest, First medium energy neutral atom (MENA) images of Earth's magnetosphere during substorm and storm-time, *Geophys. Res. Letters*, 28, 1147, 2001.
- Réme, H., C. Aoustin, J. M. Bosques, I. Dandouras, B. Lavraud, J. A. Sauvaud, A. Barthe, J. Bouyssou, Th. Camus, O. Coeur-Joly, A. Cros, J. Cuvilo, F. Ducay, Y. Garbarowitz, J. L. Medale, E. Penou, H. Perrier, D. Romefort, J. Rouzaud, C. Vallat, D. Alcayde, C. Jacquey, C. Mazelle, C. d'Uston, E. Mobius, L. M. Kistler, K. Crocker, M. Granoff, C. Mouikis, M. Popecki, M. Vosbury, B. Klecker, D. Hovestadt, H. Kucharek, E. Kuenneth, G. Paschmann,

- 905 M. Scholer, N. Sckopke, E. Seidenschwang, C. W. Carlson, D. W. Curtis, C. Ingraham, R. P.  
 906 Lin, J. P. McFadden, G. K. Parks, T. Phan, V. Formisano, E. Amata, M. B. Bavassano-  
 907 Cattaneo, P. Baldetti, R. Bruno, G. Chionchio, A. Di Lellis, M. F. Marcucci, G. Pallochia,  
 908 A. Korth, P. W. Daly, B. Braeve, M. Rosenbauer, V. Vasyliunas, M. McCarthy, M. Wilber,  
 909 L. Eliasson, R. Lundin, S. Olsen, E. G. Shelley, S. Fuselier, A. G. Ghielmetti, W.  
 910 Lennartsson, C. P. Escoubet, H. Balsiger, R. Friedel, J.-B. Cao, R. A. Kovrazhkin, I.  
 911 Papamastorakis, R. Pellat, J. Scudder, and B. Sonnerup, First multispacecraft ion  
 912 measurements in and near the Earth's magnetosphere with the identical Cluster ion  
 913 spectrometry (CIS) experiment, *Ann. Geophys.*, 19, 1303, 2001.
- 914
- 915 Roelof, E. C., ENA Emission from Nearly-Mirroring Magnetospheric Ions Interacting with the  
 916 Exosphere, *Adv. Space Res.* 20, 361, 1997.
- 917
- 918 Sckopke, N., A general relation between the energy of trapped particles and the disturbance field  
 919 near the Earth, *J. Geophys. Res.*, 71, 3125–3130, 1966.
- 920
- 921 Scudder, J., et al., HYDRA: A 3-dimensional electron and ion hot plasma instrument for the  
 922 POLAR spacecraft of the GGS mission, *Space Sci. Rev.*, 71, 459, 1995.
- 923
- 924 Slavin, J. A., R. P. Lepping, J. Gjerloev, D. H. Fairfield, M. Hesse, C. J. Owen, M. B. Moldwin,  
 925 T. Nagai, A. Ieda, and T. Mukai, Geotail observations of magnetic flux ropes in the plasma  
 926 sheet, *J. Geophys. Res.*, 108 (A1), 1015, doi:10.1029/2002ja009557, 2003.
- 927
- 928 Smith, P., and R. Hoffman, Ring current particle distributions during the magnetic storms of  
 929 December 16– 18, 1971, *J. Geophys. Res.*, 78(22), 4731–4737,  
 930 doi:10.1029/JA078i022p04731, 1973.
- 931
- 932 Spence, H. E., G. D. Reeves, D. N. Baker, J. B. Blake, M. Bolton, S. Bourdarie, A. A. Chan, S.  
 933 G. Claudepierre, J. H. Clemmons, J. P. Cravens, S. R. Elkington, J. F. Fennell, R. H. W.  
 934 Friedel, H. O. Funsten, J. Goldstein, J. C. Green, A. Guthrie, M. G. Henderson, R. B.  
 935 Horne, M. K. Hudson, J.-M. Jahn, V. K. Jordanova, S. G. Kanekal, B. W. L. Klatt, B. A.  
 936 Larsen, X. Li, E. A. MacDonald, I. R. Mann, J. Niehof, T. P. O'Brien, T. G. Onsaga, D.  
 937 Salvaggio, R. M. Skoug, S. S. Smith, L. L. Suther, M. F. Thomsen, R. M. Thorne, Science  
 938 goals and overview of the Radiation Belt Storm Probes (RBSP) Energetic Particle,  
 939 Composition, and Thermal Plasma (ECT) suite on NASA's Van Allen Probes mission, *Space*  
 940 *Sci. Rev.*, 179, 311–336, doi:10.1007/s11214-013-0007-5, 2013.
- 941
- 942 Stern, D.P., The motion of a proton in the equatorial magnetosphere, *J. Geophys. Res.*, 80, 595,  
 943 1975.
- 944
- 945 Toffoletto, F., S. Sazykin, R. Spiro, and R. Wolf, Inner magnetospheric modeling with the Rice  
 946 convection model, *Space Sci. Rev.*, 107, 175–196, 2003.



- Tsyganenko, N. A., A magnetospheric magnetic field model with a warped tail current sheet, *Planet. Space Sci.*, 37, 5-20, 1989.
- Tsyganenko, N. A., and D. P. Stern, Modeling the global magnetic field of the large scale Birkeland current systems, *J. Geophys. Res.*, 101, 27,187–27,198, doi:10.1029/96JA02735, 1996.
- Tsyganenko, N. A., and T. Mukai, Tail plasma sheet models derived from Geotail particle data, *J. Geophys. Res.*, 108(A3), 1136, doi:10.1029/2002JA009707, 2003.
- Tsyganenko, N. A., and M. I. Sitnov, Modeling the dynamics of the inner magnetosphere during strong geomagnetic storms, *J. Geophys. Res.*, 110, A03208, doi:10.1029/2004JA010798, 2005.
- Vallat, C., I. Dandouras, P. X. Brandt, R. DeMajistre, D. G. Mitchesll, E. C. Roelof, H. Reme, J.-A. Sauvaud, L. Kistler, C. Mouikis, M. Dunlop, and A. Balgh, First comparisons of local ion measurements in the inner magnetosphere with energetic neutral atom magnetospheric image inversions: Cluster-CIS and IMAGE-HENA observations, *J. Geophys. Res.*, 109, A04213, doi:10.1029/2003JA010224, 2004.
- Volland, H., A semiempirical model of large-scale magnetospheric electric fields, *J. Geophys. Res.*, 78, 171, 1973.
- Wahba, G., *Spline Models for Observational Data*, Soc. for Ind. and Appl. Math., Philadelphia, Pa., doi:10.1137/1.9781611970128, 1990.
- Weimer, D.R., A flexible, IMF dependent model of high-latitude electric potentials having "space weather" applications, *Geophys. Res. Lett.*, 23, 2549, 1996.
- Weimer, D. R., An improved model of ionospheric electric potentials including substorm perturbations and applications to the Geospace environment modeling November 24, 1996, event, *J. Geophys. Res.*, 106, 407–416, doi:10.1029/2000JA000604, 2001.
- Wilken, B., et al., Magnetospheric ion composition spectrometer onboard the CRRES spacecraft, *Journal of Spacecraft and Rockets*, 29, 585, 1992.
- Yang, J., F. R. Toffoletto, R. A. Wolf, and S. Sazykin, On the contribution of plasma sheet bubbles to the storm time ring current, *J. Geophys. Res. Space Physics*, 120, 7416–7432, doi:10.1002/2015JA021398, 2015.
- Zheng, Y., A. T. Y. Lui, and M.-C. Fok, Effects of plasma sheet properties on storm-time ring

989 current, J. Geophys. Res., 115, A08220, doi:10.1029/2009JA014806, 2010.  
990  
991 Zoennchen, J. H., U. Nass and H. J. Fahr, Terrestrial exospheric hydrogen density distributions  
992 under solar minimum and maximum conditions observed by the TWINS stereo mission, Ann.  
993 Geophys., 33, 413–426, doi:10.5194, 2105.  
994  
  
995  
  
996

**Figure Captions**

**Figure 1.** The solar wind parameters and geomagnetic indices for the two storms during the period 07-10 September 2015. The data is from the OMNI data base ([https://omniweb.gsfc.nasa.gov/html/omni\\_min\\_data.html](https://omniweb.gsfc.nasa.gov/html/omni_min_data.html)).

**Figure 2.** Plot of the ion equatorial pressure peak as a function of time during the 4-day period 07-10 September 2015. (a) the radial location and (b) the MLT location. The green triangles mark the locations obtained from the TWINS ENA images, the red line from the CIMI/Weimer simulations and the orange line from the CIMI/RCM simulations.

**Figure 3.** The ion equatorial pressure (first row) and pressure anisotropy (second row) for 2200 UT 07 September 2015 from the CIMI/RCM simulations (first column), from the TWINS ENA images (second column), and the CIMI/Weimer simulations (third column). The stars mark the location of the peaks.

**Figure 4.** The ion equatorial pressure and pressure anisotropy for 0400 UT 08 September 2015 in the same format as Figure 3.

**Figure 5.** The ion equatorial pressure and pressure anisotropy for 1600 UT 08 September 2015 in the same format as Figure 3.

1018

1019 **Figure 6.** The ion equatorial pressure and pressure anisotropy for 0200 UT 09 September 2015  
1020 in the same format as Figure 3.

1021

1022 **Figure 7.** The ion equatorial pressure and pressure anisotropy for 0400 UT 09 September 2015  
1023 in the same format as Figure 3.

1024

1025 **Figure 8.** The ion equatorial pressure and pressure anisotropy for 1800 UT 09 September 2015  
1026 in the same format as Figure 3.

1027

1028 **Figure 9.** The ion equatorial pressure and pressure anisotropy for 1700 UT 10 September 2015  
1029 in the same format as Figure 3.

1030

1031 **Figure 10.** Paths of 46 keV particles, the energy of protons at the maximum flux (See left  
1032 column.) that reach the 4 pressure peaks observed by TWINS as shown in Figure 8. The  
1033 observed pressure is shown in grey scale. The locations of the peaks are shown by black squares.  
1034 The energy of the particle is indicated by the color of the stars that are spaced 10 minutes apart.  
1035 The units of the color bars are keV. The energies span the range of the particle energies along  
1036 their paths.

1037

1038

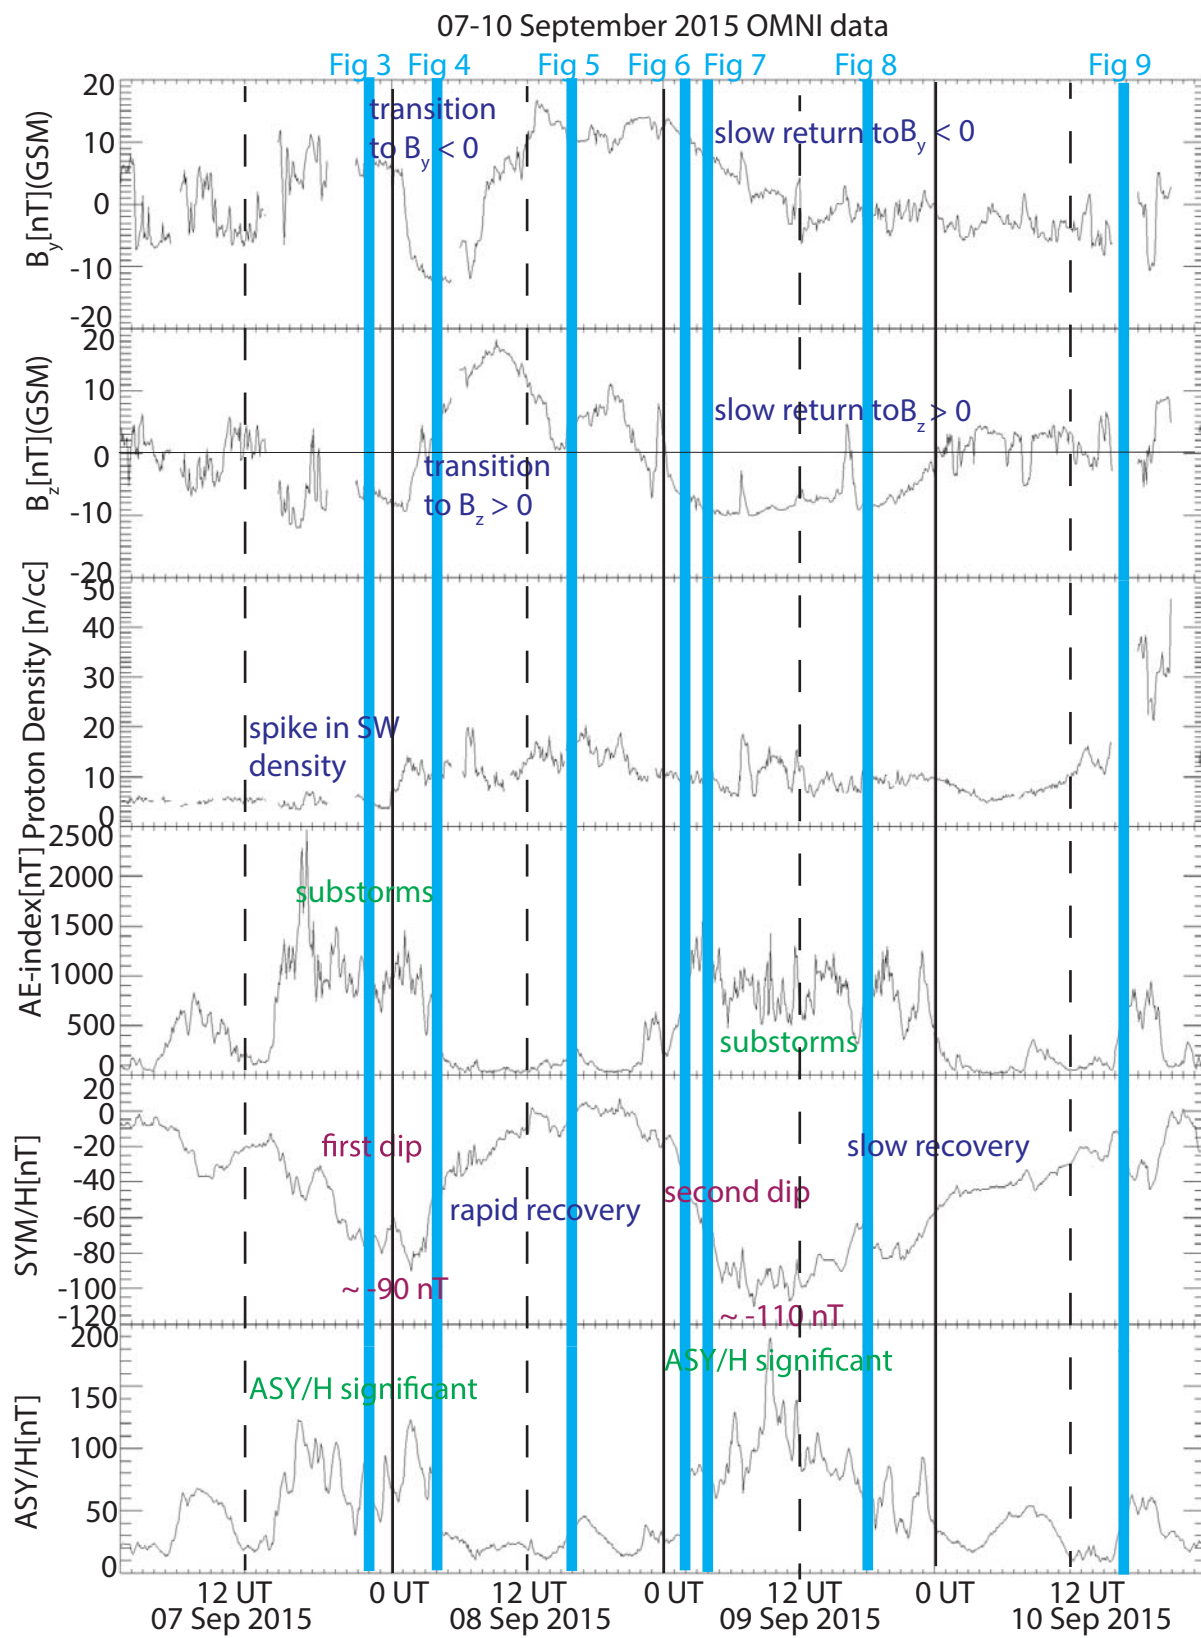

Figure 1

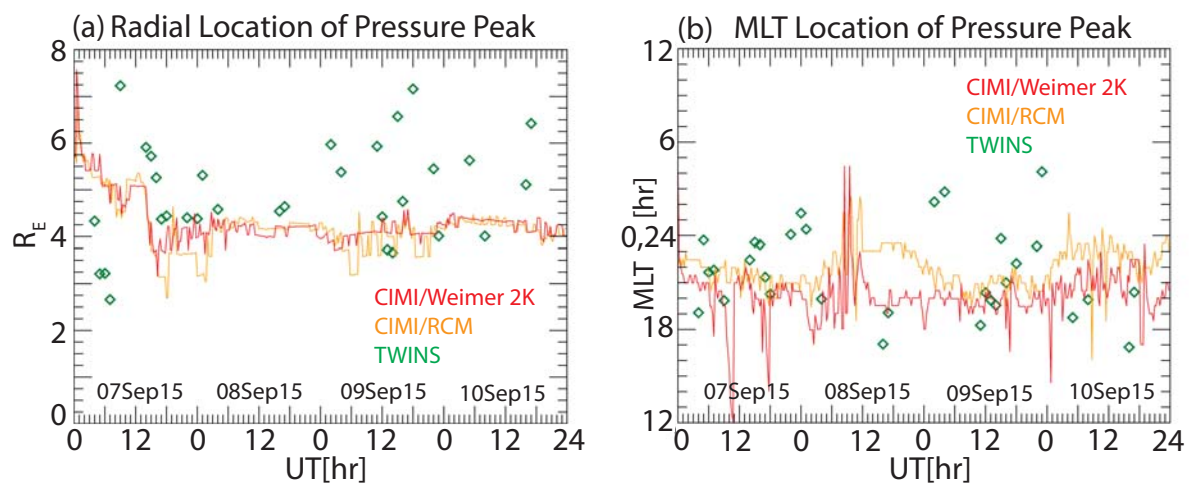

Figure 2

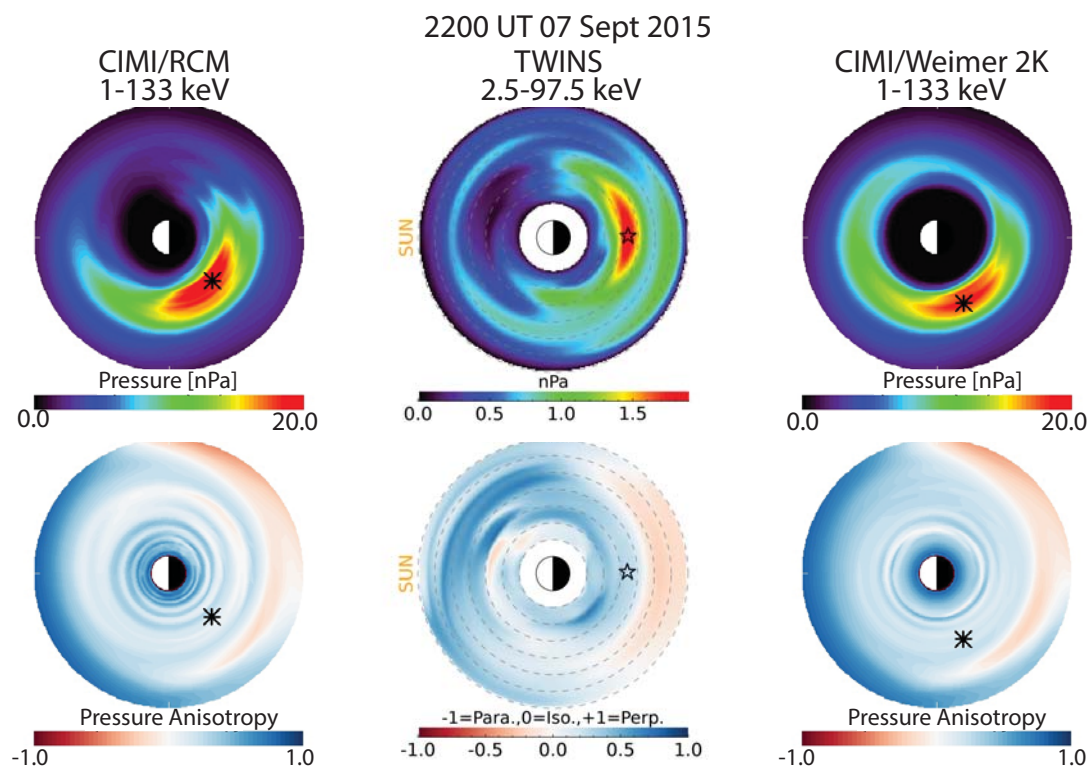

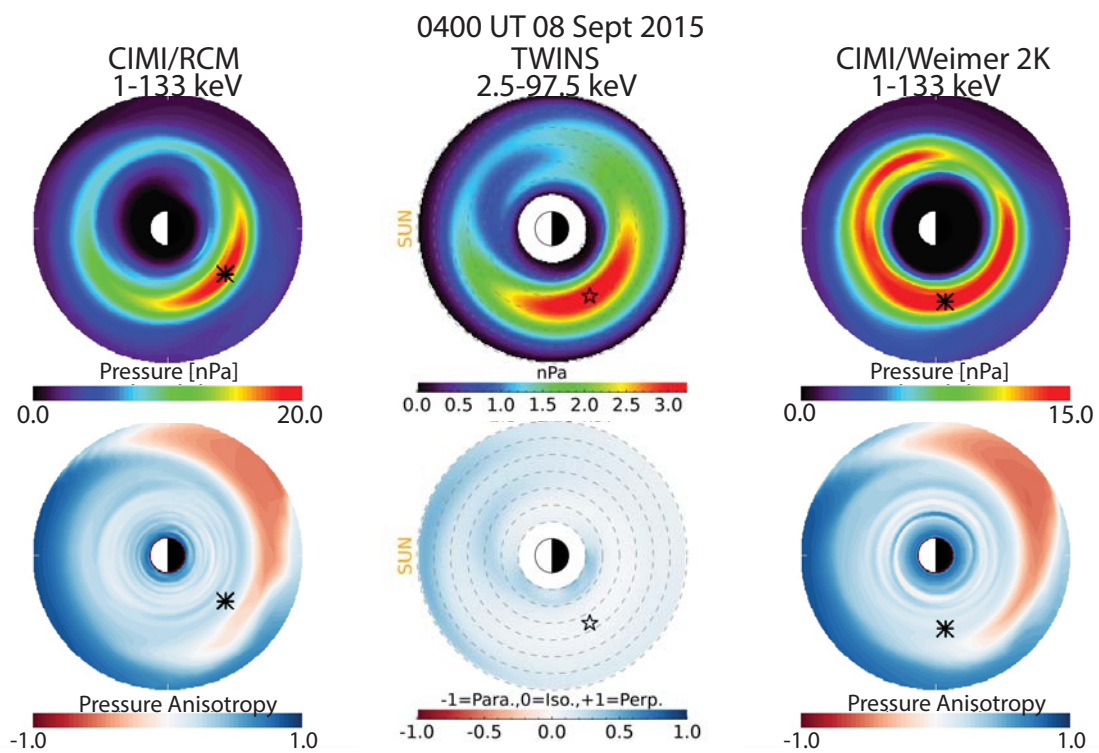

Figure 4



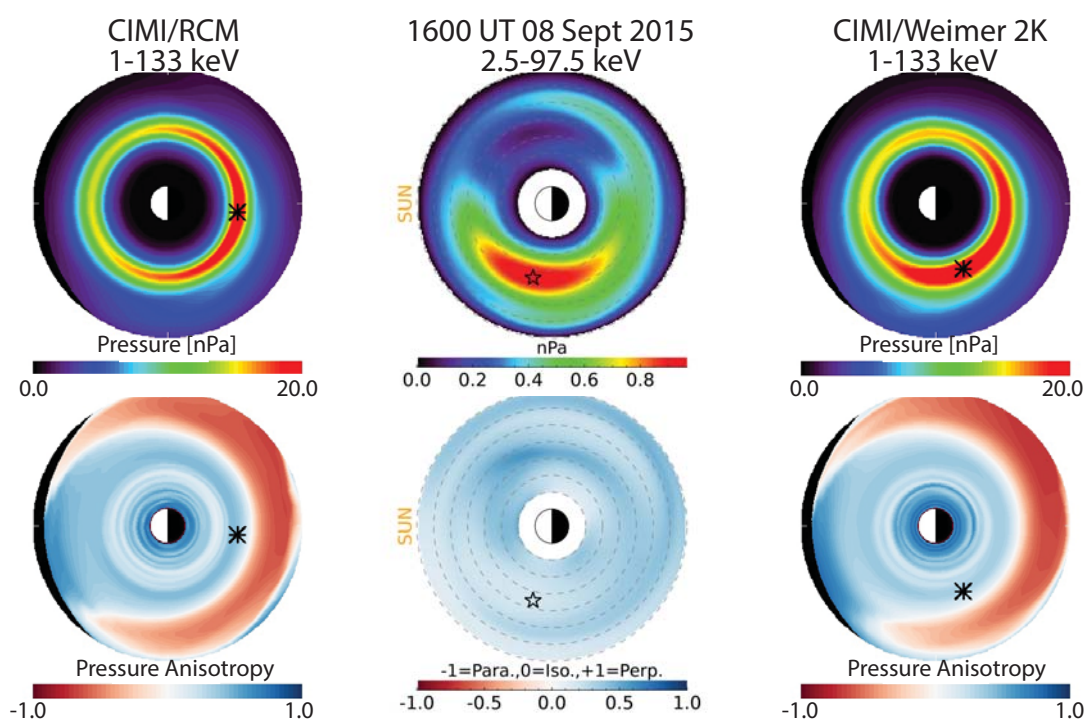

Figure 5

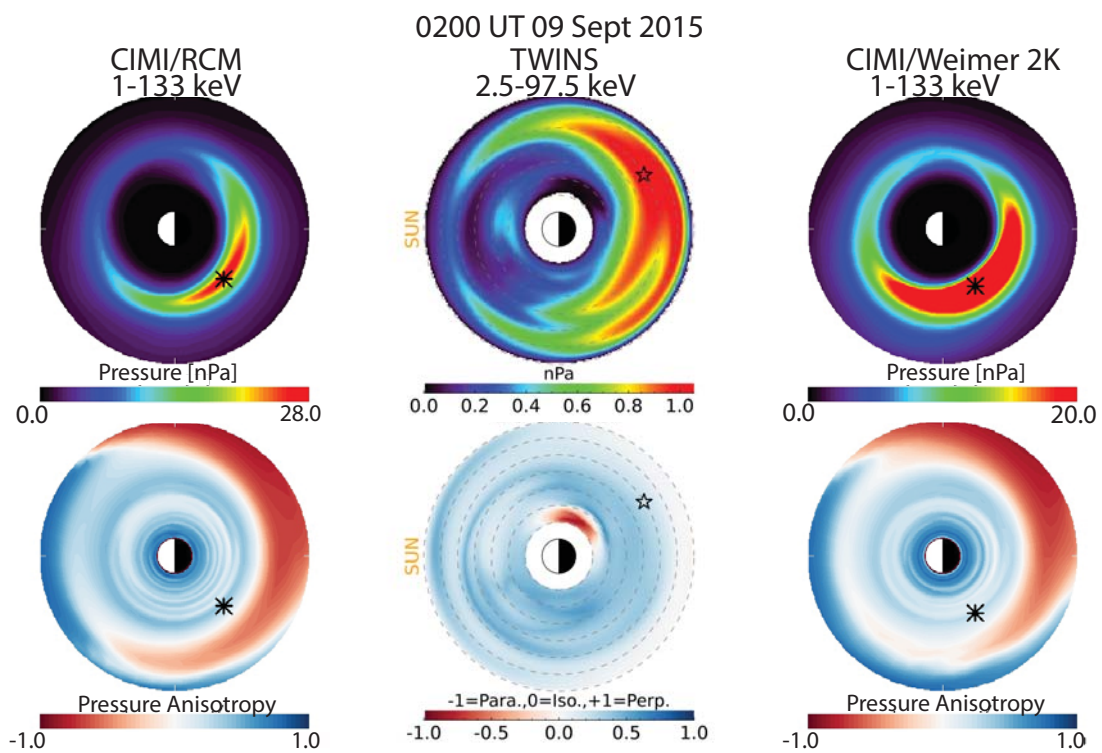

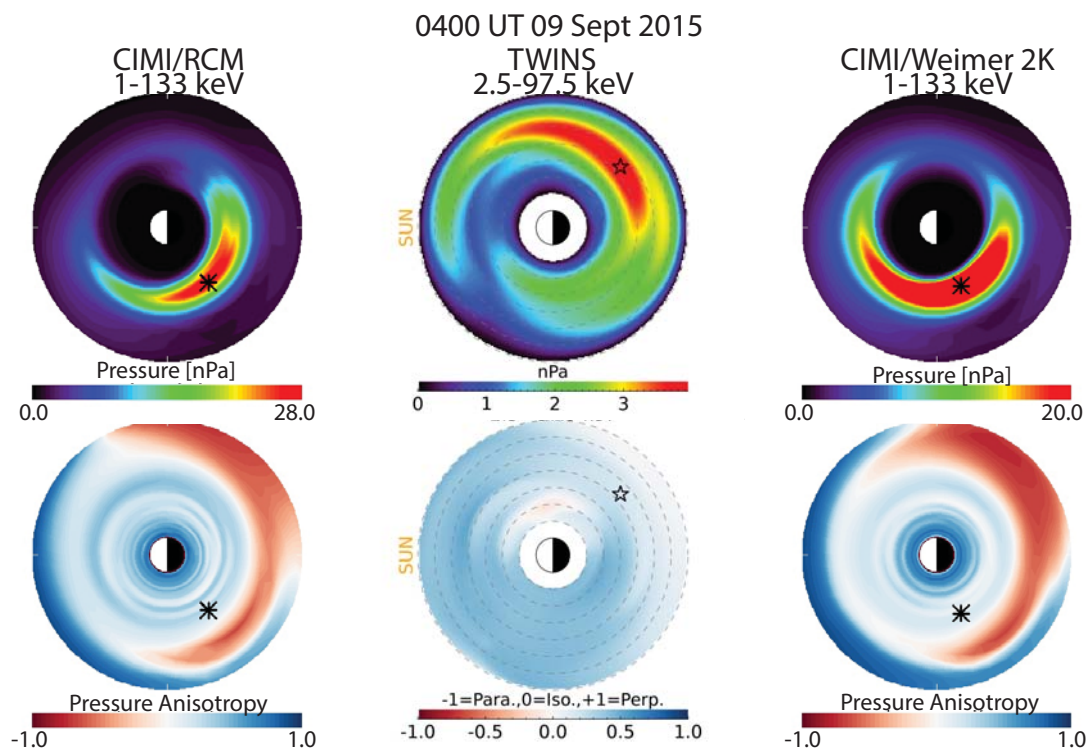

Figure 7

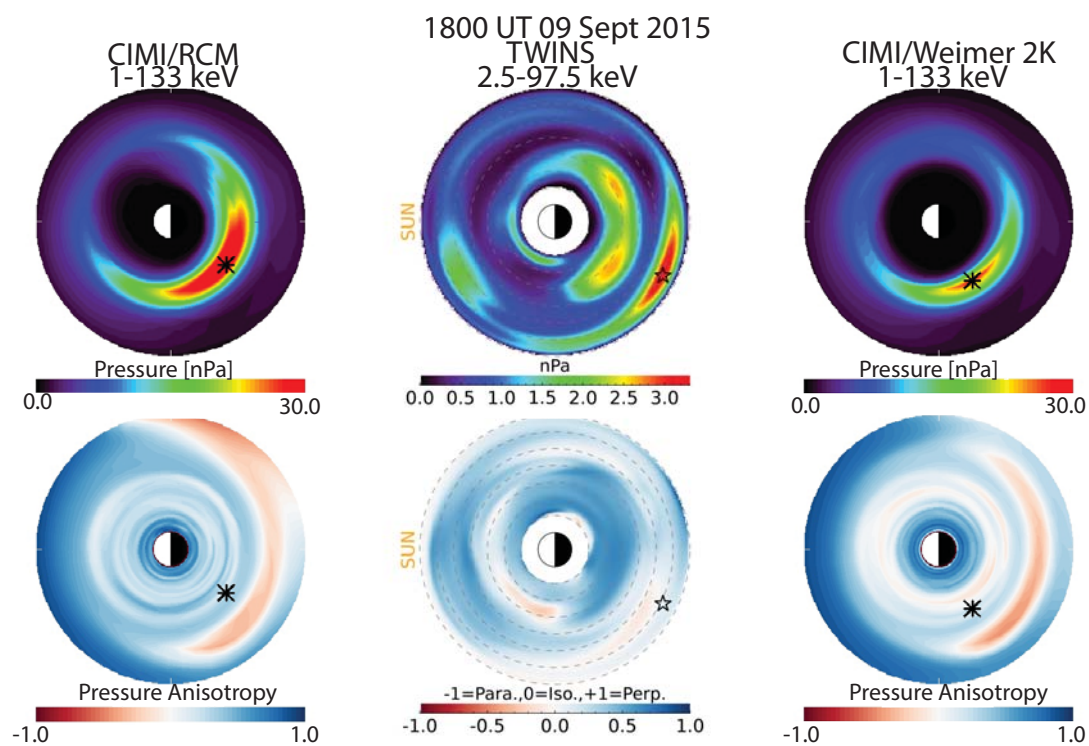

Figure 8

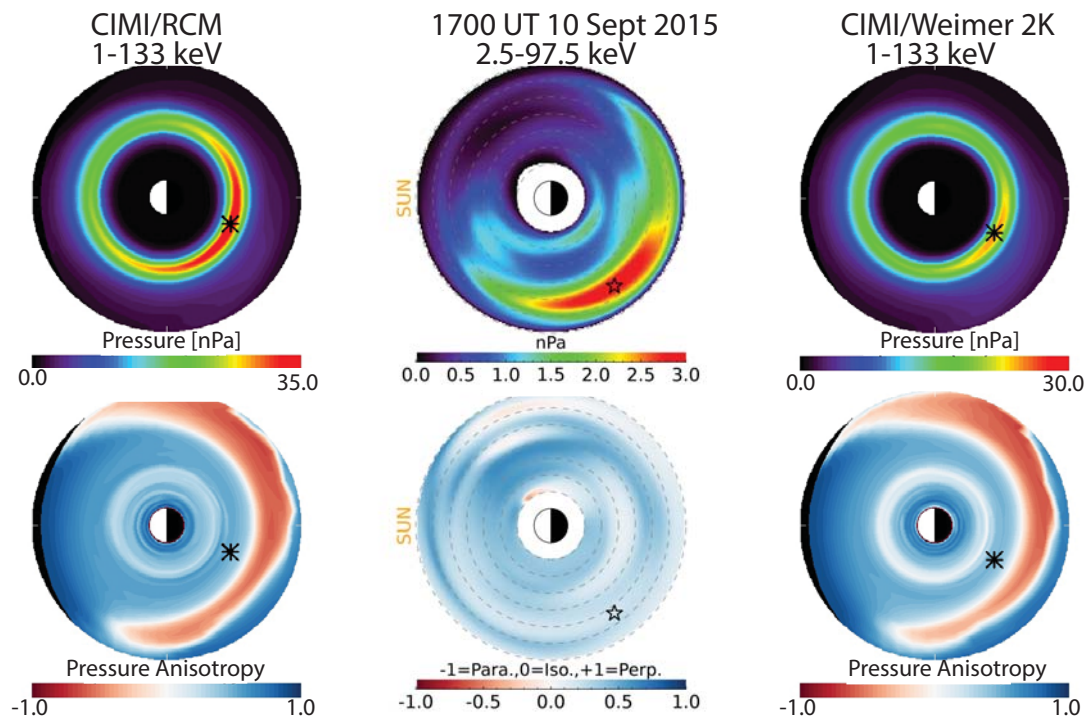

Figure 9

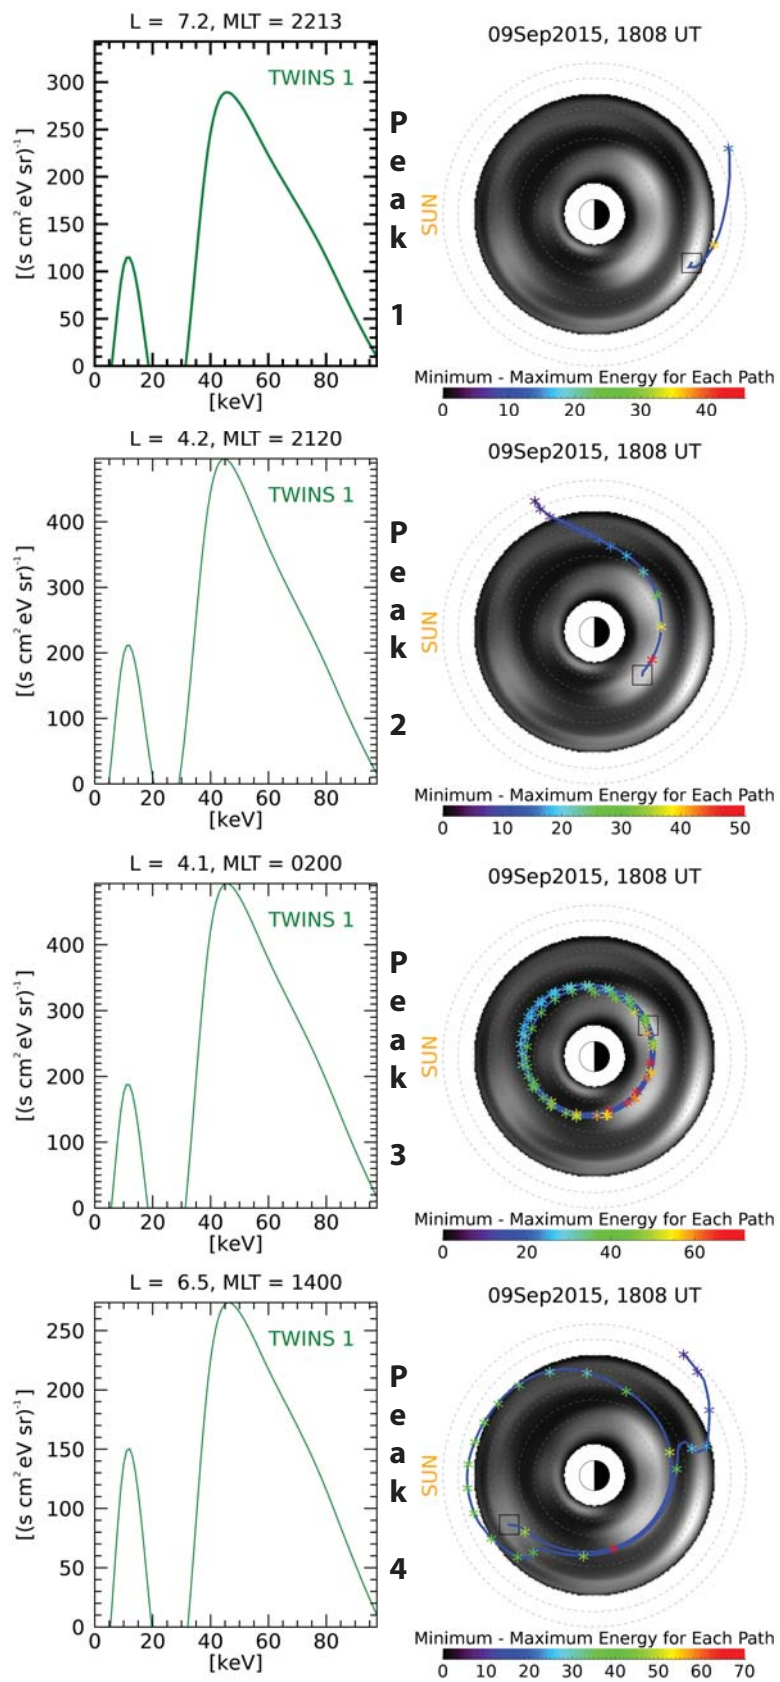

Figure 10
